# Supplementary material
Source: PubMed Central journal article supplement (PMC11115173)
Supplement: 18_2011_752_MOESM1_ESM.pdf [file 18_2011_752_MOESM1_ESM.pdf]

# Protein-Profiling of Genomic Instability in Endometrial Cancer

Timo Gemoll<sup>1,2,3</sup>, Jens K. Habermann<sup>1,2</sup>, Johanna Lahmann<sup>2</sup>,  
Silke Szymczak<sup>4</sup>, Caroline Lundgren<sup>5</sup>, Nana K. Bündgen<sup>2</sup>, Thomas  
Jungbluth<sup>2</sup>, Britta Nordström<sup>5</sup>, Susanne Becker<sup>3</sup>, Marta I. Lomnytska<sup>3,5</sup>,  
Hans-Peter Bruch<sup>2</sup>, Andreas Ziegler<sup>4</sup>, Ulf Hellman<sup>6</sup>, Gert Auer<sup>3</sup>, Uwe J.  
Roblick<sup>1,2</sup>, and Hans Jörnvall<sup>1</sup>

(1) Department of Medical Biochemistry and Biophysics, Karolinska Institutet, SE-17177 Stockholm, Sweden

(2) Department of Surgery, University of Lübeck, D-23538 Lübeck, Germany

(3) Karolinska Biomic Center, Karolinska Institutet, SE-17176 Stockholm, Sweden

(4) Institute of Medical Biometry and Statistics, University of Lübeck, D-23562 Lübeck, Germany

(5) Department of Oncology, Radiumhemmet, Karolinska University Hospital, SE-17176 Stockholm, Sweden

(6) Ludwig Institute for Cancer Research, Ltd., SE-75124 Uppsala, Sweden

Address for correspondence:

Professor Hans Jörnvall, MD  
Department of Medical Biochemistry and Biophysics  
Scheeles väg 2  
Karolinska Institutet  
SE-17177 Stockholm, Sweden  
Phone: +46-8-524 877 02  
Fax: +46-8-33 74 62  
Mail: [Hans.Jornvall@ki.se](mailto:Hans.Jornvall@ki.se)

&

Jens K. Habermann, M.D., Ph.D.  
Laboratory for Surgical Research, Dept. of Surgery  
University Clinic Schleswig-Holstein, Campus Lübeck  
Ratzeburger Allee 160  
D-23538 Lübeck, Germany  
Phone: +49-451-5002676  
Fax: +49-451-5002069  
Mailto: [Jens.Habermann@gmail.com](mailto:Jens.Habermann@gmail.com)

**S1: Patient cohorts**

|                                          | Normal | Diploid EC | Aneuploid EC | Aneuploid UPSC | Total   |
|------------------------------------------|--------|------------|--------------|----------------|---------|
| <b>Total</b>                             | 5      | 7          | 3            | 4              | 19      |
| <b>Average age at diagnosis (years)</b>  | 50     | 67         | 69           | 79             | 71      |
| <b>Range (years)</b>                     | 36-64  | 54 - 92    | 47 – 82      | 67 - 91        | 36 - 92 |
| <b>Average observation time (months)</b> |        | 97         | 81           | 23             | 72      |
| <b>Maximum (months)</b>                  |        | 144        | 146          | 36             | 146     |

EC, endometrioid cancer; UPSC, uterine papillary serous carcinoma
