# Supplementary material
Source: PubMed Central journal article supplement (PMC11115173)
Supplement: 18_2011_752_MOESM2_ESM.pdf [file 18_2011_752_MOESM2_ESM.pdf]

# **Protein-Profiling of Genomic Instability in Endometrial Cancer**

Timo Gemoll<sup>1,2,3</sup>, Jens K. Habermann<sup>1,2</sup>, Johanna Lahmann<sup>2</sup>,  
Silke Szymczak<sup>4</sup>, Caroline Lundgren<sup>5</sup>, Nana K. Bündgen<sup>2</sup>, Thomas  
Jungbluth<sup>2</sup>, Britta Nordström<sup>5</sup>, Susanne Becker<sup>3</sup>, Marta I. Lomnytska<sup>3,5</sup>,  
Hans-Peter Bruch<sup>2</sup>, Andreas Ziegler<sup>4</sup>, Ulf Hellman<sup>6</sup>, Gert Auer<sup>3</sup>, Uwe J.  
Roblick<sup>1,2</sup>, and Hans Jörnvall<sup>1</sup>

(1) Department of Medical Biochemistry and Biophysics, Karolinska Institutet, SE-17177 Stockholm, Sweden

(2) Department of Surgery, University of Lübeck, D-23538 Lübeck, Germany

(3) Karolinska Biomic Center, Karolinska Institutet, SE-17176 Stockholm, Sweden

(4) Institute of Medical Biometry and Statistics, University of Lübeck, D-23562 Lübeck, Germany

(5) Department of Oncology, Radiumhemmet, Karolinska University Hospital, SE-17176 Stockholm, Sweden

(6) Ludwig Institute for Cancer Research, Ltd., SE-75124 Uppsala, Sweden

Address for correspondence:

Professor Hans Jörnvall, MD  
Department of Medical Biochemistry and Biophysics  
Scheeles väg 2  
Karolinska Institutet  
SE-17177 Stockholm, Sweden  
Phone: +46-8-524 877 02  
Fax: +46-8-33 74 62  
Mail: [Hans.Jornvall@ki.se](mailto:Hans.Jornvall@ki.se)

&

Jens K. Habermann, M.D., Ph.D.  
Laboratory for Surgical Research, Dept. of Surgery  
University Clinic Schleswig-Holstein, Campus Lübeck  
Ratzeburger Allee 160  
D-23538 Lübeck, Germany  
Phone: +49-451-5002676  
Fax: +49-451-5002069  
Mailto: [Jens.Habermann@gmail.com](mailto:Jens.Habermann@gmail.com)

**S2: Clinical parameters of patients included in the study**

| Reference number | Ploidy    | Age | FIGO 1988 | FIGO 2010 | Grade | Histopathology | Observation time [months] | Comments |
|------------------|-----------|-----|-----------|-----------|-------|----------------|---------------------------|----------|
| 116              | Diploid*  |     |           |           |       | Benign         |                           |          |
| 121              | Diploid*  |     |           |           |       | Benign         |                           |          |
| 123              | Diploid*  |     |           |           |       | Benign         |                           |          |
| 125              | Diploid*  |     |           |           |       | Benign         |                           |          |
| 127              | Diploid*  |     |           |           |       | Benign         |                           |          |
| 4                | Diploid   | 67  | 1b        | 1a        | 1     | Endometrioid   | 144                       |          |
| 7                | Diploid   | 84  | 1c        | 1b        | 1     | Endometrioid   | 74                        |          |
| 9                | Diploid   | 60  | 1b        | 1a        | 1     | Endometrioid   | 42                        |          |
| 11               | Diploid   | 56  | 1b        | 1a        | 1     | Endometrioid   | 150                       |          |
| 35               | Diploid   | 53  | 1a        | 1a        | 1     | Endometrioid   | 140                       | Outlier  |
| 66               | Diploid   | 61  | 1a        | 1a        | 1     | Endometrioid   | 113                       |          |
| 69               | Diploid   | 87  | 1c        | 1b        | 2     | Endometrioid   | 15                        |          |
| 12               | Aneuploid | 82  | 1c        | 1b        | 1     | Endometrioid   | 146                       |          |
| 27               | Aneuploid | 77  | 3a        | 3a        | 3     | UPSC           | 36                        | Outlier  |
| 34               | Aneuploid | 47  | 1b        | 1a        | 2     | Endometrioid   | 81                        |          |
| 43               | Aneuploid | 67  | 1c        | 1b        | 3     | UPSC           | 19                        |          |
| 53               | Aneuploid | 80  | 3a        | 3a        | 3     | UPSC           | 27                        |          |
| 63               | Aneuploid | 91  | 3a        | 3a        | 3     | UPSC           | 9                         |          |
| 68               | Aneuploid | 79  | 1c        | 1b        | 3     | Endometrioid   | 15                        |          |

\* Based on clinical routine ploidy assessment of more than 25 normal endometrial samples, diploidy was presumed for normal endometrium tissue

UPSC, uterine papillary serous carcinoma
