# Supplementary material
Source: PubMed Central journal article supplement (PMC11115173)
Supplement: 18_2011_752_MOESM3_ESM.pdf [file 18_2011_752_MOESM3_ESM.pdf]

# **Protein-Profiling of Genomic Instability in Endometrial Cancer**

Timo Gemoll<sup>1,2,3</sup>, Jens K. Habermann<sup>1,2</sup>, Johanna Lahmann<sup>2</sup>,  
Silke Szymczak<sup>4</sup>, Caroline Lundgren<sup>5</sup>, Nana K. Bündgen<sup>2</sup>, Thomas  
Jungbluth<sup>2</sup>, Britta Nordström<sup>5</sup>, Susanne Becker<sup>3</sup>, Marta I. Lomnytska<sup>3,5</sup>,  
Hans-Peter Bruch<sup>2</sup>, Andreas Ziegler<sup>4</sup>, Ulf Hellman<sup>6</sup>, Gert Auer<sup>3</sup>, Uwe J.  
Roblick<sup>1,2</sup>, and Hans Jörnvall<sup>1</sup>

(1) Department of Medical Biochemistry and Biophysics, Karolinska Institutet, SE-17177 Stockholm, Sweden

(2) Department of Surgery, University of Lübeck, D-23538 Lübeck, Germany

(3) Karolinska Biomic Center, Karolinska Institutet, SE-17176 Stockholm, Sweden

(4) Institute of Medical Biometry and Statistics, University of Lübeck, D-23562 Lübeck, Germany

(5) Department of Oncology, Radiumhemmet, Karolinska University Hospital, SE-17176 Stockholm, Sweden

(6) Ludwig Institute for Cancer Research, Ltd., SE-75124 Uppsala, Sweden

Address for correspondence:

Professor Hans Jörnvall, MD  
Department of Medical Biochemistry and Biophysics  
Scheeles väg 2  
Karolinska Institutet  
SE-17177 Stockholm, Sweden  
Phone: +46-8-524 877 02  
Fax: +46-8-33 74 62  
Mail: [Hans.Jornvall@ki.se](mailto:Hans.Jornvall@ki.se)

&

Jens K. Habermann, M.D., Ph.D.  
Laboratory for Surgical Research, Dept. of Surgery  
University Clinic Schleswig-Holstein, Campus Lübeck  
Ratzeburger Allee 160  
D-23538 Lübeck, Germany  
Phone: +49-451-5002676  
Fax: +49-451-5002069  
Mailto: [Jens.Habermann@gmail.com](mailto:Jens.Habermann@gmail.com)

*Two-dimensional gel-electrophoresis*

Before application, 75µg of each sample was diluted to 300µL of 7M urea, 2M thiourea, 1% 3-(3-chloramidopropyl)dimethylammonio-1-propanesulfonate (CHAPS), 0,5% immobilized pH gradient buffer (IPG), 18mM dithiothreitol (DTT) and a trace of bromphenol blue. This mixture was applied to a Ready Strip (17cm, pH 4–7 linear; Bio-Rad) and rehydrated at 50V at 20C for 16h. Proteins were isoelectrically focused stepwise from 500V to 8000V for a total of 52,900Vh per gel. Ready Strips were stored at -80°C until second dimension processing.

After isoelectric focusing, the strips were equilibrated for 2 x 15min with 50mM Tris-HCl, pH 8.8, in 6M urea, 30% glycerol and 2% SDS. DTT (1%) was included in the first and iodacetamide (2.5%) in the second equilibration step to reduce SS-bridges and alkylate thiols. We used 10-13% linear acrylamide gradient gels (1.5 x 200 x 230mm) with 1% SDS for second-dimension gel electrophoresis. The IPG strip was placed on the surface of the second-dimension gel and sealed with 0.5% agarose in SDS-electrophoresis buffer (25mM Tris base, 192mM glycine, 0,1% SDS). The gels were run overnight at 100V, 12C, and then fixed for 2x30 min in 30% ethanol, 10% acetic acid, and sensitized for 30min in 20% ethanol, 0.5M potassium acetate, and 8.3M potassium tetrathionate. After washing with distilled water, the gels were stained in 0.2% silver nitrate for 120min and washed twice in water for 1min each. Development was performed in a solution of 0.22M potassium carbonate, 0.05mM sodium thiosulfate and 0.009% formaldehyde. After 10min, a termination solution of 5% acetic acid was used to stop development, after which the stained gels were washed three times in water for 5min each. They were then scanned by a flatbed

densitometer (GS 710, Bio-Rad) and analyzed with PDQuest 2-DE analysis software (BioRad, CA, USA, version 8.0.1). Image analysis included spot detection, spot editing, background subtraction, spot matching, and normalization.
