# Supplementary material
Source: PubMed Central journal article supplement (PMC11115173)
Supplement: 18_2011_752_MOESM5_ESM.pdf [file 18_2011_752_MOESM5_ESM.pdf]

# **Protein-Profiling of Genomic Instability in Endometrial Cancer**

Timo Gemoll<sup>1,2,3</sup>, Jens K. Habermann<sup>1,2</sup>, Johanna Lahmann<sup>2</sup>,  
Silke Szymczak<sup>4</sup>, Caroline Lundgren<sup>5</sup>, Nana K. Bündgen<sup>2</sup>, Thomas  
Jungbluth<sup>2</sup>, Britta Nordström<sup>5</sup>, Susanne Becker<sup>3</sup>, Marta I. Lomnytska<sup>3,5</sup>,  
Hans-Peter Bruch<sup>2</sup>, Andreas Ziegler<sup>4</sup>, Ulf Hellman<sup>6</sup>, Gert Auer<sup>3</sup>, Uwe J.  
Roblick<sup>1,2</sup>, and Hans Jörnvall<sup>1</sup>

(1) Department of Medical Biochemistry and Biophysics, Karolinska Institutet, SE-17177 Stockholm, Sweden

(2) Department of Surgery, University of Lübeck, D-23538 Lübeck, Germany

(3) Karolinska Biomic Center, Karolinska Institutet, SE-17176 Stockholm, Sweden

(4) Institute of Medical Biometry and Statistics, University of Lübeck, D-23562 Lübeck, Germany

(5) Department of Oncology, Radiumhemmet, Karolinska University Hospital, SE-17176 Stockholm, Sweden

(6) Ludwig Institute for Cancer Research, Ltd., SE-75124 Uppsala, Sweden

Address for correspondence:

Professor Hans Jörnvall, MD  
Department of Medical Biochemistry and Biophysics  
Scheeles väg 2  
Karolinska Institutet  
SE-17177 Stockholm, Sweden  
Phone: +46-8-524 877 02  
Fax: +46-8-33 74 62  
Mail: [Hans.Jornvall@ki.se](mailto:Hans.Jornvall@ki.se)

&

Jens K. Habermann, M.D., Ph.D.  
Laboratory for Surgical Research, Dept. of Surgery  
University Clinic Schleswig-Holstein, Campus Lübeck  
Ratzeburger Allee 160  
D-23538 Lübeck, Germany  
Phone: +49-451-5002676  
Fax: +49-451-5002069  
Mailto: [Jens.Habermann@gmail.com](mailto:Jens.Habermann@gmail.com)

*Confirmation by LC-MS/MS*

Picked protein spots were processed and digested with trypsin using a robotic protein handling system (MassPREP, Waters) as specified above. Peptides were extracted with 30 $\mu$ L 5% formic acid / 2% acetonitrile, followed by extraction with 24 $\mu$ L 2.5% formic acid / 50% acetonitrile. Tryptic fragments were analyzed using a quadrupole time-of-flight mass spectrometer (Q-TOF Premier API, Waters, Milford, MA, USA) with a standard Z-spray source coupled to a Waters nanoAcquity system. The eluate from the CapLC system was electrosprayed using a PicoTip EMITTER (SilicaTip, New Objective Inc). Samples were desalted with a Waters Symmetry C18 column using 100% water / 0.1% formic acid with a flow rate of 15 $\mu$ L/min. Peptides were then separated on the analytical column (BEH C18, Waters) with a solvent system of 100% water / 0.1% formic acid (solvent 1) and 100% acetonitrile / 0.1% formic acid (solvent 2). Finally, the columns were washed 30min with a linear gradient of 3-60% solvent 2 at a flow rate of 300nL/min. The capillary voltage was 2.3kV, the cone and the extraction cone energy voltage were 40 and 2.5V, respectively. The collision gas was argon. Multiply charged ions were selected for collision-induced dissociation using automated switching between MS and MS/MS modes. DDA (Data Dependent Acquisition) was used over a mass range between 300-2000 $m/z$  with a scan time of 1 minute. The collision energy was automatically alternated between 25 to 45eV depending on the mass and charge states for MS/MS. Data analysis was performed using PLGS 2.3 (ProteinLynx Global SERVER 2.3, Waters) software and MassLynx peptide sequence software (version 4.0, Waters).
