# Supplementary material
Source: PubMed Central journal article supplement (PMC11115173)

**S6: PCA map of the protein expression data.** Included are 69 identified proteins that were able to group normal endometrium (black), diploid- (red) and aneuploid- (green) endometrioid-carcinoma and aneuploid UPSC (blue) after outlier removal. X- and y-axis show first and second principal components that explain 68.2% of the variance in the data.

**S6**

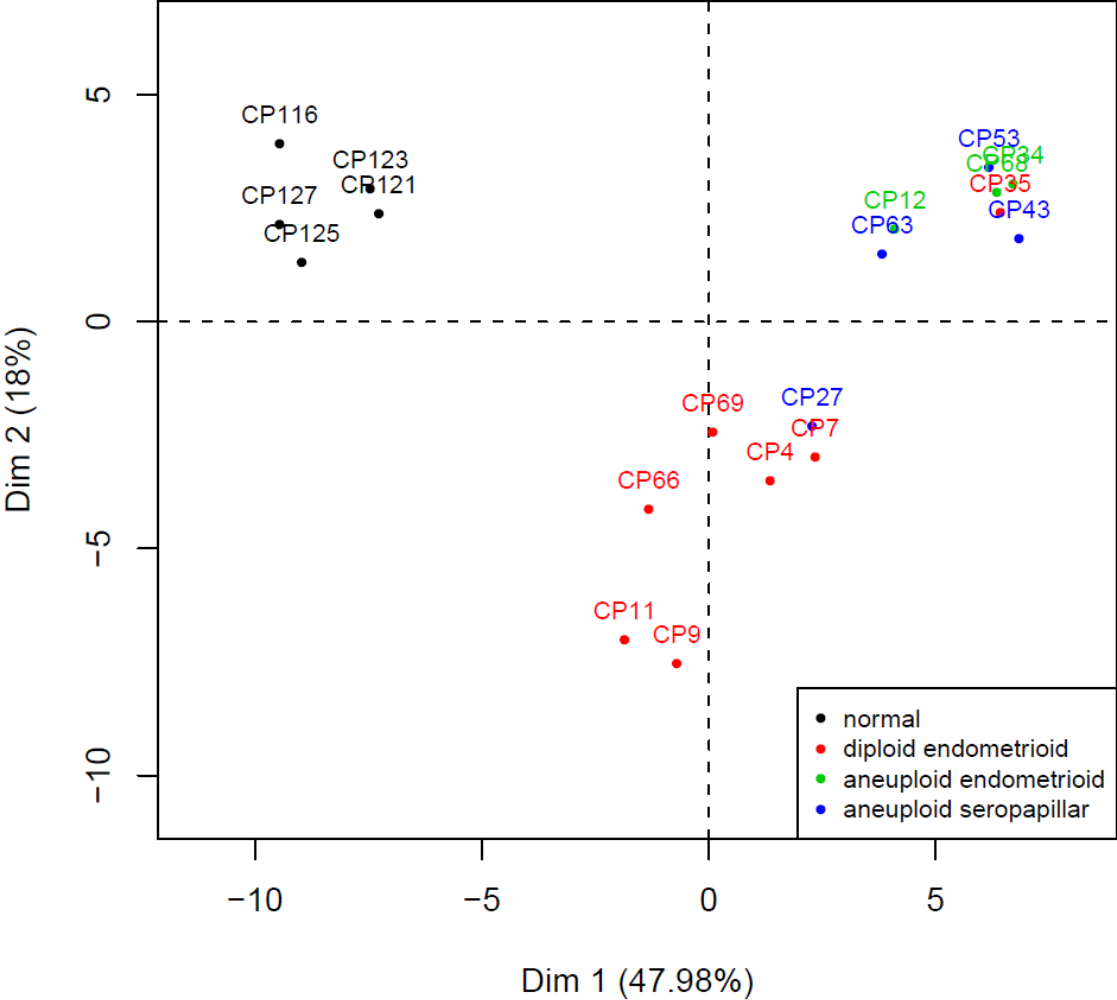

Supplement: 18_2011_752_MOESM6_ESM.pdf [file 18_2011_752_MOESM6_ESM.pdf]
