# Supplementary material
Source: PubMed Central journal article supplement (PMC11115173)
Supplement: 18_2011_752_MOESM7_ESM.pdf [file 18_2011_752_MOESM7_ESM.pdf]

# **Protein-Profiling of Genomic Instability in Endometrial Cancer**

Timo Gemoll<sup>1,2,3</sup>, Jens K. Habermann<sup>1,2</sup>, Johanna Lahmann<sup>2</sup>,  
Silke Szymczak<sup>4</sup>, Caroline Lundgren<sup>5</sup>, Nana K. Bündgen<sup>2</sup>, Thomas  
Jungbluth<sup>2</sup>, Britta Nordström<sup>5</sup>, Susanne Becker<sup>3</sup>, Marta I. Lomnytska<sup>3,5</sup>,  
Hans-Peter Bruch<sup>2</sup>, Andreas Ziegler<sup>4</sup>, Ulf Hellman<sup>6</sup>, Gert Auer<sup>3</sup>, Uwe J.  
Roblick<sup>1,2</sup>, and Hans Jörnvall<sup>1</sup>

(1) Department of Medical Biochemistry and Biophysics, Karolinska Institutet, SE-17177 Stockholm, Sweden

(2) Department of Surgery, University of Lübeck, D-23538 Lübeck, Germany

(3) Karolinska Biomic Center, Karolinska Institutet, SE-17176 Stockholm, Sweden

(4) Institute of Medical Biometry and Statistics, University of Lübeck, D-23562 Lübeck, Germany

(5) Department of Oncology, Radiumhemmet, Karolinska University Hospital, SE-17176 Stockholm, Sweden

(6) Ludwig Institute for Cancer Research, Ltd., SE-75124 Uppsala, Sweden

Address for correspondence:

Professor Hans Jörnvall, MD  
Department of Medical Biochemistry and Biophysics  
Scheeles väg 2  
Karolinska Institutet  
SE-17177 Stockholm, Sweden  
Phone: +46-8-524 877 02  
Fax: +46-8-33 74 62  
Mail: [Hans.Jornvall@ki.se](mailto:Hans.Jornvall@ki.se)

&

Jens K. Habermann, M.D., Ph.D.  
Laboratory for Surgical Research, Dept. of Surgery  
University Clinic Schleswig-Holstein, Campus Lübeck  
Ratzeburger Allee 160  
D-23538 Lübeck, Germany  
Phone: +49-451-5002676  
Fax: +49-451-5002069  
Mailto: [Jens.Habermann@gmail.com](mailto:Jens.Habermann@gmail.com)

**S7: Identifications of the normal endometrium versus diploid endometrioid-carcinoma analysis**

| SSP                                                     | Gene symbol | Protein name                                  | Accession number | Sequence coverage (%) | Matched/ searched peptides | Score                | N vs. De | De vs. Ae | Ae vs. Au | De vs. Au | Trend (N-De-Ae-Au) | Fold change (logarithmized) |
|---------------------------------------------------------|-------------|-----------------------------------------------|------------------|-----------------------|----------------------------|----------------------|----------|-----------|-----------|-----------|--------------------|-----------------------------|
| <b>Lower expression in diploid endometrioid cancer</b>  |             |                                               |                  |                       |                            |                      |          |           |           |           |                    |                             |
| 2117                                                    | ARHGDI2     | Rho GDP dissociation inhibitor (GDI) alpha    | NP_004300        | 35                    | 8/54                       | 4.2x10 <sup>-3</sup> | ↓        |           |           |           |                    | 0.77                        |
| 3221                                                    | CLIC1       | Chloride intracellular channel protein 1      | NP_001279        | 40                    | 8/41                       | 2.3x10 <sup>-3</sup> | ↓        |           |           |           |                    | 0.79                        |
| 3602                                                    | VIM         | Vimentin                                      | NP_003371        | 39                    | 17/58                      | 3.9x10 <sup>-5</sup> | ↓        |           |           |           |                    | 0.75                        |
| 4621                                                    | DES         | Desmin                                        | NP_001918        | 39                    | 14/66                      | 1.1x10 <sup>-3</sup> | ↓        |           |           |           |                    | 0.58                        |
| 5217                                                    | DDAH2       | Dimethylarginine dimethylaminohydrolase 2     | NP_039268        | 27                    | 9/50                       | 3.5x10 <sup>-3</sup> | ↓        |           |           |           |                    | 0.72                        |
| 5304                                                    | CAPZA1      | F-actin-capping protein subunit alpha-1       | NP_006126        | 35                    | 6/56                       | 0.23                 | ↓        |           |           |           |                    | 0.88                        |
| 7451                                                    | MPST        | Mercaptopyruvate sulfurtransferase isoform 2  | NP_001013454     | 23                    | 5/31                       | 0.018                | ↓        |           |           |           |                    | 0.61                        |
| 7537                                                    | CRKL        | Crk-like protein                              | NP_005198        | 32                    | 8/38                       | 8.2x10 <sup>-4</sup> | ↓        |           |           |           |                    | 0.58                        |
| 8101                                                    | PARK7       | Parkinson disease protein 7                   | NP_009193        | 61                    | 10/59                      | 1.4x10 <sup>-4</sup> | ↓        |           |           |           |                    | 0.76                        |
| 8507                                                    | GDI2        | Rab GDP dissociation inhibitor beta isoform 1 | NP_001485        | 39                    | 14/60                      | 2.5x10 <sup>-3</sup> | ↓        |           |           |           |                    | 0.80                        |
| 8514                                                    | SEPT2       | Septin-2                                      | NP_004395        | 32                    | 10/50                      | 4.3x10 <sup>-4</sup> | ↓        |           |           |           |                    | 0.67                        |
| 8609                                                    | CCT2        | Chaperonin containing TCP1, subunit 2         | NP_006422        | 30                    | 12/41                      | 1.8x10 <sup>-5</sup> | ↓        |           |           |           |                    | 0.77                        |
| <b>Higher expression in diploid endometrioid cancer</b> |             |                                               |                  |                       |                            |                      |          |           |           |           |                    |                             |
| 1342                                                    | KRT7        | Keratin 7                                     | AAH02700         | 16                    | 7/39                       | 0.080                | ↑        |           |           |           |                    | 1.62                        |
| 3503                                                    | ACTB        | β-actin                                       | AAH12854         | 28                    | 7/33                       | 9.7x10 <sup>-3</sup> | ↑        |           |           |           |                    | 1.13                        |
| 4005                                                    | RBP4        | Retinol binding protein 4                     | AAH20633         | 36                    | 5/60                       | 0.12                 | ↑        |           |           |           |                    | 1.41                        |
| 4011                                                    | RAB1B       | RAB IB                                        | NP_112243        | 28                    | 5/33                       | 7.0x10 <sup>-5</sup> | ↑        |           |           |           |                    | 1.34                        |
| 4207                                                    | ATP5B       | ATP-Synthase 5B                               | NP_001677        | 15                    | 5/43                       | 0.073                | ↑        |           |           |           |                    | 1.11                        |
| 4611                                                    | HSPD1       | HSP60                                         | AAA36022         | 21                    | 8/75                       | 0.65                 | ↑        |           |           |           | ↑                  | 1.28                        |
| 5424                                                    | KRT10       | Keratin 10 <sup>a</sup>                       | AAH34697         | 15                    | 6/47                       | 0.23                 | ↑        |           |           |           |                    | 1.35                        |

<sup>a</sup> One protein (KRT10) was identified out of at least two protein spots and showed non homogenous up- or down regulation between groups due to possible post-translational modification and was thus excluded from pathway analysis.

SSP, Individual identification number for protein spots analysis software; N, normal ; De, diploid endometrioid ; Ae, aneuploid endometrioid ; Au, aneuploid UPSC
