# Supplementary material
Source: PubMed Central journal article supplement (PMC11115173)
Supplement: 18_2011_752_MOESM8_ESM.pdf [file 18_2011_752_MOESM8_ESM.pdf]

# **Protein-Profiling of Genomic Instability in Endometrial Cancer**

Timo Gemoll<sup>1,2,3</sup>, Jens K. Habermann<sup>1,2</sup>, Johanna Lahmann<sup>2</sup>,  
Silke Szymczak<sup>4</sup>, Caroline Lundgren<sup>5</sup>, Nana K. Bündgen<sup>2</sup>, Thomas  
Jungbluth<sup>2</sup>, Britta Nordström<sup>5</sup>, Susanne Becker<sup>3</sup>, Marta I. Lomnytska<sup>3,5</sup>,  
Hans-Peter Bruch<sup>2</sup>, Andreas Ziegler<sup>4</sup>, Ulf Hellman<sup>6</sup>, Gert Auer<sup>3</sup>, Uwe J.  
Roblick<sup>1,2</sup>, and Hans Jörnvall<sup>1</sup>

(1) Department of Medical Biochemistry and Biophysics, Karolinska Institutet, SE-17177 Stockholm, Sweden

(2) Department of Surgery, University of Lübeck, D-23538 Lübeck, Germany

(3) Karolinska Biomic Center, Karolinska Institutet, SE-17176 Stockholm, Sweden

(4) Institute of Medical Biometry and Statistics, University of Lübeck, D-23562 Lübeck, Germany

(5) Department of Oncology, Radiumhemmet, Karolinska University Hospital, SE-17176 Stockholm, Sweden

(6) Ludwig Institute for Cancer Research, Ltd., SE-75124 Uppsala, Sweden

Address for correspondence:

Professor Hans Jörnvall, MD  
Department of Medical Biochemistry and Biophysics  
Scheeles väg 2  
Karolinska Institutet  
SE-17177 Stockholm, Sweden  
Phone: +46-8-524 877 02  
Fax: +46-8-33 74 62  
Mail: [Hans.Jornvall@ki.se](mailto:Hans.Jornvall@ki.se)

&

Jens K. Habermann, M.D., Ph.D.  
Laboratory for Surgical Research, Dept. of Surgery  
University Clinic Schleswig-Holstein, Campus Lübeck  
Ratzeburger Allee 160  
D-23538 Lübeck, Germany  
Phone: +49-451-5002676  
Fax: +49-451-5002069  
Mailto: [Jens.Habermann@gmail.com](mailto:Jens.Habermann@gmail.com)

**S8: Overview of top networks**

| Comparison                                                                 | Network Eligible | Up-regulated | Down-regulated | Top networks                                                                                                           | Score | Top Diseases and Disorders | p-Value  | # of Molecules | Molecular and Cellular Functions   | p-Value  | # of Molecules |
|----------------------------------------------------------------------------|------------------|--------------|----------------|------------------------------------------------------------------------------------------------------------------------|-------|----------------------------|----------|----------------|------------------------------------|----------|----------------|
| normal vs. diploid (e) <sup>a</sup>                                        | 18               | 6            | 12             | Nucleic Acid Metabolism, Small Molecule Biochemistry, Cellular Assembly and Organization                               | 33    | Cancer                     | < 0.046  | 9              | Cell Signaling                     | < 0.0431 | 6              |
|                                                                            |                  |              |                | Cardiovascular System Development and Function, Cell Morphology, Skeletal and Muscular System Development and Function | 10    | Neurological Disease       | < 0.0399 | 3              | Cellular Movement                  | < 0.0496 | 6              |
|                                                                            |                  |              |                |                                                                                                                        |       | Genetic Disorder           | < 0.0464 | 6              | Cell Morphology                    | < 0.0339 | 5              |
| diploid (e) vs. aneuploid (e) <sup>b</sup>                                 | 10               | 8            | 2              | Cellular Assembly and Organization, Nucleic Acid Metabolism, Small Molecule Biochemistry                               | 25    | Neurological Disease       | < 0.0106 | 7              | Cellular Growth and Proliferation  | < 0.0382 | 7              |
|                                                                            |                  |              |                |                                                                                                                        |       | Genetic Disorder           | < 0.0486 | 8              | Cell Morphology                    | < 0.0297 | 4              |
|                                                                            |                  |              |                |                                                                                                                        |       | Cancer                     | < 0.0394 | 7              | Cellular Assembly and Organization | < 0.0346 | 6              |
| diploid (e) vs. aneuploid (UPSC) <sup>c</sup>                              | 9                | 5            | 4              | Lipid Metabolism, Small Molecule Biochemistry, Cell Morphology                                                         | 25    | Cancer                     | < 0.0428 | 7              | Amino Acid Metabolism              | < 0.0150 | 2              |
|                                                                            |                  |              |                |                                                                                                                        |       | Gastrointestinal Disease   | < 0.0214 | 4              | Cell Morphology                    | < 0.010  | 1              |
|                                                                            |                  |              |                |                                                                                                                        |       | Inflammatory Disease       | < 0.0479 | 2              | Cellular Assembly and Organization | < 0.0125 | 2              |
| normal vs. diploid (e) vs. aneuploid (e) vs. aneuploid (UPSC) <sup>d</sup> | 14               | 10           | 4              | Cellular Function and Maintenance, Cellular Compromise, Nucleic Acid Metabolism                                        | 29    | Cancer                     | < 0.0478 | 10             | Cellular Function and Maintenance  | < 0.0379 | 7              |
|                                                                            |                  |              |                | Lipid Metabolism, Molecular Transport, Small Molecule Biochemistry                                                     | 18    | Gastrointestinal Disease   | < 0.0068 | 6              | Cellular Compromise                | < 0.0217 | 5              |
|                                                                            |                  |              |                |                                                                                                                        |       | Inflammatory Response      | < 0.0363 | 2              | Antigen Presentation               | < 0.0002 | 2              |

<sup>a, b, c</sup> pairwise analysis      <sup>d</sup> trend analysis

e, endometrioid; UPSC, uterine papillary serous carcinoma
