# Supplementary material
Source: PubMed Central journal article supplement (PMC11115173)
Supplement: 18_2011_752_MOESM9_ESM.pdf [file 18_2011_752_MOESM9_ESM.pdf]

# **Protein-Profiling of Genomic Instability in Endometrial Cancer**

Timo Gemoll<sup>1,2,3</sup>, Jens K. Habermann<sup>1,2</sup>, Johanna Lahmann<sup>2</sup>,  
Silke Szymczak<sup>4</sup>, Caroline Lundgren<sup>5</sup>, Nana K. Bündgen<sup>2</sup>, Thomas  
Jungbluth<sup>2</sup>, Britta Nordström<sup>5</sup>, Susanne Becker<sup>3</sup>, Marta I. Lomnytska<sup>3,5</sup>,  
Hans-Peter Bruch<sup>2</sup>, Andreas Ziegler<sup>4</sup>, Ulf Hellman<sup>6</sup>, Gert Auer<sup>3</sup>, Uwe J.  
Roblick<sup>1,2</sup>, and Hans Jörnvall<sup>1</sup>

(1) Department of Medical Biochemistry and Biophysics, Karolinska Institutet, SE-17177 Stockholm, Sweden

(2) Department of Surgery, University of Lübeck, D-23538 Lübeck, Germany

(3) Karolinska Biomic Center, Karolinska Institutet, SE-17176 Stockholm, Sweden

(4) Institute of Medical Biometry and Statistics, University of Lübeck, D-23562 Lübeck, Germany

(5) Department of Oncology, Radiumhemmet, Karolinska University Hospital, SE-17176 Stockholm, Sweden

(6) Ludwig Institute for Cancer Research, Ltd., SE-75124 Uppsala, Sweden

Address for correspondence:

Professor Hans Jörnvall, MD  
Department of Medical Biochemistry and Biophysics  
Scheeles väg 2  
Karolinska Institutet  
SE-17177 Stockholm, Sweden  
Phone: +46-8-524 877 02  
Fax: +46-8-33 74 62  
Mail: [Hans.Jornvall@ki.se](mailto:Hans.Jornvall@ki.se)

&

Jens K. Habermann, M.D., Ph.D.  
Laboratory for Surgical Research, Dept. of Surgery  
University Clinic Schleswig-Holstein, Campus Lübeck  
Ratzeburger Allee 160  
D-23538 Lübeck, Germany  
Phone: +49-451-5002676  
Fax: +49-451-5002069  
Mailto: [Jens.Habermann@gmail.com](mailto:Jens.Habermann@gmail.com)

**S9: Identifications of the diploid- versus aneuploid endometrioid-carcinoma analysis**

| SSP                                                       | Gene symbol | Protein name                                               | Accession number | Sequence coverage (%) | Matched/ searched peptides | Score                 | N vs. De | De vs. Ae | Ae vs. Au | De vs. Au | Trend (N-De-Ae-Au) | Fold change (logarithmized) |
|-----------------------------------------------------------|-------------|------------------------------------------------------------|------------------|-----------------------|----------------------------|-----------------------|----------|-----------|-----------|-----------|--------------------|-----------------------------|
| <b>Lower expression in aneuploid endometrioid cancer</b>  |             |                                                            |                  |                       |                            |                       |          |           |           |           |                    |                             |
| 1501                                                      | VIM         | Vimentin                                                   | AAA61279         | 68                    | 39/96                      | $2.8 \times 10^{-5}$  |          | ↓         |           |           | ↓                  | 0.80                        |
| 7815                                                      | LMNA        | Laminin-A/C isoform 1                                      | NP_733821        | 31                    | 16/39                      | $3.8 \times 10^{-7}$  |          | ↓         |           |           |                    | 0.34                        |
| 8620                                                      | PDIA3       | Protein disulfide-isomerase family A member 3 <sup>a</sup> | NP_005304        | 27                    | 14/42                      | $7.6 \times 10^{-5}$  |          | ↓         |           |           |                    | 0.66                        |
| <b>Higher expression in aneuploid endometrioid cancer</b> |             |                                                            |                  |                       |                            |                       |          |           |           |           |                    |                             |
| 615                                                       | KRT10       | Keratin 10 <sup>a</sup>                                    | AAH34697         | 33                    | 20/80                      | $5.1 \times 10^{-7}$  |          | ↑         |           |           |                    | 1.68                        |
| 1210                                                      | KRT9        | Cytokeratin 9 <sup>a</sup>                                 | NP_000217        | 24                    | 8/47                       | $9.2 \times 10^{-3}$  |          | ↑         |           |           |                    | 1.38                        |
| 1313                                                      | ACTB        | β-actin                                                    | AAH12854         | 28                    | 7/33                       | $1.8 \times 10^{-3}$  |          | ↑         |           |           | ↑                  | 1.17                        |
| 2006                                                      | THEMIS      | Thymocyte selection associated                             | CAI13396         | 14                    | 7/74                       | 0.32                  |          | ↑         |           |           |                    | 2.03                        |
| 2007                                                      | ACTB        | β-actin                                                    | AAH12854         | 28                    | 7/33                       | $9.4 \times 10^{-3}$  |          | ↑         |           | ↑         | ↑                  | 1.55                        |
| 2120                                                      | ACTB        | β-actin                                                    | AAH12854         | 28                    | 7/33                       | 0.55                  |          | ↑         |           |           |                    | 1.29                        |
| 2623                                                      | ATP5B       | ATP-Synthase 5B                                            | NP_001677        | 15                    | 5/43                       | $4.7 \times 10^{-11}$ |          | ↑         |           |           |                    | 1.08                        |
| 3230                                                      | ACTB        | ACTB                                                       | AAH12854         | 28                    | 7/33                       | 0.080                 |          | ↑         |           | ↑         |                    | 1.15                        |
| 3314                                                      | ATP5B       | ATP-Synthase 5B                                            | NP_001677        | 15                    | 5/43                       | 0.071                 |          | ↑         |           |           |                    | 1.42                        |
| 3505                                                      | ATP5B       | ATP-Synthase 5B                                            | NP_001677        | 15                    | 5/43                       | $3.2 \times 10^{-3}$  |          | ↑         |           |           |                    | 1.16                        |
| 3806                                                      | HSPA5       | HSP70 protein 5                                            | NP_005338        | 26                    | 14/100                     | $1.6 \times 10^{-3}$  |          | ↑         |           |           |                    | 1.32                        |
| 4006                                                      | ACTG1       | γ-actin                                                    | AAH10417         | 31                    | 4/46                       | 0.21                  |          | ↑         |           | ↑         | ↑                  | 1.37                        |
| 4107                                                      | HSPB1       | HSP27                                                      | NP_001531        | 33                    | 7/49                       | 0.037                 |          | ↑         |           |           |                    | 1.21                        |
| 4419                                                      | ALB         | Albumin                                                    | NP_000468        | 19                    | 12/48                      | $2.8 \times 10^{-5}$  |          | ↑         |           | ↑         |                    | 1.30                        |
| 5104                                                      | ACTB        | β-actin                                                    | AAH12854         | 28                    | 7/33                       | $2.0 \times 10^{-7}$  |          | ↑         |           | ↑         | ↑                  | 1.16                        |
| 5230                                                      | ANXA2       | Annexin A2                                                 | AAH09564         | 43                    | 15/53                      | $2.9 \times 10^{-4}$  |          | ↑         |           | ↑         | ↑                  | 1.24                        |
| 7123                                                      | GRB2        | Growth factor receptor-bound protein 2                     | NP_002077        | 21                    | 6/45                       | 0.021                 |          | ↑         |           |           |                    | 1.17                        |

<sup>a</sup> Three proteins (KRT10, KRT9, and PDIA3) were identified out of at least two protein spots and showed non homogenous up- or down regulation between groups due to possible post-translational modification and were thus excluded from all pathway analysis.

SSP, Individual identification number for protein spots analysis software; N, normal ; De, diploid endometrioid ; Ae, aneuploid endometrioid ; Au, aneuploid UPSC
