# Supplementary material
Source: PubMed Central journal article supplement (PMC11115173)
Supplement: 18_2011_752_MOESM10_ESM.pdf [file 18_2011_752_MOESM10_ESM.pdf]

# **Protein-Profiling of Genomic Instability in Endometrial Cancer**

Timo Gemoll<sup>1,2,3</sup>, Jens K. Habermann<sup>1,2</sup>, Johanna Lahmann<sup>2</sup>,  
Silke Szymczak<sup>4</sup>, Caroline Lundgren<sup>5</sup>, Nana K. Bündgen<sup>2</sup>, Thomas  
Jungbluth<sup>2</sup>, Britta Nordström<sup>5</sup>, Susanne Becker<sup>3</sup>, Marta I. Lomnytska<sup>3,5</sup>,  
Hans-Peter Bruch<sup>2</sup>, Andreas Ziegler<sup>4</sup>, Ulf Hellman<sup>6</sup>, Gert Auer<sup>3</sup>, Uwe J.  
Roblick<sup>1,2</sup>, and Hans Jörnvall<sup>1</sup>

(1) Department of Medical Biochemistry and Biophysics, Karolinska Institutet, SE-17177 Stockholm, Sweden

(2) Department of Surgery, University of Lübeck, D-23538 Lübeck, Germany

(3) Karolinska Biomic Center, Karolinska Institutet, SE-17176 Stockholm, Sweden

(4) Institute of Medical Biometry and Statistics, University of Lübeck, D-23562 Lübeck, Germany

(5) Department of Oncology, Radiumhemmet, Karolinska University Hospital, SE-17176 Stockholm, Sweden

(6) Ludwig Institute for Cancer Research, Ltd., SE-75124 Uppsala, Sweden

Address for correspondence:

Professor Hans Jörnvall, MD  
Department of Medical Biochemistry and Biophysics  
Scheeles väg 2  
Karolinska Institutet  
SE-17177 Stockholm, Sweden  
Phone: +46-8-524 877 02  
Fax: +46-8-33 74 62  
Mail: [Hans.Jornvall@ki.se](mailto:Hans.Jornvall@ki.se)

&

Jens K. Habermann, M.D., Ph.D.  
Laboratory for Surgical Research, Dept. of Surgery  
University Clinic Schleswig-Holstein, Campus Lübeck  
Ratzeburger Allee 160  
D-23538 Lübeck, Germany  
Phone: +49-451-5002676  
Fax: +49-451-5002069  
Mailto: [Jens.Habermann@gmail.com](mailto:Jens.Habermann@gmail.com)

**S10: Identifications of the diploid endometrioid-cancer versus aneuploid UPSC analysis**

| SSP                                        | Gene symbol | Protein name                                        | Accession number | Sequence coverage (%) | Matched/ searched peptides | Score                | N vs. De | De vs. Ae | Ae vs. Au | De vs. Au | Trend (N-De-Ae-Au) | Fold change (logarithmized) |
|--------------------------------------------|-------------|-----------------------------------------------------|------------------|-----------------------|----------------------------|----------------------|----------|-----------|-----------|-----------|--------------------|-----------------------------|
| <b>Lower expression in aneuploid UPSC</b>  |             |                                                     |                  |                       |                            |                      |          |           |           |           |                    |                             |
| 1607                                       | P4HB        | Prolyl 4-hydroxylase, beta polypeptide              | NP_000909        | 26                    | 11/46                      | $2.2 \times 10^{-3}$ |          |           |           | ↓         |                    | 0.88                        |
| 2302                                       | ANXA5       | Annexin A5 <sup>a</sup>                             | NP_001145        | 56                    | 19/96                      | $5.3 \times 10^{-4}$ |          |           |           | ↓         | ↓                  | 0.86                        |
| 3009                                       | RAB18       | RAB18                                               | NP_067075        | 30                    | 6/68                       | 0.10                 |          |           |           | ↓         |                    | 0.85                        |
| 5703                                       | HNRNPK      | Heterogeneous nuclear ribonucleoprotein K isoform a | NP_112553        | 36                    | 14/57                      | $2.2 \times 10^{-5}$ |          |           |           | ↓         |                    | 0.40                        |
| 9301                                       | AKR7A2      | Aflatoxin B1 aldehyd reductase member 2             | NP_003680        | 32                    | 11/37                      | $3.2 \times 10^{-5}$ |          |           |           | ↓         |                    | 0.62                        |
| <b>Higher expression in aneuploid UPSC</b> |             |                                                     |                  |                       |                            |                      |          |           |           |           |                    |                             |
| 2003                                       | ANXA5       | Annexin A5 <sup>a</sup>                             | NP_001145        | 21                    | 8/48                       | $7.8 \times 10^{-3}$ |          |           |           | ↑         |                    | 1.37                        |
| 2007                                       | ACTB        | β-actin                                             | AAH12854         | 28                    | 7/33                       | $9.4 \times 10^{-3}$ |          | ↑         |           | ↑         | ↑                  | 1.63                        |
| 2111                                       | HSP90AB1    | HSP90 alpha (cytosolic), class B <sup>a</sup>       | NP_031381        | 28                    | 17/57                      | 0.16                 |          |           |           | ↑         | ↑                  | 1.30                        |
| 3230                                       | ACTB        | β-actin                                             | AAH12854         | 28                    | 7/33                       | 0.080                |          | ↑         |           | ↑         | ↑                  | 1.17                        |
| 4006                                       | ACTG1       | γ-actin                                             | AAH10417         | 31                    | 4/46                       | 0.21                 |          | ↑         |           | ↑         | ↑                  | 1.35                        |
| 4315                                       | PDIA6       | Prot disulfide-isomerase A6                         | NP_005733        | 31                    | 9/52                       | $7.3 \times 10^{-4}$ |          |           |           | ↑         | ↑                  | 1.33                        |
| 4419                                       | ALB         | Albumin                                             | NP_000468        | 19                    | 12/48                      | $2.8 \times 10^{-5}$ |          | ↑         |           | ↑         | ↑                  | 1.31                        |
| 5104                                       | ACTB        | β-actin                                             | AAH12854         | 28                    | 7/33                       | $2.0 \times 10^{-7}$ |          | ↑         |           | ↑         | ↑                  | 1.20                        |
| 5107                                       | PRDX4       | Peroxiredoxin-4                                     | NP_006397        | 31                    | 5/45                       | 0.21                 |          |           |           | ↑         |                    | 1.28                        |
| 5230                                       | ANXA2       | Annexin A2                                          | AAH09564         | 43                    | 15/53                      | $2.9 \times 10^{-4}$ |          | ↑         |           | ↑         | ↑                  | 1.33                        |

<sup>a</sup> Two proteins (ANXA5 and HSP90AB1) were identified out of at least two protein spots and showed non homogenous up- or down regulation between groups due to possible post-translational modification and were thus excluded from all pathway analysis.

SSP, Individual identification number for protein spots analysis software; N, normal ; De, diploid endometrioid ; Ae, aneuploid endometrioid ; Au, aneuploid UPSC
