# Supplementary material
Source: PubMed Central journal article supplement (PMC11115173)
Supplement: 18_2011_752_MOESM11_ESM.pdf [file 18_2011_752_MOESM11_ESM.pdf]

# Protein-Profiling of Genomic Instability in Endometrial Cancer

Timo Gemoll<sup>1,2,3</sup>, Jens K. Habermann<sup>1,2</sup>, Johanna Lahmann<sup>2</sup>,  
Silke Szymczak<sup>4</sup>, Caroline Lundgren<sup>5</sup>, Nana K. Bündgen<sup>2</sup>, Thomas  
Jungbluth<sup>2</sup>, Britta Nordström<sup>5</sup>, Susanne Becker<sup>3</sup>, Marta I. Lomnytska<sup>3,5</sup>,  
Hans-Peter Bruch<sup>2</sup>, Andreas Ziegler<sup>4</sup>, Ulf Hellman<sup>6</sup>, Gert Auer<sup>3</sup>, Uwe J.  
Roblick<sup>1,2</sup>, and Hans Jörnvall<sup>1</sup>

(1) Department of Medical Biochemistry and Biophysics, Karolinska Institutet, SE-17177 Stockholm, Sweden

(2) Department of Surgery, University of Lübeck, D-23538 Lübeck, Germany

(3) Karolinska Biomic Center, Karolinska Institutet, SE-17176 Stockholm, Sweden

(4) Institute of Medical Biometry and Statistics, University of Lübeck, D-23562 Lübeck, Germany

(5) Department of Oncology, Radiumhemmet, Karolinska University Hospital, SE-17176 Stockholm, Sweden

(6) Ludwig Institute for Cancer Research, Ltd., SE-75124 Uppsala, Sweden

Address for correspondence:

Professor Hans Jörnvall, MD  
Department of Medical Biochemistry and Biophysics  
Scheeles väg 2  
Karolinska Institutet  
SE-17177 Stockholm, Sweden  
Phone: +46-8-524 877 02  
Fax: +46-8-33 74 62  
Mail: [Hans.Jornvall@ki.se](mailto:Hans.Jornvall@ki.se)

&

Jens K. Habermann, M.D., Ph.D.  
Laboratory for Surgical Research, Dept. of Surgery  
University Clinic Schleswig-Holstein, Campus Lübeck  
Ratzeburger Allee 160  
D-23538 Lübeck, Germany  
Phone: +49-451-5002676  
Fax: +49-451-5002069  
Mailto: [Jens.Habermann@gmail.com](mailto:Jens.Habermann@gmail.com)

| SSP 210         | SSP 215         | SSP 229         | SSP 1501        | SSP 1607        | SSP 2117        |
|-----------------|-----------------|-----------------|-----------------|-----------------|-----------------|
| 842.5094000000  | 830.4599433432  | 830.4557854032  | 842.5094000001  | 842.5094000000  | 842.5132634445  |
| 870.5351783854  | 842.5102962501  | 832.4890796970  | 870.5224167503  | 855.0552328281  | 855.0556964446  |
| 1045.5599575595 | 870.5387691073  | 842.5121164161  | 905.4327202366  | 861.0733371322  | 856.5203355836  |
| 1070.5594615295 | 1045.5623294743 | 864.4759775345  | 906.4676449785  | 870.5360626684  | 861.0724493480  |
| 1082.5928112009 | 1170.6572475908 | 870.5415890615  | 932.4687027958  | 910.4445154224  | 870.5429035125  |
| 1106.5623751126 | 1179.5948259682 | 948.4425164886  | 969.4526184482  | 920.4290081287  | 877.0429345862  |
| 1179.5927270258 | 1189.6564292189 | 1037.5661486246 | 1045.5636999999 | 962.4549921214  | 949.5443574791  |
| 1216.5690561015 | 1198.6879883286 | 1043.5435601947 | 1046.5399368645 | 966.5605221959  | 977.5423993107  |
| 1234.6623834904 | 1199.6668245552 | 1045.5595081837 | 1060.5572201375 | 1024.5518566059 | 980.5011303243  |
| 1307.6671643344 | 1205.6560438116 | 1092.5265527944 | 1062.5383881654 | 1045.5592527496 | 1020.5369299961 |
| 1320.5890336275 | 1218.6427316306 | 1111.5699194280 | 1068.5155104240 | 1066.5112223202 | 1045.5665844534 |
| 1383.6796118312 | 1227.6630149115 | 1126.5164347767 | 1076.5102886424 | 1106.0613859628 | 1076.6107661161 |
| 1434.7625539781 | 1243.6493628452 | 1179.5984936781 | 1088.5413753680 | 1106.5664212827 | 1104.6160327571 |
| 1475.7472854757 | 1256.5880586625 | 1195.6601254487 | 1093.5325507081 | 1109.5659773552 | 1106.0688072413 |
| 1493.7253365387 | 1267.7006999397 | 1232.5931628877 | 1107.5637673440 | 1127.5776577304 | 1106.5758850129 |
| 1523.7653811060 | 1298.7640898477 | 1252.5888429826 | 1109.5306582250 | 1142.5933528774 | 1142.6079193764 |
| 1529.7259720913 | 1307.6696512843 | 1267.6998970867 | 1115.5745277969 | 1156.6034385465 | 1163.6133023850 |
| 1546.6950834864 | 1326.7557098212 | 1307.6782690918 | 1121.5942984183 | 1176.5476429893 | 1197.6729956273 |
| 1572.8120220719 | 1365.6425879771 | 1320.5781293594 | 1125.5958588230 | 1179.5858685174 | 1245.5646041860 |
| 1638.8490848949 | 1384.6833858097 | 1339.6159992962 | 1151.5536824320 | 1202.5921775022 | 1261.5666527097 |
| 1657.7868364583 | 1399.7409785955 | 1383.7794256577 | 1153.6071467284 | 1424.7622145823 | 1435.7257894853 |
| 1707.7660005687 | 1434.7663903041 | 1410.7083983431 | 1169.7279927595 | 1433.7308944532 | 1454.7500911618 |
| 1836.8596837072 | 1447.7085567647 | 1438.6865452770 | 1179.6079780097 | 1451.6946750289 | 1482.7600525211 |
| 1851.9104921585 | 1463.7058552729 | 1493.7257404290 | 1226.5837665249 | 1475.7415205435 | 1601.7609071748 |
| 1965.0033078157 | 1475.7524532846 | 1657.7746557707 | 1254.5742848689 | 1493.7199998154 | 1617.8131783981 |
| 1993.9576382630 | 1498.8359441884 | 1707.7674595524 | 1267.6624981403 | 1521.7445284991 | 1705.8301714831 |
| 2030.0725452016 | 1513.8350528617 | 1741.7384124480 | 1270.5889280495 | 1657.7820381914 | 1721.8416303755 |
| 2117.0051718341 | 1516.8508367636 | 1759.9419344617 | 1285.6630662003 | 1707.7535067355 | 1751.8397642878 |
| 2211.1040000000 | 1524.6995022584 | 1772.7885938614 | 1295.6745588038 | 1780.8219028458 | 1773.8243844365 |
| 2225.1057143370 | 1540.6977046677 | 1791.7316330678 | 1303.6747068504 | 1833.9003192650 | 1899.9185465607 |
| 2233.0760555801 | 1545.8739541878 | 1794.8145133887 | 1309.6329457602 | 1965.0428126716 | 1917.9348133009 |
| 2249.0551790569 | 1575.8055659440 | 1826.7713546825 | 1311.6777719015 | 2009.9956366957 | 2046.0322902702 |
| 2273.0243820246 | 1603.8018605144 | 1838.9126337394 | 1315.6704433947 | 2121.0292298279 | 2152.0806665127 |
| 2275.0177133976 | 1638.8587442024 | 1851.9207155278 | 1323.6279052020 | 2196.2430234292 | 2196.2511380898 |
| 2283.1725093410 | 1707.7773167585 | 1885.8388336955 | 1331.6688077155 | 2211.1040000000 | 2211.1082343102 |
| 2285.1468331102 | 1724.8491506236 | 1892.8413548063 | 1336.6636016145 | 2225.1035308074 | 2225.1078345592 |
| 2299.1559269316 | 1727.8942622293 | 1897.8828595648 | 1475.7566384231 | 2233.0640714919 | 2233.0753384720 |
| 2305.1334834734 | 1742.8744577082 | 1930.8678832935 | 1490.7732349668 | 2249.0405327668 | 2249.0467603055 |
| 2346.0946395321 | 1780.5473182162 | 1947.8934773575 | 1504.7880325821 | 2255.0540503839 | 2255.0599400675 |
| 2383.9554671806 | 1783.9870693481 | 2096.9577243535 | 1533.8730844331 | 2268.3007063709 | 2261.0791184257 |
| 2501.2271059749 | 1794.8214588864 | 2186.1551405784 | 1552.8661102006 | 2283.1776125871 | 2263.1393760652 |
| 2705.1552989804 | 1819.9383949594 | 2202.1536708649 | 1555.8463464281 | 2285.1319195511 | 2267.3449210917 |
| 2717.0800217414 | 1835.9406576427 | 2211.1066553939 | 1570.9118985088 | 2299.1659019569 | 2276.0728551211 |
| 2727.2728687993 | 1851.9294677119 | 2225.1222409707 | 1587.8242957105 | 2305.1342226900 | 2283.1805133497 |
| 3052.6179184934 | 1883.9871573079 | 2230.1935762901 | 1615.8117070635 | 2383.9608128722 | 2285.1613756606 |
| 3312.3172125984 | 1928.8679259516 | 2233.0822729075 | 1668.8660913425 | 3337.7580000000 | 2294.0722202350 |
| 3337.7580000000 | 1993.9814390448 | 2239.1313168621 | 1688.8521091475 |                 | 2299.1651404516 |
|                 | 2056.9731856870 | 2247.0969853596 | 1695.4642717682 |                 | 2306.1397483043 |
|                 | 2145.1222061025 | 2282.1612828219 | 1704.8463509299 |                 | 2309.0983649604 |
|                 | 2150.0757389060 | 2284.1735773262 | 1707.8115904609 |                 | 2321.1248942466 |
|                 | 2211.1119754813 | 2286.0175912058 | 1716.8295817920 |                 | 2324.1128724951 |
|                 | 2225.1273171550 | 2298.1839245232 | 1734.8362099295 |                 | 2447.2762233926 |
|                 | 2233.0908481728 | 2383.9487322568 | 1750.8400456996 |                 | 3337.7077766260 |
|                 | 2247.0973398941 | 2399.0066086131 | 1762.8300006726 |                 | 3606.6330740210 |
|                 | 2283.1811109176 | 2404.9555855260 | 1777.8602201015 |                 |                 |
|                 | 2331.1988337901 | 2408.0386866840 | 1794.8399832636 |                 |                 |
|                 | 2383.9509019204 | 2477.0198984863 | 1805.9346928073 |                 |                 |
|                 | 2705.1679867232 | 2501.2497709794 | 1824.9552807826 |                 |                 |
|                 | 2717.0652449060 | 2584.2021036633 | 1834.9885111318 |                 |                 |
|                 | 3323.7492483472 | 2705.1521461614 | 1836.8374197819 |                 |                 |
|                 | 3337.7575634134 | 2717.0831942908 | 1852.9599417707 |                 |                 |
|                 |                 | 2807.3084189137 | 1892.8728279915 |                 |                 |
|                 |                 | 2872.3845571467 | 1949.9509924666 |                 |                 |
|                 |                 | 2934.4561206289 | 1993.9979371504 |                 |                 |

|                 |                 |
|-----------------|-----------------|
| 2949.3517659741 | 2126.0865360865 |
| 2966.3447495594 | 2147.4748239619 |
| 2971.3245975480 | 2158.9904287694 |
| 3312.3033541633 | 2168.9635431139 |
| 3324.7278312799 | 2171.2044732007 |
| 3337.7568201737 | 2186.9881001913 |
| 3395.5541761436 | 2202.9907225700 |
| 3409.5842856179 | 2211.1358084397 |
| 3704.4988287449 | 2225.1516924000 |
|                 | 2230.2282043141 |
|                 | 2233.1117963821 |
|                 | 2239.1675681103 |
|                 | 2247.1284552173 |
|                 | 2283.2031383110 |
|                 | 2285.1571058627 |
|                 | 2298.2123913733 |
|                 | 2305.1840301101 |
|                 | 2351.1578690691 |
|                 | 2359.1690423267 |
|                 | 2377.1877038173 |
|                 | 2405.1724752874 |
|                 | 2408.0795934605 |
|                 | 2807.3309378440 |
|                 | 2934.4594968309 |
|                 | 2949.3661573186 |
|                 | 2953.3595501487 |
|                 | 2971.3373197118 |
|                 | 2981.3438186421 |
|                 | 3337.7580000000 |
|                 | 3395.5696687703 |
|                 | 3409.5731367442 |
|                 | 3923.0077851290 |

| SSP 2302        | SSP 2327        | SSP 2621        | SSP 2811        | SSP 3009        | SSP 3221        |
|-----------------|-----------------|-----------------|-----------------|-----------------|-----------------|
| 830.4541121364  | 804.4601021908  | 842.5086572374  | 815.5082852241  | 607.1611800042  | 842.5094000000  |
| 837.4788695844  | 819.3562621547  | 856.5214654494  | 829.5294779493  | 612.2490137864  | 855.0539519224  |
| 842.5111655263  | 830.4496206216  | 861.0690352400  | 842.5104820107  | 617.0960200235  | 856.5172807744  |
| 861.0736985431  | 837.4730573241  | 870.5381747796  | 855.0539658764  | 633.1090185206  | 861.0679899591  |
| 864.4901604633  | 842.5077026112  | 922.4243711448  | 856.5256696590  | 643.9674068464  | 870.5398663162  |
| 870.5402247092  | 853.4831075601  | 980.4561940415  | 861.0647030141  | 649.9880780692  | 957.4735562043  |
| 877.0457957866  | 856.5064020069  | 1008.5024497458 | 864.5027927397  | 656.0009957155  | 1037.5365391752 |
| 954.5399671371  | 858.4580257721  | 1015.6188843587 | 870.5422652525  | 665.9678365117  | 1045.5585359220 |
| 976.5252577820  | 864.4925402321  | 1045.5593272209 | 901.5271572138  | 671.9811455654  | 1059.5164452033 |
| 1001.5965007892 | 870.5368441535  | 1078.5294876981 | 1045.5619059710 | 673.9515883093  | 1078.5018716309 |
| 1014.5187343087 | 872.5331364995  | 1085.6206828432 | 1194.6400617635 | 679.4502318001  | 1106.0577128037 |
| 1016.4690751731 | 952.5197039346  | 1088.5353084445 | 1236.6243010091 | 681.9368161847  | 1106.5562855099 |
| 1023.5800652657 | 972.4828133149  | 1090.5671088722 | 1249.6072673816 | 688.3774628803  | 1142.0904498981 |
| 1036.5087251292 | 979.5626324015  | 1094.5370595298 | 1264.6361068225 | 722.4108799407  | 1142.5914340751 |
| 1045.5609755309 | 1045.5663193227 | 1106.5604827186 | 1348.6523801153 | 766.4549629632  | 1179.5932347260 |
| 1078.5831654996 | 1060.5437415457 | 1110.6017232095 | 1364.6980594058 | 795.2873901683  | 1198.6809375519 |
| 1088.6002381010 | 1073.5358909079 | 1115.5720806999 | 1513.7738876149 | 842.5093983811  | 1356.7016712461 |
| 1106.5813109012 | 1113.4401653862 | 1121.5763951990 | 1527.7416071549 | 855.0566534791  | 1436.7438410306 |
| 1117.6010946674 | 1114.6185361900 | 1153.6034480910 | 1544.8059774140 | 856.5171370497  | 1458.7433188135 |
| 1127.6912601731 | 1137.5521202443 | 1169.7155033516 | 1564.8407126208 | 861.0638781121  | 1475.7467935978 |
| 1143.6915138575 | 1179.5889000400 | 1204.7104593976 | 1782.9276347863 | 864.4819648022  | 1480.7197524783 |
| 1155.5698935198 | 1195.6696356581 | 1216.6381008679 | 1786.9142563751 | 870.5349365719  | 1493.7248483826 |
| 1156.6809184213 | 1251.6949627271 | 1247.6056557558 | 1794.8102553986 | 877.0421044338  | 1707.7669008130 |
| 1168.5037665868 | 1267.6940019999 | 1254.5703652275 | 1892.8386944528 | 893.0094786714  | 1844.9666121341 |
| 1172.6829562649 | 1289.6810334264 | 1263.6015225912 | 1911.0116576655 | 944.5222277677  | 1866.9460876251 |
| 1179.6104633664 | 1299.6929711177 | 1270.5763199128 | 2015.0249465552 | 985.5242455767  | 2196.2478720470 |
| 1195.6735844715 | 1307.6658645980 | 1275.6860625683 | 2176.9277474196 | 1000.5065509908 | 2211.1040000000 |
| 1234.6741342074 | 1329.6355505853 | 1291.6798674448 | 2195.2249097726 | 1045.5655026881 | 2225.1098655280 |
| 1251.7020457826 | 1337.6717081742 | 1295.6648443960 | 2211.1137596333 | 1053.5200820721 | 2233.0778477335 |
| 1256.6522718008 | 1358.7074541993 | 1303.6735820545 | 2225.1197129795 | 1066.0824284290 | 2249.0496630000 |
| 1267.6988964974 | 1384.7322547771 | 1307.6680871908 | 2233.0823753853 | 1067.5591436032 | 2255.0566968776 |
| 1274.6481265896 | 1403.7920902249 | 1309.6099703946 | 2239.1211635020 | 1082.0580015967 | 2271.0270257753 |
| 1289.6715800507 | 1406.6998582665 | 1323.6242684331 | 2247.0781315847 | 1106.0639588824 | 2283.1718091553 |
| 1296.6092079728 | 1413.7426780306 | 1331.6662317019 | 2249.0599841438 | 1106.5669577225 | 2285.1680257971 |
| 1307.6691780801 | 1422.6757423535 | 1403.7077607109 | 2255.9776802358 | 1142.6050626092 | 2299.1616859668 |
| 1312.6117287287 | 1475.7454409175 | 1410.7758911835 | 2263.0556384189 | 1178.6472944963 | 2305.1526395295 |
| 1329.6174631837 | 1479.7785316833 | 1428.7180281235 | 2271.0427480100 | 1210.6426109032 | 2321.1306588336 |
| 1340.6076043427 | 1576.4507368817 | 1495.7910209253 | 2283.1711524517 | 1216.5878934169 | 2573.1170614453 |
| 1362.5897943825 | 1621.7592806211 | 1533.8609342422 | 2285.1533994878 | 1259.6428929375 | 2992.3966017851 |
| 1384.7427696525 | 1624.8358562965 | 1570.8998966546 | 2292.0535755702 | 1273.6588424796 | 3120.4953290695 |
| 1406.7042150281 | 1633.8693292358 | 1587.8043478800 | 2299.1695991176 | 1316.6630156433 | 3337.7580000000 |
| 1422.6787002708 | 1638.8568873831 | 1615.7949506455 | 2305.1333996146 | 1355.6727973647 |                 |
| 1432.7217764457 | 1660.7929672754 | 1641.8702742332 | 2408.0527080364 | 1390.7657612987 |                 |
| 1448.7473255200 | 1707.7628882310 | 1668.8497679936 | 2432.0937845627 | 1415.7004377559 |                 |
| 1475.7440795209 | 1752.9257588139 | 1688.8330120856 | 2807.3039258817 | 1475.7509737367 |                 |
| 1495.7792499724 | 1759.9344107405 | 1701.9114159517 | 2934.4571808048 | 1493.7431838253 |                 |
| 1511.7387137919 | 1771.9255022796 | 1718.8881480475 | 2949.3503449304 | 1546.8695302906 |                 |
| 1553.8365657270 | 1781.9123576700 | 1734.8210160431 | 2971.3143485557 | 1657.8004891903 |                 |
| 1613.9050351069 | 1794.8114428766 | 1756.9703460686 | 2981.3383584387 | 1707.7783645642 |                 |
| 1635.8838947893 | 1851.9127746441 | 1779.7826649315 | 3297.8827770985 | 1756.9017680782 |                 |
| 1639.8624899820 | 1867.4117983954 | 1803.9654946352 | 3323.7508003240 | 1826.8438178674 |                 |
| 1651.8520901086 | 1871.9689196632 | 1824.9584123248 | 3337.7497042038 | 2041.9996379191 |                 |
| 1657.8143057935 | 1882.8222900979 | 1834.9176176809 | 3340.8008676266 | 2194.2905667880 |                 |
| 1686.8908048863 | 1890.9327916964 | 1856.9334685600 | 3348.6129097283 | 2196.2558724266 |                 |
| 1704.8983669569 | 1916.0249789910 | 1864.9131867545 | 3353.7235722672 | 2211.1039657287 |                 |
| 1726.8807729369 | 1951.9566349543 | 1891.8646033236 | 3395.5870911901 | 2225.0873215523 |                 |
| 1755.8612332438 | 1980.0877168834 | 2057.9495512643 | 3409.6002530958 | 2233.0792107678 |                 |
| 1759.9375048708 | 2002.0565955727 | 2186.9834962239 |                 | 2249.0494483467 |                 |
| 1766.8173120761 | 2138.1414478533 | 2202.9747859086 |                 | 2255.0611492036 |                 |
| 1771.8505066864 | 2146.6291190369 | 2211.1073827065 |                 | 2265.1173063648 |                 |
| 1781.8631584736 | 2170.0454037097 | 2233.0862017769 |                 | 2269.4170938934 |                 |
| 1799.8927263396 | 2186.1516396746 | 2249.0619658739 |                 | 2271.0234879310 |                 |
| 1802.8548192593 | 2199.0983762805 | 2283.1782115565 |                 | 2283.1732856159 |                 |
| 1815.8847826608 | 2202.1622389860 | 2285.1674678584 |                 | 2285.1508043088 |                 |

|                 |                 |                 |                 |
|-----------------|-----------------|-----------------|-----------------|
| 1821.8718177549 | 2211.1023407312 | 2299.1718508337 | 2299.1604695821 |
| 1827.8845750250 | 2225.1196063581 | 2305.1567831197 | 2305.1458940704 |
| 1850.9591652886 | 2233.0892340787 | 2409.2097762206 | 2321.1203432588 |
| 1861.8159935849 | 2235.2195711389 | 2575.3244176260 | 2383.9523093529 |
| 1867.4313907122 | 2247.1248214846 |                 |                 |
| 1951.9657406989 | 2249.0419378787 |                 |                 |
| 2063.0610779495 | 2276.5547993070 |                 |                 |
| 2096.9861364994 | 2282.8771139309 |                 |                 |
| 2146.6371061283 | 2283.1691822721 |                 |                 |
| 2158.8989738197 | 2316.1268182902 |                 |                 |
| 2186.1584320168 | 2332.1333099146 |                 |                 |
| 2202.1659148425 | 2378.1092304268 |                 |                 |
| 2211.1057258974 | 2383.9360855450 |                 |                 |
| 2225.1012985582 | 2431.1701123627 |                 |                 |
| 2233.1157890630 | 2450.2057583654 |                 |                 |
| 2235.1971790357 | 2509.1809620866 |                 |                 |
| 2247.0762106652 | 2527.1978543021 |                 |                 |
| 2249.0369534197 | 2550.2716102421 |                 |                 |
| 2273.0218156730 | 2559.3368075784 |                 |                 |
| 2284.1660923812 | 2568.2989671208 |                 |                 |
| 2287.0235400061 | 2616.4795786872 |                 |                 |
| 2292.1109345670 | 2705.1924147862 |                 |                 |
| 2332.1333813778 | 2707.3729345658 |                 |                 |
| 2383.9337872466 | 2721.3005749201 |                 |                 |
| 2420.2062562108 | 2723.3529782216 |                 |                 |
| 2705.1486284769 | 2949.3485338149 |                 |                 |
| 2871.2249756817 | 2971.3133057891 |                 |                 |
| 2873.4280062622 | 3323.7434787423 |                 |                 |
| 2888.2434199925 | 3337.7587372378 |                 |                 |
| 2910.2053528186 |                 |                 |                 |
| 3228.4530669739 |                 |                 |                 |
| 3337.7572331526 |                 |                 |                 |

| SSP 3602        | SSP 4621        | SSP 5217        | SSP 5304        | SSP 5322        | SSP 5703        |
|-----------------|-----------------|-----------------|-----------------|-----------------|-----------------|
| 842.5094000000  | 830.4512682665  | 830.4453011484  | 830.4484721550  | 842.5099340917  | 830.4485543857  |
| 855.0596926410  | 842.5094000000  | 842.5094000000  | 842.5111069985  | 861.0702935444  | 842.5094000000  |
| 856.5218665523  | 855.0566685582  | 855.0564479645  | 855.0492197714  | 870.5356249798  | 855.4753726478  |
| 861.0712141473  | 856.5233788896  | 856.5022474175  | 856.5215371610  | 877.0467432523  | 861.0675957123  |
| 870.5399758602  | 861.0703807866  | 861.0697305430  | 861.0692115269  | 893.0107602138  | 870.5394973215  |
| 877.0433413585  | 870.5391265445  | 864.4892621912  | 870.5411462966  | 1045.5628144585 | 998.4046723202  |
| 980.4582785151  | 877.0426605379  | 870.5372077714  | 877.0469690668  | 1197.6933387447 | 1045.5605876517 |
| 1045.5626338983 | 915.4565640612  | 877.0449639281  | 1045.5648029392 | 1217.6856810540 | 1053.6314868667 |
| 1076.5341034137 | 1024.5405483035 | 885.5040383361  | 1060.5471565282 | 1221.6274369834 | 1098.4479278230 |
| 1085.6070065099 | 1032.5368235940 | 904.4132825967  | 1106.0637970337 | 1266.6340936425 | 1106.0577839374 |
| 1093.5203242564 | 1045.5565221693 | 926.4934189666  | 1106.5631529539 | 1313.7202424176 | 1106.5380945834 |
| 1179.5894570072 | 1069.5608394207 | 927.4968186854  | 1111.5511839151 | 1335.6964333158 | 1153.5363615744 |
| 1238.6168547865 | 1086.5776337831 | 994.5633046634  | 1142.5985997672 | 1351.7261879677 | 1176.6660480515 |
| 1254.5634065314 | 1101.5472737612 | 1013.6010573050 | 1179.5969769070 | 1397.7544427448 | 1194.6922052261 |
| 1272.6991564003 | 1106.0595932094 | 1041.5945889311 | 1185.6730532618 | 1428.8402027197 | 1210.6820063922 |
| 1295.6517641532 | 1106.5601954669 | 1045.5578951685 | 1197.6927750977 | 1660.8614646930 | 1216.6633954799 |
| 1303.6552594712 | 1120.5677260442 | 1055.5799084028 | 1217.5569107427 | 1707.7961505109 | 1226.6723707925 |
| 1309.6107220867 | 1142.6047985872 | 1067.5479424636 | 1251.6907872836 | 1824.9524448617 | 1232.6431754509 |
| 1323.6061729480 | 1167.5981824164 | 1078.5456178746 | 1256.6655715177 | 1896.0103348246 | 1251.6827752176 |
| 1410.7521683926 | 1170.6377352850 | 1093.5964144214 | 1267.6962583989 | 1950.0531138813 | 1253.6183136333 |
| 1428.7006508557 | 1185.6608712214 | 1106.0572910441 | 1307.6633261572 | 2031.9787860122 | 1259.5813635704 |
| 1457.8504292678 | 1195.6628795405 | 1106.5596533059 | 1348.6458515104 | 2180.1045464543 | 1267.6877146035 |
| 1475.7419655659 | 1198.6868386812 | 1142.5951612917 | 1384.7026290072 | 2202.0807959500 | 1320.5857432811 |
| 1487.8618497963 | 1250.6243517011 | 1195.6641818406 | 1434.7561485642 | 2211.1088171568 | 1340.7770515852 |
| 1495.7763179682 | 1252.6853580608 | 1251.6883865503 | 1475.7464001154 | 2218.0572312694 | 1348.6447674621 |
| 1506.8013793093 | 1254.6989716116 | 1267.6951275323 | 1493.7317804106 | 2225.1248578945 | 1384.7182226797 |
| 1533.8342378772 | 1267.6920740000 | 1348.6422210623 | 1542.8253496985 | 2233.0850292045 | 1475.7311451041 |
| 1570.8852384386 | 1281.6366369341 | 1384.7137631822 | 1570.9121599797 | 2249.0574459606 | 1493.7226073353 |
| 1587.7830417352 | 1326.7381056450 | 1601.7758322278 | 1638.8497540791 | 2273.0194526501 | 1518.9190415432 |
| 1668.8372895068 | 1348.6473598662 | 1668.8586941475 | 1657.7840627222 | 2283.1757343208 | 1520.7663951233 |
| 1688.8259527002 | 1384.7089455336 | 1759.9262275246 | 1707.7682689282 | 2752.4540788459 | 1536.7816354741 |
| 1701.8987594135 | 1388.6753876392 | 1794.8060120616 | 1722.7897180447 | 2787.4065266172 | 1549.6418828514 |
| 1718.8710516447 | 1406.6958027074 | 1825.9439804021 | 1851.9172748363 | 3323.6696840749 | 1554.8393394825 |
| 1756.9510354534 | 1528.7052534879 | 2196.2507825171 | 2029.0048906922 | 3337.6915763830 | 1671.8545393473 |
| 1794.7925918094 | 1561.8396956083 | 2202.1491855725 | 2089.0109355995 |                 | 1707.7588288454 |
| 1805.8941204791 | 1587.7785592586 | 2211.1040000000 | 2196.2508264948 |                 | 1710.9426349238 |
| 1810.8274224197 | 1649.8825396231 | 2225.1066718325 | 2202.1514411557 |                 | 1735.7942499468 |
| 1824.9402960772 | 1673.8500087158 | 2234.1036199160 | 2211.1123802774 |                 | 1759.9284631018 |
| 1836.7913761923 | 1689.9164551079 | 2236.1096985372 | 2225.1116493142 |                 | 1780.7893844922 |
| 1864.8814377245 | 1694.8897353427 | 2249.0553782557 | 2233.0876428162 |                 | 1794.8048047725 |
| 1933.9473784085 | 1699.8472571449 | 2255.0635535073 | 2244.6061740033 |                 | 1817.9399015344 |
| 1940.9301476364 | 1707.7708012398 | 2271.0357868523 | 2245.0724791147 |                 | 1917.0254896428 |
| 2186.9565601739 | 1759.9259170664 | 2283.1768683163 | 2249.0575657239 |                 | 1951.9708839742 |
| 2196.2479419813 | 1790.8755875239 | 2285.1532040262 | 2255.0654112367 |                 | 1966.1193359642 |
| 2211.1040000000 | 1794.8030203138 | 2299.1617655262 | 2271.0507164084 |                 | 2068.9612771227 |
| 2225.1086405365 | 1951.9456339493 | 2301.1433995165 | 2283.1844564082 |                 | 2196.2374445514 |
| 2233.0715843724 | 2088.0764392308 | 2305.1519649785 | 2285.1645982724 |                 | 2202.1459511949 |
| 2249.0471024741 | 2196.2392929695 | 2321.1312439214 | 2299.1686031644 |                 | 2211.1040000000 |
| 2255.0555847005 | 2211.1040000000 | 2434.2604143422 | 2305.1538369682 |                 | 2225.0966288263 |
| 2268.2913802693 | 2225.1002174941 | 3337.7580000000 | 2314.1522020310 |                 | 2233.0758141300 |
| 2283.1775607487 | 2233.0794739203 |                 | 2321.1289022853 |                 | 2249.0528484041 |
| 2285.1556959931 | 2244.6266993813 |                 | 2383.9563183468 |                 | 2255.0543467271 |
| 2299.1626889576 | 2245.1338815657 |                 | 2453.2183549344 |                 | 2283.1738504214 |
| 2305.1433769684 | 2249.0522085467 |                 | 2705.1703007576 |                 | 2285.1542094713 |
| 2321.1260266164 | 2255.0577052585 |                 | 3290.6962880320 |                 | 2299.1556444004 |
| 2409.1976406136 | 2271.0409688663 |                 | 3337.7827844057 |                 | 2305.1434946799 |
| 3309.7277950697 | 2283.1725586904 |                 |                 |                 | 3337.7580000000 |
| 3337.7580000000 | 2285.1558883613 |                 |                 |                 |                 |
|                 | 2300.1573081844 |                 |                 |                 |                 |
|                 | 2305.1428667818 |                 |                 |                 |                 |
|                 | 2321.1245313811 |                 |                 |                 |                 |
|                 | 2328.1629889602 |                 |                 |                 |                 |
|                 | 2369.1515273790 |                 |                 |                 |                 |
|                 | 2518.0098923947 |                 |                 |                 |                 |

2707.2078791022  
3337.7580000000

| SSP 6304        | SSP 7451        | SSP 7537        | SSP 7815        | SSP 8101        | SSP 8507        |
|-----------------|-----------------|-----------------|-----------------|-----------------|-----------------|
| 842.5081171912  | 842.5019498876  | 842.5237334766  | 842.5195814576  | 842.5094000000  | 825.0904844788  |
| 870.5394273555  | 855.0392401389  | 855.0645346228  | 849.4810946798  | 870.5385802772  | 842.5056193699  |
| 877.0443386471  | 856.5135048196  | 856.5263004840  | 855.0597594570  | 874.4927623452  | 855.0506955084  |
| 893.0181201070  | 861.0573876980  | 859.4750051674  | 856.5294420003  | 928.5259594411  | 856.5154984423  |
| 995.5278933735  | 870.5299196830  | 861.0710603566  | 861.0776776718  | 1045.5630491851 | 861.0638433702  |
| 1045.5579982903 | 877.0302380253  | 870.5514664184  | 870.5482012844  | 1126.6077426660 | 870.5366832678  |
| 1106.0570880906 | 1002.5057463803 | 877.0454759034  | 877.0441109033  | 1139.5703728142 | 877.0400341204  |
| 1106.5606525685 | 1045.5448094428 | 1045.5671935037 | 1023.5169989694 | 1229.6724593639 | 893.4454902768  |
| 1118.4899280378 | 1066.0529297304 | 1066.0714754373 | 1028.5655453624 | 1234.6754833676 | 938.4883451197  |
| 1142.5969140547 | 1088.5247114574 | 1106.0676541126 | 1045.5640488067 | 1258.6912710636 | 960.5491686977  |
| 1371.6477785087 | 1106.0508834858 | 1106.5784360587 | 1089.5453636709 | 1267.6918402192 | 974.4997835784  |
| 1475.7364866068 | 1142.5794169114 | 1142.6108098861 | 1106.0606581351 | 1277.7022524341 | 1029.4426897869 |
| 1566.7607603966 | 1413.7498457790 | 1153.5471492359 | 1106.5672334944 | 1321.7646611120 | 1045.5560356825 |
| 1661.7983554824 | 1549.7755268253 | 1278.6659830435 | 1126.5657413449 | 1357.7150407935 | 1106.0570350516 |
| 1692.8543446397 | 1794.7825526745 | 1295.6500325109 | 1142.5960910699 | 1434.7581801675 | 1106.5624268543 |
| 1707.7526358148 | 1848.7960186511 | 1412.7422557099 | 1165.5480433184 | 1479.7905352081 | 1116.6355067206 |
| 2195.2285781009 | 2196.2167863887 | 1568.8406871158 | 1182.6022390932 | 1566.8398803157 | 1125.5858354353 |
| 2211.0891047970 | 2211.0764029793 | 1739.9099871551 | 1331.6679608076 | 1636.4493979509 | 1142.5966068684 |
| 2225.0889152253 | 2225.0715355113 | 1766.7933990127 | 1363.6126581410 | 1638.8467664904 | 1177.5810367786 |
| 2233.0561678190 | 2233.0390884338 | 1794.7998876879 | 1430.7637287891 | 1657.8605780175 | 1179.6346898966 |
| 2249.0351560207 | 2244.5744354609 | 1972.8472989785 | 1491.7308341864 | 1675.7970386573 | 1312.6956297084 |
| 2255.0455438861 | 2248.9978037227 | 2194.3135106955 | 1566.7312735534 | 1691.7974575050 | 1365.6908368127 |
| 2265.0483995185 | 2255.0234143502 | 2196.2352388273 | 1587.7714516513 | 1707.7814953917 | 1401.6846502292 |
| 2268.3419909139 | 2268.2606077832 | 2211.1007712723 | 1605.7887003265 | 1794.8125657656 | 1403.7123426577 |
| 2273.0045743963 | 2283.1485373592 | 2225.0984540868 | 1629.7845963918 | 1826.7791178056 | 1418.7012980657 |
| 2274.9975257152 | 2285.1200205674 | 2233.0623555574 | 1752.8376740285 | 1847.8946928177 | 1467.8342814189 |
| 2283.1596800068 | 2300.1332905528 | 2244.6038156095 | 1794.8002722615 | 1921.0043382818 | 1493.7331140536 |
| 2299.1434753956 | 2305.1108828137 | 2249.0315027055 | 1826.7796377235 | 1993.9681553571 | 1639.9174135228 |
| 2305.1351579764 | 2321.0927677991 | 2255.0422467198 | 2196.2394471006 | 2007.0221576228 | 1690.8322303334 |
| 2321.1175847659 | 2460.2084987193 | 2265.1188508167 | 2211.0967980876 | 2008.0509640828 | 1712.8526020561 |
| 2335.9261359911 | 3337.7296580043 | 2268.2762951757 | 2225.0967060079 | 2027.0758582096 | 1727.8021579159 |
| 2346.0750172249 |                 | 2283.1741473411 | 2233.0589721893 | 2150.0672856932 | 1777.9981756445 |
| 2407.9913462298 |                 | 2285.1387757151 | 2249.0394772425 | 2163.1354737584 | 1804.9344100937 |
| 3337.7278183542 |                 | 2300.1609009958 | 2255.0457375394 | 2184.1210931709 | 1841.8907678805 |
|                 |                 | 2305.1340243094 | 2284.1650036244 | 2196.1934566876 | 1902.8183182940 |
|                 |                 | 2321.1066398616 | 2300.1469209892 | 2202.1494571527 | 1906.9927735736 |
|                 |                 | 2704.2746283177 | 2305.1278854150 | 2211.1040000000 | 1910.9231628879 |
|                 |                 | 3337.7433575387 | 2321.1132813443 | 2225.1130072367 | 2141.0971264996 |
|                 |                 |                 | 2365.1404048003 | 2233.0811595278 | 2151.0674517427 |
|                 |                 |                 |                 | 2267.2157032474 | 2196.2549989113 |
|                 |                 |                 |                 | 2273.0149097028 | 2200.0501439486 |
|                 |                 |                 |                 | 2283.1770193033 | 2211.1200806197 |
|                 |                 |                 |                 | 2305.1547903381 | 2225.1124798260 |
|                 |                 |                 |                 | 2365.2488523749 | 2233.0924448263 |
|                 |                 |                 |                 | 2381.2457035810 | 2244.6287307367 |
|                 |                 |                 |                 | 2412.2598828377 | 2249.0646235216 |
|                 |                 |                 |                 | 2501.2436129261 | 2255.0734327952 |
|                 |                 |                 |                 | 2584.2900003624 | 2261.2179250532 |
|                 |                 |                 |                 | 2646.4039319478 | 2265.1201808137 |
|                 |                 |                 |                 | 2668.3744838059 | 2268.3233335332 |
|                 |                 |                 |                 | 2779.9275707626 | 2272.0708682003 |
|                 |                 |                 |                 | 2780.4478219821 | 2283.1937728841 |
|                 |                 |                 |                 | 2872.3852000589 | 2285.1714972936 |
|                 |                 |                 |                 | 3052.6167283627 | 2299.1823715588 |
|                 |                 |                 |                 | 3290.6718187218 | 2305.1639215727 |
|                 |                 |                 |                 | 3323.7438571791 | 2321.1372590350 |
|                 |                 |                 |                 | 3337.7580000000 | 3290.6961250071 |
|                 |                 |                 |                 | 3369.4970115519 | 3308.7169764667 |
|                 |                 |                 |                 | 3440.5343886590 | 3323.7615848931 |
|                 |                 |                 |                 |                 | 3337.7675075582 |





| SSP 8514        | SSP 8609        | SSP 8620        | SSP 9301        | SSP 615         | SSP 1114        |
|-----------------|-----------------|-----------------|-----------------|-----------------|-----------------|
| 842.5063013274  | 842.5052594862  | 842.5148809074  | 800.3364641401  | 839.0912338202  | 842.5094000000  |
| 855.0496763276  | 856.5158942375  | 856.5256213006  | 842.5094000000  | 842.5094000000  | 856.5175604716  |
| 856.5159014242  | 870.5359304093  | 870.5431854398  | 848.4759097852  | 855.0561149730  | 870.5392105761  |
| 861.0655253663  | 877.0428809126  | 877.0460383984  | 855.0581364780  | 861.0691058667  | 877.0353177285  |
| 870.5373909765  | 1045.5568053469 | 877.4939728082  | 856.5233448139  | 973.5228212670  | 954.5383541070  |
| 877.0391247602  | 1077.5914423915 | 995.5592139189  | 861.0698306254  | 995.5163158093  | 1001.5866141940 |
| 893.0131013655  | 1106.5667255101 | 1045.5730827634 | 870.5406688384  | 1003.5457425514 | 1014.5113589121 |
| 1045.5583790255 | 1130.5444179570 | 1106.0675654903 | 877.0472839575  | 1037.5181766948 | 1045.5607123212 |
| 1092.5701670131 | 1142.5905228089 | 1106.5759452689 | 890.3800348795  | 1045.5591807776 | 1083.5424977022 |
| 1106.5633894262 | 1287.6420979921 | 1172.5488334585 | 901.5082718107  | 1064.5916141408 | 1106.5661105330 |
| 1143.6194671855 | 1291.7129593395 | 1188.5528023709 | 1045.5645553494 | 1066.0759227131 | 1127.6810217485 |
| 1163.6335996079 | 1301.7348480731 | 1191.6009762736 | 1059.5273504900 | 1074.4922379739 | 1142.5902993627 |
| 1179.5931115578 | 1330.6520414077 | 1236.5317381851 | 1061.5859606417 | 1082.5882222621 | 1156.6888225232 |
| 1185.6633269066 | 1517.8823617598 | 1341.6857095617 | 1106.5684201602 | 1090.5193959728 | 1179.5900621746 |
| 1203.5673914700 | 1530.6936624714 | 1359.6767043822 | 1126.5649153514 | 1106.0592251409 | 1307.6901466679 |
| 1210.6682930618 | 1554.8174372974 | 1370.6953895761 | 1179.5988819934 | 1107.5386274142 | 1340.6071842100 |
| 1307.6609097857 | 1582.9025134329 | 1515.7591404663 | 1215.6294771717 | 1109.4893030791 | 1383.6745406498 |
| 1336.6952772107 | 1614.8275860799 | 1543.7491778007 | 1250.6242026066 | 1142.0988766444 | 1434.7622493384 |
| 1352.6959639669 | 1794.8165073983 | 1619.7845622085 | 1266.6217095452 | 1142.5975531207 | 1475.7525934843 |
| 1359.6709201938 | 1798.8342340671 | 1652.7766542246 | 1374.6792349958 | 1165.5757580192 | 1493.7337325397 |
| 1475.7432689509 | 2097.0964129624 | 1664.7633773562 | 1377.6293475359 | 1179.5932647136 | 1615.8277458213 |
| 1493.7283334479 | 2195.2247379354 | 1685.2559701703 | 1391.7017290717 | 1193.6089372626 | 1657.7805792265 |
| 1508.7922951724 | 2197.2270582096 | 1720.7707131643 | 1530.7863224692 | 1201.5917191252 | 1704.8920521209 |
| 1513.7493983561 | 2211.0946365578 | 1721.2683210381 | 1584.8426160643 | 1234.6710278181 | 1707.7639834251 |
| 1603.8068667897 | 2225.0890599538 | 1886.9852503733 | 1682.8539564593 | 1277.6953318351 | 2211.1040000000 |
| 1629.8200803542 | 2233.0679228867 | 2196.2552802731 | 1763.8105755912 | 1300.5382204403 | 2233.0745678623 |
| 1659.8204279517 | 2244.5869770956 | 2211.1113146473 | 1804.9581065705 | 1302.7045527295 | 2273.0210327592 |
| 1707.7699033260 | 2249.0378733193 | 2225.1038525084 | 2172.0392364787 | 1320.5761626559 | 2284.1718763550 |
| 1750.8392783254 | 2255.0531441906 | 2233.0759897114 | 2189.0404682339 | 1329.7163277400 | 2300.1598979177 |
| 1759.9462384261 | 2265.1322070877 | 2244.6050250690 | 2211.1040000000 | 1343.7271381147 | 2305.1420069649 |
| 1881.9790936996 | 2283.1645683557 | 2249.0534150569 | 2233.0792700518 | 1357.7031076005 | 2346.0874420905 |
| 1920.9748967217 | 2285.1448642349 | 2255.0628256613 | 2249.0547614218 | 1365.6296159134 | 2383.9533379938 |
| 1996.9609315998 | 2288.1405596209 | 2271.0320208150 | 2283.1729446727 | 1383.6844178941 | 3337.7580000000 |
| 2196.2382414318 | 2300.1542195905 | 2283.1775504065 | 2285.1713197853 | 1393.7376524380 |                 |
| 2211.0984318196 | 2305.1308070247 | 2285.1600724675 | 2300.1634577228 | 1405.6640203922 |                 |
| 2225.0889380060 | 2321.1129333836 | 2299.1638987413 | 2305.1479038892 | 1434.7606815421 |                 |
| 2233.0702793897 | 2347.1655989653 | 2305.1457873030 | 3337.7580000000 | 1458.7142965901 |                 |
| 2249.0418221414 | 2363.1577941578 | 2321.1201936360 |                 | 1460.7903991179 |                 |
| 2255.0522581394 | 3290.6243812416 | 3338.7146801775 |                 | 1475.7528781029 |                 |
| 2271.0271308917 | 3309.6592577800 | 3369.4636154213 |                 | 1493.7249788757 |                 |
| 2283.1637143823 | 3337.6827474861 | 3371.4494901948 |                 | 1497.7496163631 |                 |
| 2285.1375157893 |                 | 3440.4974410714 |                 | 1612.8350602080 |                 |
| 2300.1415076147 |                 |                 |                 | 1638.8517422361 |                 |
| 2305.1331157763 |                 |                 |                 | 1707.7615724934 |                 |
| 2321.1085056627 |                 |                 |                 | 1797.0051199789 |                 |
| 2328.1346509205 |                 |                 |                 | 1838.9063102209 |                 |
| 2383.9366969279 |                 |                 |                 | 1890.9609880925 |                 |
| 2432.2011292604 |                 |                 |                 | 1908.8022997946 |                 |
| 2935.4158302151 |                 |                 |                 | 1964.9648646607 |                 |
| 2952.4255203483 |                 |                 |                 | 1993.9759133723 |                 |
|                 |                 |                 |                 | 2015.9574335068 |                 |
|                 |                 |                 |                 | 2025.9454127009 |                 |
|                 |                 |                 |                 | 2096.0397009241 |                 |
|                 |                 |                 |                 | 2150.0706273579 |                 |
|                 |                 |                 |                 | 2196.2309679633 |                 |
|                 |                 |                 |                 | 2211.1040000000 |                 |
|                 |                 |                 |                 | 2224.1283927942 |                 |
|                 |                 |                 |                 | 2233.0767110876 |                 |
|                 |                 |                 |                 | 2256.0374047130 |                 |
|                 |                 |                 |                 | 2283.1791086207 |                 |
|                 |                 |                 |                 | 2285.1660790529 |                 |
|                 |                 |                 |                 | 2286.9654537859 |                 |
|                 |                 |                 |                 | 2299.1597793601 |                 |
|                 |                 |                 |                 | 2305.1530324169 |                 |

2367.2537518979  
2383.9601402502  
2399.0149276681  
2566.2686363552  
2671.2626610741  
2705.1627616497  
2832.7830958729  
2857.4879231031  
2872.4037689935  
2888.4114502030  
2894.3804832125  
3048.5070307822  
3052.6356509152  
3097.4172612288  
3337.7580000000  
3731.6525256461

| SSP 1210        | SSP 1212        | SSP 1222        | SSP 1313        | SSP 1320        | SSP 1342        |
|-----------------|-----------------|-----------------|-----------------|-----------------|-----------------|
| 817.8403133509  | 842.5094000000  | 842.5094000000  | 842.4964881003  | 842.5102921931  | 842.5094000000  |
| 842.5094000000  | 870.5369638699  | 856.5214829433  | 856.5143581486  | 856.5266593005  | 855.0539552062  |
| 870.5351032695  | 877.0495367593  | 870.5382190545  | 870.5257782247  | 870.5438952511  | 856.5205196474  |
| 887.0106542289  | 1045.5624758116 | 904.4378728895  | 945.5297505820  | 945.5531410436  | 861.0598175300  |
| 1045.5619820027 | 1106.0637109665 | 1045.5567021492 | 976.4351690408  | 973.4909436490  | 870.5351258094  |
| 1057.4954983946 | 1142.5974235578 | 1106.0620793000 | 1045.5462080065 | 976.4509126223  | 877.0264285319  |
| 1179.5949473337 | 1183.6449142366 | 1106.5557476182 | 1106.0464947669 | 1045.5623262178 | 918.4991273165  |
| 1251.6907588430 | 1197.6820200147 | 1142.5911822487 | 1106.5483601435 | 1132.5283890820 | 1045.5622604261 |
| 1267.6963154838 | 1198.7184371847 | 1183.6371348726 | 1132.5050095757 | 1162.3497178229 | 1066.0543133026 |
| 1320.5833773225 | 1403.7929920720 | 1197.6627429064 | 1142.0864395332 | 1183.8905255658 | 1126.5551603184 |
| 1323.6699608311 | 1418.7218558755 | 1287.6040270832 | 1142.5671045450 | 1198.7057737301 | 1197.6550713052 |
| 1384.7081888052 | 1435.7496885310 | 1419.7249781423 | 1156.4938944274 | 1226.6497007979 | 1242.6285021155 |
| 1475.7467933393 | 1439.7776811474 | 1435.7424983900 | 1171.6232190737 | 1515.7472188713 | 1308.6128190764 |
| 1493.7224473691 | 1442.7907787171 | 1475.7394426308 | 1183.8933095896 | 1531.7393820195 | 1385.7082909401 |
| 1638.8522811114 | 1475.7511686040 | 1601.8010780576 | 1198.6893817453 | 1547.7342562158 | 1418.7043315235 |
| 1657.7914596056 | 1502.7366272251 | 1638.8454239155 | 1214.6693707439 | 1638.8333172107 | 1442.7734432698 |
| 1700.7834858971 | 1601.8034680639 | 1657.7880597221 | 1220.6592570048 | 1766.7704612174 | 1469.7384785757 |
| 1707.7682973001 | 1638.8488826787 | 1707.7657972324 | 1226.6226693747 | 1790.8892410877 | 1751.7617060202 |
| 1801.8873652038 | 1657.7967643143 | 1801.8852020428 | 1260.5996579629 | 1794.8080264170 | 1775.8411058954 |
| 1812.5834389796 | 1707.7624693281 | 1934.0023701206 | 1515.7180180353 | 1954.0605486024 | 1794.8034172107 |
| 1813.8821564518 | 1790.8810108443 | 2196.2547383154 | 1591.7796468144 | 1960.9025887151 | 1940.9145324921 |
| 1837.9290874771 | 1954.0434333520 | 2211.1040000000 | 1638.8149451086 | 1976.0326256023 | 2196.2184591912 |
| 1851.9073908802 | 1988.0271759377 | 2225.1057183257 | 1707.7526044881 | 2196.2518543750 | 2211.1040000000 |
| 1867.9219808270 | 2195.2515044493 | 2233.0760878753 | 1790.8637101144 | 2211.1046620945 | 2225.0914737983 |
| 1883.9077368154 | 2197.2288752625 | 2249.0498925195 | 1821.7719838702 | 2225.1148102137 | 2233.0583728527 |
| 1934.0017286578 | 2211.1040000000 | 2265.0891613014 | 1954.0440007972 | 2230.2027607585 | 2239.1225710445 |
| 1993.9565755909 | 2225.0934197790 | 2273.0226686948 | 1976.0123322540 | 2233.0740157415 | 2244.5846214881 |
| 2150.0692693100 | 2233.0751552494 | 2275.0109400847 | 1991.9861961115 | 2239.1332170916 | 2249.0303972304 |
| 2186.1436618049 | 2249.0444557249 | 2283.1741522027 | 2196.2353516513 | 2249.0463943703 | 2255.0452504343 |
| 2211.1040000000 | 2255.0489589242 | 2285.1495745922 | 2211.0900452047 | 2268.2960557509 | 2268.2511240838 |
| 2233.0710853657 | 2265.0627634620 | 2299.1550529409 | 2225.0905304097 | 2283.1812184036 | 2271.0726350144 |
| 2273.0214871322 | 2273.0210509718 | 2305.1474571957 | 2233.0543389995 | 2294.2086049311 | 2283.1776970510 |
| 2275.0140542859 | 2275.0126892603 | 2321.1373237095 | 2249.0317733502 | 2299.1749036905 | 2285.1270569147 |
| 2284.1712715681 | 2283.1717087829 | 2335.9477268056 | 2255.0413937429 | 2305.1565435983 | 2299.1616386314 |
| 2299.1561514247 | 2285.1520795255 | 2337.9303912985 | 2265.0733182326 | 2321.1131382681 | 2305.1300992995 |
| 2305.1449342807 | 2299.1580879853 | 2346.0930829044 | 2268.3003986870 | 2323.2336528132 | 2307.0961683086 |
| 2335.9502914843 | 2305.1430342541 | 2398.8757351870 | 2271.0113153490 | 2550.1651880432 | 2317.9962749216 |
| 2346.0965496835 | 2321.1250995387 | 2408.0093186932 | 2273.0123404107 | 2730.3061322379 | 2321.1021797173 |
| 2383.9474772260 | 2335.9543029840 | 2786.3537803454 | 2283.1597465874 | 3094.6085533209 | 3337.7580000000 |
| 2398.9613992109 | 2346.0906500683 | 3337.7580000000 | 2285.1390038251 | 3139.5723511066 |                 |
| 2501.2416491241 | 2721.2923827636 |                 | 2294.1845285908 | 3183.6206083775 |                 |
| 2705.1557268184 | 3337.7580000000 |                 | 2299.1479957780 | 3337.7576011448 |                 |
| 2717.0762634190 | 3338.7119412281 |                 | 2301.1532482040 |                 |                 |
| 2932.5053483308 |                 |                 | 2305.1294983514 |                 |                 |
| 3223.2917207993 |                 |                 | 2323.2014830963 |                 |                 |
| 3312.3105652502 |                 |                 | 2778.1744585689 |                 |                 |
| 3337.7580000000 |                 |                 | 3139.5587517926 |                 |                 |
|                 |                 |                 | 3183.5958107291 |                 |                 |
|                 |                 |                 | 3199.5955705396 |                 |                 |
|                 |                 |                 | 3290.6495236974 |                 |                 |
|                 |                 |                 | 3337.7265906680 |                 |                 |



| SSP 2003        | SSP 2006        | SSP 2007        | SSP 2111        | SSP 2120        | SSP 2509        |
|-----------------|-----------------|-----------------|-----------------|-----------------|-----------------|
| 842.5094000000  | 842.5106647185  | 842.5091292504  | 842.5094000000  | 842.5094000000  | 842.5094000000  |
| 855.0485057907  | 856.5278633484  | 855.0363453628  | 870.5370425172  | 856.5162288932  | 850.4529276680  |
| 861.0615763382  | 864.4992522709  | 856.5272825918  | 877.0511540894  | 870.5374181717  | 870.5348295834  |
| 870.5332496977  | 870.5437830577  | 861.0543405580  | 1045.5557453997 | 877.0364529924  | 877.0400841884  |
| 954.5334679668  | 877.0498200282  | 870.5435789807  | 1061.5381216490 | 1045.5549109009 | 1036.5226654678 |
| 1045.5518466778 | 880.4710245236  | 1045.5650094472 | 1104.6043641296 | 1106.0615780435 | 1041.5946935817 |
| 1062.5693740617 | 893.0249576680  | 1126.5760442945 | 1106.0580888585 | 1132.5265231620 | 1045.5546920389 |
| 1090.5425113726 | 995.6216188441  | 1142.5885872723 | 1106.5617631547 | 1142.5913143752 | 1082.5542710191 |
| 1106.5799154608 | 1045.5617102393 | 1165.5834035689 | 1142.5965207766 | 1198.6911574025 | 1090.5255678631 |
| 1142.6034923619 | 1075.5215172872 | 1179.5997814757 | 1179.5898221959 | 1566.7767292408 | 1106.0578075225 |
| 1234.6634390968 | 1179.5950407859 | 1234.6721958024 | 1194.6366084805 | 1790.8635422029 | 1106.5587411086 |
| 1267.6874036923 | 1224.6167032241 | 1320.5756503028 | 1383.6760999161 | 1794.8055664504 | 1142.5940279271 |
| 1274.6468142371 | 1267.6959112153 | 1365.6377902681 | 1407.6944784094 | 1954.0391891496 | 1179.5902437591 |
| 1277.6821911305 | 1287.6066596610 | 1475.7546823291 | 1442.7763595471 | 2196.2509222192 | 1198.6871434488 |
| 1475.7311487217 | 1300.5220117553 | 1493.7273540168 | 1475.7405103771 | 2211.1040000001 | 1222.6271490350 |
| 1613.8967635953 | 1307.6619107833 | 1535.8947228877 | 1544.8209271809 | 2225.0956428742 | 1234.6602326939 |
| 1638.8338675057 | 1434.6862595698 | 1664.9397233801 | 1564.8532283899 | 2233.0699831618 | 1242.6277359463 |
| 1647.8309055922 | 1443.7011852226 | 1707.7631230655 | 1592.8835019932 | 2239.1289005108 | 1307.6640758950 |
| 1707.7468241305 | 1471.7078915566 | 1940.9224229938 | 1638.8429939984 | 2249.0436860793 | 1320.5846990268 |
| 1733.8720697306 | 1475.7437417304 | 1993.9653935114 | 1707.7537853203 | 2255.0470267101 | 1365.6749595312 |
| 1749.8639335314 | 1479.7808589119 | 2025.0476429768 | 1790.8717526085 | 2265.1066631147 | 1383.6869535809 |
| 1755.8401546773 | 1491.7573440474 | 2085.2461597020 | 1988.0212121017 | 2269.3027006334 | 1385.7168209932 |
| 1780.8386979203 | 1562.7648716164 | 2196.2486069762 | 1993.9632045796 | 2273.0249135346 | 1389.6979713688 |
| 1796.8248693148 | 1647.9814443422 | 2211.1056419280 | 2015.0263488367 | 2275.0009548745 | 1407.6923780664 |
| 1799.8767184801 | 1665.9917926605 | 2225.1199749236 | 2195.2458762862 | 2276.0316312800 | 1418.7132365584 |
| 1803.8350197074 | 1718.8603405743 | 2233.0733560264 | 2197.2372651896 | 2283.1740588068 | 1434.7490950079 |
| 1851.9014817980 | 1759.9342908264 | 2239.1328739571 | 2211.1040000000 | 2285.1493116143 | 1442.7848538522 |
| 1993.9552862234 | 1794.8130712327 | 2243.5684297989 | 2225.1029361512 | 2299.1634774085 | 1453.8173158772 |
| 2195.2255059918 | 1826.7874286457 | 2249.0460964172 | 2233.0802719845 | 2305.1351756390 | 1475.7450404766 |
| 2197.2212135531 | 1832.7601992767 | 2255.0472497763 | 2239.1297081624 | 2321.1251181352 | 1485.7039387025 |
| 2211.1040000000 | 1866.8931480583 | 2268.3243580895 | 2249.0543713135 | 2345.0949587661 | 1493.7202279987 |
| 2225.0982765262 | 1892.8384141838 | 2271.0223320768 | 2255.9777436557 | 2348.0894590191 | 1593.8811141975 |
| 2233.0661717265 | 1914.8101514478 | 2283.1795355026 | 2265.0809721485 | 3290.6853512355 | 1601.7682390972 |
| 2249.0394379709 | 1930.7855218529 | 2285.1461716462 | 2268.3141215896 | 3308.7011050881 | 1627.8611277529 |
| 2255.0444122526 | 1940.9352303078 | 2299.1861790617 | 2273.0247541403 | 3323.7528767400 | 1638.8410255340 |
| 2267.3270581508 | 1993.9665292836 | 2305.1407268276 | 2275.0200784711 | 3337.7580000000 | 1657.7874698192 |
| 2269.2917176951 | 2185.0791103866 | 2321.1267590545 | 2283.1772261822 |                 | 1674.7609414220 |
| 2283.1792135286 | 2185.5854699592 | 2807.3117852962 | 2285.1579211803 |                 | 1684.8963408186 |
| 2299.1647933218 | 2196.2527648973 | 3337.7580023969 | 2299.1614152146 |                 | 1707.7663727105 |
| 2305.1401579056 | 2211.1079040890 | 3794.8014630409 | 2305.1477660189 |                 | 1790.8738243082 |
| 2390.0634015177 | 2225.1205223425 | 3808.8301201740 | 2321.1334202196 |                 | 1838.9167151305 |
| 2705.1564607330 | 2230.2005184056 |                 | 2335.9916254874 |                 | 1919.0525107351 |
| 2851.3818518879 | 2233.0818089231 |                 | 2346.0975747616 |                 | 1922.9314190908 |
| 2870.3924354293 | 2239.1314525302 |                 | 2350.0761435086 |                 | 1954.0227619948 |
| 3323.7486299518 | 2249.0595391726 |                 | 2361.0874562382 |                 | 1993.9651362919 |
| 3337.7580000000 | 2263.0706738822 |                 | 2408.0239034423 |                 | 2012.0778776944 |
| 3353.6783125248 | 2271.0426162850 |                 | 2705.1556314770 |                 | 2047.1352373468 |
| 3452.7482694957 | 2283.1774262643 |                 | 2872.3888140451 |                 | 2150.0687162563 |
|                 | 2285.1161755226 |                 | 3290.6851923087 |                 | 2195.2245993475 |
|                 | 2298.1869678257 |                 | 3309.7160737133 |                 | 2197.2289844274 |
|                 | 2305.1550875765 |                 | 3323.7424189388 |                 | 2211.1040000001 |
|                 | 2321.1292246084 |                 | 3337.7580000000 |                 | 2225.1035185374 |
|                 | 2383.9433972813 |                 |                 |                 | 2233.0742705344 |
|                 | 2408.0501726820 |                 |                 |                 | 2249.0543472447 |
|                 | 2625.3600125804 |                 |                 |                 | 2255.0517552553 |
|                 | 2663.3146815888 |                 |                 |                 | 2265.0831514352 |
|                 | 2691.2827166103 |                 |                 |                 | 2269.3252124457 |
|                 | 2705.1477890677 |                 |                 |                 | 2273.0206980156 |
|                 | 2748.3082926449 |                 |                 |                 | 2276.0451200732 |
|                 | 2807.3076207799 |                 |                 |                 | 2283.1780723634 |
|                 | 2932.3144823419 |                 |                 |                 | 2285.1547664518 |
|                 | 2934.4480619692 |                 |                 |                 | 2295.1491548617 |
|                 | 2949.3512871638 |                 |                 |                 | 2299.1608190155 |
|                 | 2954.3342991335 |                 |                 |                 | 2305.1472451735 |

2967.3725085297  
2971.3242335919  
2981.3784188181  
2987.2963629889  
3035.5233985834  
3094.6315858222  
3323.7425645612  
3337.7575947620  
3396.5807313809  
3409.5846990913

2321.1278100611  
2346.0905796442  
2365.3163111747  
2383.9622118477  
2705.1560365657  
2872.3911405892  
3010.4541691138  
3052.6173295695  
3290.6865394585  
3323.7396458234  
3337.7580000000

| SSP 2623        | SSP 3020        | SSP 3220        | SSP 3230        | SSP 3301        | SSP 3314        |
|-----------------|-----------------|-----------------|-----------------|-----------------|-----------------|
| 842.5094000000  | 506.0221420496  | 807.3946367134  | 628.0029805372  | 842.5110714947  | 606.2277274767  |
| 855.0489529587  | 508.0196814124  | 832.4797624814  | 643.9816494562  | 855.0590220497  | 643.9748116586  |
| 856.5263647617  | 515.2202807845  | 842.5039999280  | 644.3223936583  | 856.5230923253  | 650.0030682826  |
| 861.0682947429  | 520.1153258727  | 973.5248113727  | 649.9997261368  | 870.5412963605  | 665.9643309679  |
| 870.5359241096  | 522.2289966495  | 995.5152595027  | 665.9781478918  | 1039.5830731533 | 679.4581834384  |
| 975.5597401099  | 524.0324952456  | 1003.5329311427 | 679.4680360200  | 1045.5611371221 | 695.2389765466  |
| 1038.5928237175 | 529.0704849840  | 1033.5083259983 | 842.5093922015  | 1130.5892932474 | 842.5094348121  |
| 1045.5630006770 | 557.1228995311  | 1036.5247641184 | 855.0533897142  | 1144.6333221146 | 850.4470523743  |
| 1088.6326696230 | 560.1751812903  | 1045.5478589760 | 856.5222731498  | 1179.5952445040 | 855.0531789413  |
| 1106.0611430808 | 564.0165283645  | 1060.5493953361 | 861.0692483208  | 1197.6632270166 | 856.5200226412  |
| 1106.5589853138 | 568.0629627962  | 1064.5889227368 | 870.5382899625  | 1229.5926154969 | 861.0612551677  |
| 1110.6086621646 | 604.2638460353  | 1066.4945502069 | 877.0444729184  | 1245.5923495723 | 870.5401291680  |
| 1142.5936111079 | 606.2408664071  | 1074.5127044122 | 945.5452751134  | 1247.6769064088 | 1041.5881803509 |
| 1262.6363217624 | 608.0860086117  | 1082.5883335752 | 976.4490621986  | 1256.6737783255 | 1045.5551116279 |
| 1278.6325953482 | 643.9734911058  | 1090.5228054264 | 1041.6053703529 | 1320.5735924410 | 1073.5341482030 |
| 1385.7070397400 | 649.9998279207  | 1107.5328297593 | 1045.5581139870 | 1357.6928629961 | 1106.5476609063 |
| 1401.7021459120 | 665.9730833971  | 1109.4890394771 | 1106.0561613976 | 1365.6267315907 | 1126.5578402076 |
| 1406.6821872430 | 679.4678131663  | 1157.5872383082 | 1106.5602005207 | 1406.6774499710 | 1142.5739809972 |
| 1417.7280226529 | 695.2028466946  | 1163.6039052403 | 1132.5202099798 | 1435.7443059609 | 1290.6553006456 |
| 1428.6670540998 | 842.5105433790  | 1165.5770094634 | 1142.5959630386 | 1439.7781139758 | 1320.5837581354 |
| 1435.7558918252 | 855.0555271276  | 1172.5274147753 | 1156.5282916364 | 1454.7467791413 | 1365.6306948095 |
| 1439.7861987074 | 856.5230995107  | 1179.5915677041 | 1162.4110642919 | 1475.7381222715 | 1385.6919212820 |
| 1451.7289131389 | 861.0672396127  | 1193.5963290194 | 1171.6334951095 | 1493.7268340710 | 1406.6643262746 |
| 1457.8209284803 | 864.4985390293  | 1194.5528351557 | 1179.5868488715 | 1521.7311381536 | 1435.7293202581 |
| 1479.8001524753 | 870.5405046660  | 1198.6888469998 | 1183.8996446547 | 1535.8708825491 | 1439.7468013544 |
| 1483.7131927487 | 995.6096167506  | 1203.6236927912 | 1198.7022875836 | 1601.7916042641 | 1592.9095044286 |
| 1498.7500187467 | 1045.5618042231 | 1234.6644518968 | 1214.6826676244 | 1620.8185192136 | 1601.7746341601 |
| 1527.8409485930 | 1060.0695272469 | 1262.6167880412 | 1220.6711138612 | 1707.7576601311 | 1650.8882915726 |
| 1562.5154929280 | 1066.0682601790 | 1277.6976462623 | 1226.6371869263 | 1780.8102051452 | 1655.9705023245 |
| 1583.7914265696 | 1126.6441902705 | 1300.5556233616 | 1307.6572220540 | 1794.7988056672 | 1674.7725683750 |
| 1601.8143936359 | 1157.6116286394 | 1302.6997503959 | 1475.7413697570 | 1815.8573504193 | 1707.7538612325 |
| 1615.8393491504 | 1179.5937992093 | 1307.6622036720 | 1515.7370763302 | 1826.7774101452 | 1774.8457956475 |
| 1617.8105165532 | 1307.6624416535 | 1320.5746549401 | 1591.7970127403 | 1833.8954166370 | 1889.5729418104 |
| 1623.7918437462 | 1475.7437019184 | 1323.6681644494 | 1601.7571460456 | 1965.0042957827 | 1965.2631461946 |
| 1650.9219814429 | 1638.8513909595 | 1329.7030688332 | 1620.7568883273 | 1988.0106511469 | 2025.1147124355 |
| 1672.8867055028 | 1707.7646869494 | 1337.6976270223 | 1624.8565858912 | 2025.0070422095 | 2122.7079040100 |
| 1780.9605089906 | 1791.7398383685 | 1344.6672199929 | 1638.8323383007 | 2085.2329335675 | 2158.2771859431 |
| 1796.9502067574 | 1794.8133922776 | 1357.7017786822 | 1707.7636805882 | 2196.2451334156 | 2196.2206342938 |
| 1815.8736124553 | 1837.9481246548 | 1365.6255618977 | 1821.7903730910 | 2211.1044806071 | 2211.1039786981 |
| 1831.8673164445 | 1851.9130955743 | 1379.7102441590 | 1954.0584940220 | 2225.1155104650 | 2217.1217715398 |
| 1900.0539697448 | 1892.8687304292 | 1383.6794754104 | 1959.8927123662 | 2233.0671456134 | 2225.1063360841 |
| 1919.1007689611 | 2196.2634555916 | 1393.7291635935 | 1976.0239555228 | 2239.1324715174 | 2233.0735492496 |
| 1922.9614988797 | 2211.1143130595 | 1399.6742682878 | 2194.3612064016 | 2243.5607473510 | 2239.1416445210 |
| 1947.0910579612 | 2225.1224630154 | 1405.6728743836 | 2196.2530955088 | 2249.0433637413 | 2243.7874339352 |
| 1988.0397790922 | 2233.0856702345 | 1407.6971450813 | 2211.1040145649 | 2255.0558188026 | 2249.0519644852 |
| 2003.9758926042 | 2247.0772116188 | 1434.7562947312 | 2225.1037320670 | 2266.1084705799 | 2255.0568360869 |
| 2010.0335011803 | 2249.0595340314 | 1438.6907347984 | 2233.0734975103 | 2268.3095427858 | 2265.2303492053 |
| 2023.0035303732 | 2255.0665994765 | 1455.6820751038 | 2249.0523783163 | 2271.0155340573 | 2268.2682457079 |
| 2038.0834390249 | 2283.1706394102 | 1458.7225914094 | 2255.0601725757 | 2283.1821991532 | 2271.1018554207 |
| 2056.9788848141 | 2285.1263697074 | 1460.7866541228 | 2265.1243266163 | 2299.1845421040 | 2283.1777239463 |
| 2060.9933269778 | 2299.1573688841 | 1475.7513157615 | 2267.4043883871 | 2305.1483519023 | 2285.1177414124 |
| 2085.0085990054 | 2383.9447047615 | 1483.7385102122 | 2269.2767966465 | 2321.1200086380 | 2299.1669258942 |
| 2132.0467428957 | 2501.2385934452 | 1493.7224987086 | 2272.0228486986 | 2383.9548513708 | 2301.1141224505 |
| 2211.1040000001 | 2705.1512326945 | 1497.7456093604 | 2276.1508239038 | 2398.9961147592 | 2305.1492236607 |
| 2225.1097679938 | 2949.3375706087 | 1515.7198025901 | 2283.1779229496 | 2410.2362500785 | 2307.0968806271 |
| 2226.5676814882 | 3337.7484227173 | 1537.6958118547 | 2285.1525995140 | 2807.3090340907 | 2321.1160104828 |
| 2230.2240837662 | 3369.5063722993 | 1638.8473362912 | 2294.1997143159 | 3094.5695326853 | 3337.7576961486 |
| 2233.0901580295 | 3440.5548738913 | 1657.7804520152 | 2299.1634849167 | 3337.7572117264 |                 |
| 2249.0620691648 |                 | 1707.7639364302 | 2305.1468109718 | 3794.8161161304 |                 |
| 2260.2652204858 |                 | 1716.8371910282 | 2322.1882567311 |                 |                 |
| 2266.0915091733 |                 | 1726.8718010133 | 2778.1938504389 |                 |                 |
| 2283.1721750940 |                 | 1757.8702957554 | 3139.5950786594 |                 |                 |
| 2299.1579490521 |                 | 1790.8783549884 | 3183.6246098759 |                 |                 |
| 2305.1557186421 |                 | 1838.9065603736 | 3291.6950965507 |                 |                 |



2318.1476213617  
2675.3848368406  
3337.7580000000  
3714.8995658800  
3842.9860988199

1851.9107829090  
1857.9114852506  
1867.9143266078  
1890.9532863546  
1897.8713992630  
1908.8072945344  
1993.9703781184  
2047.0537146373  
2054.1091673555  
2055.8827971313  
2064.1305668095  
2086.9732104866  
2150.0701748159  
2184.1088925143  
2211.0921173250  
2224.1216375041  
2256.0448309181  
2283.1742785030  
2285.9644586589  
2367.2512981106  
2383.9482847920  
2399.0135385778  
2509.1411364613  
2705.1561835664  
2717.0862515945  
2872.4036931378  
2888.4113129530  
2902.4203349009  
3038.4482593872  
3048.5076828811  
3052.6383704069  
3264.5398695795  
3312.3237719996

3337.7581079683

| SSP 3503        | SSP 3505        | SSP 3806        | SSP 4005        | SSP 4006        | SSP 4011        |
|-----------------|-----------------|-----------------|-----------------|-----------------|-----------------|
| 842.5094000000  | 842.5073339431  | 805.4918509133  | 842.5094000000  | 842.5094000000  | 842.5099541438  |
| 855.0484039017  | 856.5126324494  | 811.3767374708  | 855.0561434299  | 856.5166762880  | 855.0709251719  |
| 856.5117835321  | 870.5327787796  | 830.4456046446  | 856.5207764353  | 870.5351480927  | 856.5200495485  |
| 861.0557162956  | 973.5172597764  | 842.5094000000  | 861.0628158712  | 877.0351349441  | 864.5035971991  |
| 870.5378137804  | 1003.5352152332 | 856.5222851960  | 862.5040583924  | 944.5227036291  | 870.5456798515  |
| 945.5400595972  | 1038.5663620666 | 870.5349258125  | 870.5395665850  | 1035.6041203986 | 990.4932837284  |
| 976.4595300611  | 1045.5572867322 | 871.5039231042  | 877.0410828761  | 1045.5561907675 | 1045.5627812053 |
| 980.4860998810  | 1064.5900636932 | 876.4823725320  | 924.4435586355  | 1106.0611164177 | 1087.5540624750 |
| 1045.5574847320 | 1079.6071839623 | 896.4616278803  | 1045.5609339859 | 1106.5617915903 | 1316.6566887165 |
| 1106.0528798008 | 1090.5197488315 | 927.4845432757  | 1087.5425120443 | 1142.6013781225 | 1348.6482599265 |
| 1106.5585263993 | 1106.0488390901 | 935.5274804771  | 1106.0569291909 | 1179.5896970674 | 1593.8292425465 |
| 1130.5491129317 | 1106.5503005846 | 961.0007657231  | 1106.5581856674 | 1198.6888190583 | 1794.8183528599 |
| 1132.5201689006 | 1142.5894835955 | 981.4398870385  | 1142.5945804437 | 1475.7431297955 | 1892.8382322639 |
| 1142.5836971559 | 1165.5736393427 | 986.5090435808  | 1150.5797835061 | 1499.6749475929 | 1992.521505014  |
| 1179.5879171326 | 1179.5858973078 | 1012.4431873918 | 1165.5754799974 | 1516.6947511116 | 2196.2609926311 |
| 1198.6950668463 | 1234.6588482179 | 1018.8683609304 | 1179.6030860516 | 1638.8298559725 | 2211.1089981929 |
| 1475.7409180247 | 1240.6195563994 | 1020.5081217357 | 1194.6279150472 | 1707.7553092323 | 2225.1196310492 |
| 1493.7264484242 | 1251.6366577024 | 1034.5053611315 | 1211.6604975371 | 1772.8556851655 | 2230.2020215946 |
| 1515.7295300115 | 1262.6307165072 | 1039.5811140061 | 1235.5095144479 | 1790.8856256921 | 2233.0932706947 |
| 1516.7123532556 | 1270.7061525322 | 1045.5583616342 | 1268.7177037268 | 1812.8629820979 | 2247.1106126441 |
| 1707.7677379634 | 1277.6877059186 | 1088.5732766684 | 1285.6454263122 | 1852.8314176290 | 2249.0738576154 |
| 1790.8794804606 | 1294.6786572031 | 1090.5230670519 | 1302.6519182244 | 1993.9563316096 | 2278.1290112514 |
| 1794.7897119911 | 1320.5773042161 | 1097.4970423211 | 1303.6196454931 | 2014.9232514670 | 2283.1755664870 |
| 1954.0508186198 | 1357.6978120887 | 1129.5898425530 | 1308.6418969323 | 2196.2367266070 | 2285.1440582556 |
| 2194.3255304259 | 1365.6317334974 | 1177.6555673070 | 1315.7390353296 | 2211.1040000000 | 2292.0600248401 |
| 2196.2491763199 | 1383.6749674031 | 1179.5921507603 | 1320.5739700196 | 2215.0513976907 | 2299.1770118544 |
| 2211.1040000000 | 1385.6998759813 | 1185.6778784898 | 1365.6240290681 | 2225.0992607282 | 2691.2679566469 |
| 2216.0459821201 | 1394.7599134680 | 1191.6218347917 | 1383.6831911861 | 2233.0727629511 | 2807.2990462621 |
| 2225.1052760443 | 1406.6706540927 | 1195.6384159906 | 1475.7442038882 | 2249.0425539969 | 2934.4459594493 |
| 2233.0735368024 | 1435.7418047819 | 1210.5775779216 | 1479.7671893927 | 2255.0457534900 | 2949.3358688722 |
| 2243.8062644747 | 1439.7644532509 | 1213.6222995676 | 1493.7269093917 | 2265.0687766751 | 3323.7182891928 |
| 2249.0508261067 | 1475.7393660827 | 1217.6222490458 | 1638.8574802858 | 2267.3037607242 | 3337.7332258792 |
| 2255.0580831972 | 1493.7196114821 | 1228.6184818638 | 1707.7550442287 | 2269.3023151704 | 3348.6003299993 |
| 2267.3503863374 | 1601.7895621214 | 1251.6881557221 | 1734.9571064938 | 2273.0194626778 |                 |
| 2270.2138120892 | 1638.8373539449 | 1267.6924251626 | 1791.7117058371 | 2275.0143887830 |                 |
| 2283.1811229035 | 1650.8949478711 | 1292.6550866118 | 1794.7998463329 | 2283.1788112061 |                 |
| 2285.1491854732 | 1707.7497398116 | 1308.6472637718 | 1844.0119463679 | 2285.1502760329 |                 |
| 2299.1735390225 | 1716.8389732407 | 1313.6267455539 | 1863.0512203582 | 2299.1593598038 |                 |
| 2305.1483671355 | 1794.8141261536 | 1321.6149138313 | 2064.9550919459 | 2305.1457932869 |                 |
| 2321.1256226293 | 1815.8535444547 | 1365.6279446011 | 2194.3648276936 | 2322.1242045905 |                 |
| 2383.9556889539 | 1919.0724367676 | 1372.6856017370 | 2196.2463107450 | 2337.0201170235 |                 |
| 2705.1639945622 | 1988.0221767200 | 1381.7151720366 | 2211.1039999999 | 2343.1330178154 |                 |
| 3183.6239761421 | 1993.9553895794 | 1384.7033487936 | 2225.1065089909 | 2346.0930865846 |                 |
| 3309.7327607766 | 2195.2447949322 | 1396.7814202769 | 2233.0774491139 | 2361.0822563845 |                 |
| 3337.7580000000 | 2197.2331575395 | 1400.6722834937 | 2243.6642623447 | 3323.7485890817 |                 |
|                 | 2211.0950167226 | 1424.6444874629 | 2249.0502294203 | 3337.7580000000 |                 |
|                 | 2218.2713139602 | 1434.7622215849 | 2255.0581666392 |                 |                 |
|                 | 2225.0986754188 | 1441.6505688337 | 2267.3389420687 |                 |                 |
|                 | 2233.0700779201 | 1460.7652199403 | 2272.0286206604 |                 |                 |
|                 | 2243.6784920282 | 1475.7436753611 | 2283.1777382249 |                 |                 |
|                 | 2249.0482026334 | 1493.7250572661 | 2285.1568527161 |                 |                 |
|                 | 2255.0553578555 | 1512.7416021366 | 2299.1630368598 |                 |                 |
|                 | 2267.3484108717 | 1556.7651567807 | 2305.1510993018 |                 |                 |
|                 | 2269.3229951609 | 1566.7702625705 | 2321.1303566690 |                 |                 |
|                 | 2283.1749963671 | 1601.7932634421 | 2383.9446632811 |                 |                 |
|                 | 2285.1315444923 | 1608.8873891236 | 2693.1190504712 |                 |                 |
|                 | 2299.1629250895 | 1615.8372757505 | 2705.1572494850 |                 |                 |
|                 | 2301.1517048147 | 1623.7832161812 | 2717.0777198430 |                 |                 |
|                 | 2305.1435283339 | 1628.7976668541 | 3309.7334214831 |                 |                 |
|                 | 2321.1157875280 | 1638.8619758938 | 3337.7580000001 |                 |                 |
|                 | 2872.3903520484 | 1645.8158089896 |                 |                 |                 |
|                 | 3309.7438456620 | 1707.7602943563 |                 |                 |                 |
|                 | 3323.7599983315 | 1723.9492661548 |                 |                 |                 |
|                 | 3337.7781074508 | 1759.9310459775 |                 |                 |                 |

1787.0685175631  
1815.9838752531  
1835.9354179372  
1875.9876806262  
1887.9598927090  
1906.1438678763  
1914.9262904848  
1920.9924078552  
1933.9988033306  
1942.9665984669  
1948.0704491161  
2017.1171215720  
2073.0274227511  
2077.0234203673  
2088.0623129699  
2105.0195192889  
2148.0285802269  
2164.9830139341  
2196.2382140262  
2211.1040000000  
2225.1095248108  
2233.0763264036  
2249.0533765607  
2255.0571370273  
2283.1703051633  
2285.1729832740  
2295.1824627871  
2299.1682258041  
2305.1500738122  
2321.1317814415  
2341.1344566073  
2647.2432334811  
2872.3926234508  
3309.7313691246  
3337.7580000000  
3524.7132704732

| SSP 4107        | SSP 4207        | SSP 4315        | SSP 4419        | SSP 4611        | SSP 5009        |
|-----------------|-----------------|-----------------|-----------------|-----------------|-----------------|
| 831.5079243042  | 842.5094000000  | 842.5107118303  | 842.5094000000  | 842.5094000000  | 842.5094000000  |
| 842.5094000000  | 855.0524811422  | 870.5394649622  | 855.0572915797  | 856.5151843114  | 870.5361904354  |
| 856.5185143494  | 856.5222843114  | 1045.5668782694 | 856.5220635332  | 870.5357090801  | 877.0410194846  |
| 861.0688625508  | 861.0691285001  | 1106.0750929845 | 861.0681234385  | 1045.5559802393 | 1045.5492739231 |
| 870.5386433518  | 870.5384490865  | 1106.5753587139 | 870.5403730294  | 1106.0603786894 | 1106.0553159211 |
| 877.0491455402  | 916.5294615263  | 1142.6038041770 | 927.4892351358  | 1142.5934883752 | 1107.5583996290 |
| 941.4744269998  | 945.5457149855  | 1188.6709344654 | 972.4841251928  | 1344.7014862107 | 1142.0893442284 |
| 972.8247147237  | 976.4488324894  | 1197.6760718778 | 1018.5412732020 | 1389.6945535930 | 1142.5924473864 |
| 987.6060563550  | 996.5127047732  | 1256.6947405456 | 1045.5625731321 | 1475.7382340818 | 1217.6154154751 |
| 1015.5462647219 | 1038.5777489070 | 1386.7647819452 | 1056.5732403431 | 1593.8763366352 | 1228.6094742306 |
| 1045.5566160777 | 1045.5574057336 | 1400.6858710737 | 1106.0563477712 | 1684.8861747492 | 1430.6719436920 |
| 1067.5614160470 | 1106.0560502464 | 1406.6927673492 | 1107.5546256201 | 1707.7606168213 | 1536.7805143848 |
| 1104.5060373359 | 1106.5548994820 | 1435.7520309039 | 1142.5933008530 | 1766.7761914979 | 1555.7741563787 |
| 1119.6054963006 | 1132.5176728160 | 1475.7497220063 | 1149.5962805253 | 1794.8052920229 | 1566.7694814529 |
| 1132.5227444452 | 1142.6205997274 | 1514.7511805503 | 1150.0902981557 | 1919.0470268270 | 1588.7484196338 |
| 1142.6044843995 | 1150.5828972012 | 1527.8551539194 | 1226.5926755190 | 2195.2240249953 | 1604.8434308366 |
| 1145.5973901142 | 1179.5904414766 | 1591.7602518840 | 1311.7290429900 | 2197.2363286396 | 1626.8083138961 |
| 1163.6174776266 | 1198.6961044236 | 1601.8056440776 | 1467.8290594702 | 2211.1040000001 | 1629.6925556019 |
| 1175.6078799448 | 1235.5523949365 | 1648.7696723151 | 1623.7793200824 | 2225.1003019525 | 1673.8425302706 |
| 1179.6037513853 | 1246.6607593624 | 1661.8123253006 | 1639.8140752601 | 2233.0676222343 | 1707.7538506562 |
| 1185.6045784315 | 1262.6211100423 | 1667.8100672707 | 1707.7714285760 | 2249.0477304219 | 1795.8127683186 |
| 1198.6812952654 | 1307.6573408643 | 1707.7770387418 | 1794.8065788874 | 2255.0573870702 | 1814.8546216624 |
| 1516.6925320346 | 1320.5713440472 | 1755.0020035080 | 1810.8819546922 | 2265.1015271484 | 1833.8888352360 |
| 1783.9095794468 | 1365.6246127759 | 1780.8479183257 | 1898.9782591620 | 2267.4069915847 | 1869.9453859679 |
| 1790.8793699368 | 1383.6803840478 | 1790.8861418001 | 1932.0208259408 | 2269.2988290367 | 1887.9611045467 |
| 1805.8915981031 | 1385.6955487318 | 1794.8250959705 | 2086.8261155368 | 2273.0174383291 | 1949.8777145547 |
| 1887.9648728108 | 1406.6698422369 | 1818.8575645552 | 2189.0534916304 | 2276.0452288389 | 1996.9994856590 |
| 1905.9773157446 | 1434.7506132228 | 1943.8999412361 | 2194.3573141427 | 2283.1766186426 | 2016.0485138930 |
| 2196.2462890696 | 1439.7771661980 | 1988.0333993090 | 2196.2484954471 | 2285.1528221796 | 2195.2370393218 |
| 2211.1040000000 | 1475.7508979299 | 2000.9928317868 | 2211.1040000000 | 2299.1621292743 | 2211.1040000001 |
| 2216.0528976989 | 1493.7216185600 | 2022.9768418148 | 2225.1064557351 | 2305.1428510881 | 2225.1051035396 |
| 2225.0970752442 | 1515.7350975866 | 2038.9739438142 | 2233.0798120561 | 2321.1262239334 | 2233.0788300630 |
| 2233.0746214084 | 1601.7989911990 | 2056.9901811767 | 2243.6188801386 | 2346.0882301389 | 2249.0468997930 |
| 2243.6687253827 | 1638.8421035929 | 2195.2370858754 | 2244.6258528552 | 2560.2311837016 | 2255.0628782573 |
| 2249.0484066714 | 1650.9059732736 | 2211.1209993393 | 2249.0504496916 | 3290.6816530343 | 2273.0197163197 |
| 2255.0607344735 | 1657.7833641068 | 2225.1181274855 | 2255.0611171255 | 3337.7580000000 | 2275.0196233356 |
| 2265.1289415535 | 1707.7567172519 | 2233.0928531567 | 2267.3657047768 |                 | 2283.1774267452 |
| 2268.4106535895 | 1791.7472850513 | 2249.0658221986 | 2269.2717859958 |                 | 2299.1643478082 |
| 2269.2777432986 | 1794.8094053814 | 2255.0716806760 | 2271.0223036647 |                 | 2305.1522894696 |
| 2271.0255471596 | 1804.9372788483 | 2268.3142588199 | 2283.1772947172 |                 | 2321.1326583637 |
| 2283.1781561648 | 1827.9509941159 | 2273.0365115789 | 2285.1584961666 |                 | 2335.9538606025 |
| 2285.1590122804 | 1837.9296212269 | 2275.0365400830 | 2299.1725926405 |                 | 2345.0884352964 |
| 2299.1637784276 | 1851.9100721000 | 2283.1929755848 | 2301.1520985111 |                 | 2348.0945146524 |
| 2305.1509310678 | 1919.0780232673 | 2299.1750062684 | 2305.1537231508 |                 | 2399.0073897987 |
| 2321.1296338712 | 1954.0480977644 | 2305.1589436270 | 2321.1340179066 |                 | 2483.2380442446 |
| 3183.6211186986 | 1993.9661961520 | 2321.1468253952 | 2585.1143898887 |                 | 3337.7580000000 |
| 3309.7324929002 | 2170.8847035164 | 2346.1057862690 | 2778.3596466391 |                 |                 |
| 3324.7460861006 | 2196.2416092596 | 2562.2813088357 | 3337.7580000000 |                 |                 |
| 3337.7580000000 | 2211.1040000000 | 2581.3230033729 |                 |                 |                 |
|                 | 2225.1060791839 | 2603.2954376426 |                 |                 |                 |
|                 | 2233.0742632438 | 2793.4709797909 |                 |                 |                 |
|                 | 2243.6742718533 | 3337.7787923286 |                 |                 |                 |
|                 | 2249.0514313201 |                 |                 |                 |                 |
|                 | 2255.0550073976 |                 |                 |                 |                 |
|                 | 2266.0945234572 |                 |                 |                 |                 |
|                 | 2269.2934368056 |                 |                 |                 |                 |
|                 | 2271.0256983551 |                 |                 |                 |                 |
|                 | 2283.1775034830 |                 |                 |                 |                 |
|                 | 2285.1579394887 |                 |                 |                 |                 |
|                 | 2299.1648519326 |                 |                 |                 |                 |
|                 | 2301.1616726906 |                 |                 |                 |                 |
|                 | 2305.1496305066 |                 |                 |                 |                 |
|                 | 2321.1304097546 |                 |                 |                 |                 |
|                 | 2335.2103285259 |                 |                 |                 |                 |

2383.9501244879  
2463.3102220322  
2705.1576859498  
2987.5256821849  
3183.6062940741  
3309.7252338099  
3312.3004658890  
3337.7580000000

| SSP 5104        | SSP 5107        | SSP 5230        | SSP 5424        | SSP 5711        | SSP 6113        |
|-----------------|-----------------|-----------------|-----------------|-----------------|-----------------|
| 842.5037018711  | 830.4507606580  | 842.5094000000  | 830.4554741271  | 842.5094000000  | 831.5046638542  |
| 866.4666723586  | 842.5094000000  | 870.5357661160  | 842.5133149273  | 856.5192703353  | 842.5094000000  |
| 870.5339986490  | 855.0590652275  | 877.0313482850  | 855.0617986224  | 870.5345971644  | 856.5177157099  |
| 923.5565562416  | 856.5197937855  | 939.5325462490  | 856.5212483066  | 1015.4720274250 | 870.5366800180  |
| 998.4772747389  | 861.0723051973  | 1023.5685016880 | 861.0695497480  | 1045.5575283160 | 877.0333623497  |
| 1035.6182401331 | 870.5375140969  | 1032.9998318403 | 870.5427735556  | 1106.0697684858 | 987.6122702015  |
| 1036.6285068659 | 877.0486475882  | 1035.5263078931 | 1045.5609081452 | 1142.5934107083 | 1015.5418564683 |
| 1045.5518156577 | 1045.5575180408 | 1036.5431336779 | 1064.5971155860 | 1187.6543126982 | 1045.5596757289 |
| 1064.6291635578 | 1106.0589930310 | 1045.5539500724 | 1090.5293633237 | 1290.6233496872 | 1049.5328490523 |
| 1106.0522168993 | 1132.5242964479 | 1086.4834892308 | 1106.5589080336 | 1361.7062736484 | 1106.0591974533 |
| 1132.5141768321 | 1179.5924259763 | 1093.5432772368 | 1132.5206154594 | 1485.7260160059 | 1106.5670019743 |
| 1147.6000968146 | 1195.6618670467 | 1094.5236818735 | 1142.6005599765 | 1694.8063522779 | 1142.6015224904 |
| 1163.6158052231 | 1225.6783109383 | 1106.0682286656 | 1179.5970542238 | 1794.7920674303 | 1163.6163177472 |
| 1164.6264070326 | 1251.6958794600 | 1106.5664390671 | 1234.6736716431 | 2193.0166446991 | 1179.5964546358 |
| 1198.6849489502 | 1267.6954750893 | 1111.5487182290 | 1251.7015911336 | 2194.2516957490 | 1320.5752557370 |
| 1225.6756224254 | 1337.6894419530 | 1142.6109897213 | 1267.6999757470 | 2196.2284187664 | 1462.7639052168 |
| 1348.7399591685 | 1348.6555838040 | 1149.5847668816 | 1307.6635996736 | 2211.1039999999 | 1475.7338776556 |
| 1359.7789904462 | 1359.7838757559 | 1185.6538906510 | 1320.5932860225 | 2225.0870016347 | 1707.7509372821 |
| 1499.6620811602 | 1384.7123454363 | 1244.6127925478 | 1348.6512767102 | 2233.0602652967 | 1783.9070565750 |
| 1516.6840537001 | 1434.7497563328 | 1306.6778757640 | 1357.7093689857 | 2239.1025520738 | 1905.9714398906 |
| 1592.2947091906 | 1475.7409676370 | 1396.8410777940 | 1365.6359844128 | 2243.8371418034 | 1991.9189323643 |
| 1592.7983815164 | 1493.7288317873 | 1406.6878313946 | 1384.7164115814 | 2249.0366375795 | 2008.9060009084 |
| 1623.8212403049 | 1624.7625050205 | 1418.7990834902 | 1434.7622171610 | 2255.0408797006 | 2194.2963786262 |
| 1629.8008175045 | 1638.8471689662 | 1444.6565301016 | 1475.7503993942 | 2260.0516444987 | 2196.2394715863 |
| 1639.8226293825 | 1707.7595913676 | 1458.7555983748 | 1493.7280800133 | 2265.0962507007 | 2211.1040000000 |
| 1644.7769238939 | 1790.8751915007 | 1460.6912997846 | 1515.7304989528 | 2268.3127253648 | 2225.0978878576 |
| 1745.8626944091 | 1794.8031681463 | 1542.8379960674 | 1638.8548020495 | 2273.0217344126 | 2233.0677438947 |
| 1772.8550072520 | 2125.1206009003 | 1588.7650575985 | 1657.7891530777 | 2275.0124971775 | 2249.0426543664 |
| 1790.8848809703 | 2196.2462681559 | 1606.8287756018 | 1707.7676698671 | 2283.1743294306 | 2255.0497022268 |
| 1796.8891322927 | 2202.1501073691 | 1724.8462249575 | 1759.9409482994 | 2285.1333675706 | 2265.1028354164 |
| 1812.8654488995 | 2211.1040000000 | 1771.9737662909 | 1790.8887491410 | 2299.1557223348 | 2269.3154159407 |
| 1828.8386523664 | 2225.1018450689 | 1777.8525687886 | 1838.9154411376 | 2305.1288088762 | 2273.0166785036 |
| 2125.1191028978 | 2233.0818313701 | 1794.8092463008 | 1954.0591463127 | 2321.1076658107 | 2275.0084813555 |
| 2175.5701294313 | 2249.0442694880 | 1844.8936235896 | 2196.2617833388 | 2337.0451374919 | 2283.1729643141 |
| 2211.0951357180 | 2255.0582542659 | 1908.8693626936 | 2202.1583420137 | 2346.0884543922 | 2285.1404986421 |
| 2215.0665164455 | 2271.0305277278 | 1939.9437535050 | 2211.1176779843 | 3290.6767641255 | 2299.1601005205 |
| 2231.0593331286 | 2283.1736655184 | 1998.0720298740 | 2217.0704172471 | 3308.6965664950 | 2305.1351795519 |
| 2233.0914157598 | 2285.1510554135 | 2064.9815732400 | 2225.1221464040 | 3323.7440572429 | 2321.1093722064 |
| 2249.0490793992 | 2299.1585193227 | 2155.0507431465 | 2233.0885920094 | 3337.7580000001 | 2346.0872201503 |
| 2283.1683499394 | 2305.1431461022 | 2195.2230247004 | 2249.0622126593 |                 | 3290.6804199905 |
| 2299.1599615176 | 2321.1223906779 | 2211.1040000000 | 2255.0698269541 |                 | 3308.6895946579 |
| 2305.1490787608 | 2443.0655404842 | 2225.1032943420 | 2283.1828329490 |                 | 3323.7360934221 |
| 2324.1343144632 | 2845.3833999046 | 2233.0714362648 | 2285.1822953021 |                 | 3337.7580000000 |
| 2343.1529855722 | 3290.6774333920 | 2249.0507446773 | 2299.1755902296 |                 |                 |
| 2371.1511613334 | 3337.7580000000 | 2273.0227550357 | 2305.1640321093 |                 |                 |
| 2443.0556940135 |                 | 2283.1754972996 | 2322.1746346855 |                 |                 |
| 2550.1734893277 |                 | 2285.1550957761 | 2383.9625168709 |                 |                 |
| 2730.3053867574 |                 | 2299.1637459313 | 2399.0273115001 |                 |                 |
| 3183.6617058542 |                 | 2305.1425014350 | 2872.4207384340 |                 |                 |
| 3199.6598257354 |                 | 2321.1267327326 | 3183.6437630674 |                 |                 |
| 3205.6430222834 |                 | 2346.0944273260 | 3337.7901787642 |                 |                 |
| 3337.8141667254 |                 | 2371.2344636251 |                 |                 |                 |
|                 |                 | 3337.7580000000 |                 |                 |                 |



| <b>SSP 7123</b> | <b>SSP 7519</b> | <b>SSP 8308</b> |
|-----------------|-----------------|-----------------|
| 842.5094000000  | 842.5070062481  | 842.5094000000  |
| 855.0573351700  | 854.0578616513  | 857.4839124007  |
| 856.5201777007  | 870.5346993762  | 900.4863958674  |
| 861.0679084269  | 877.0403627857  | 958.5663394134  |
| 870.5396227908  | 893.0146933252  | 973.9550963086  |
| 877.0426467631  | 1045.5516756889 | 985.5595422757  |
| 918.5121611798  | 1106.0598852528 | 995.5360891220  |
| 928.4954220905  | 1106.5566742289 | 1045.5586474213 |
| 962.5000376494  | 1142.5976697471 | 1075.5445791471 |
| 1045.5567963314 | 1172.5317057966 | 1118.4926171567 |
| 1091.5199357611 | 1341.6662596294 | 1134.4952036088 |
| 1106.0574482138 | 1352.6655528968 | 1160.1016396161 |
| 1106.5571708929 | 1363.6450294670 | 1174.6007825555 |
| 1117.5633481398 | 1370.6817105542 | 1299.6724620552 |
| 1142.5932840610 | 1469.7507105343 | 1353.6468765902 |
| 1179.5803855552 | 1475.7296424402 | 1371.6641381533 |
| 1212.6419618006 | 1497.7178707420 | 1379.6411395519 |
| 1373.7159916616 | 1515.7372455166 | 1393.6501481712 |
| 1462.7513926073 | 1577.6767736955 | 1414.7032278680 |
| 1475.7377252345 | 1619.7682351322 | 1475.7286396663 |
| 1478.7324807825 | 1638.8328819959 | 1527.7582411517 |
| 1484.7232905365 | 1657.7648848997 | 1535.7468922633 |
| 1494.7339146980 | 1664.7410805597 | 1551.7665844176 |
| 1500.7082240140 | 1707.7606879083 | 1570.8029770856 |
| 1506.7187239329 | 1862.8030202114 | 1581.7243517060 |
| 1510.7283760839 | 1904.8975838789 | 1598.7828086120 |
| 1522.7224310193 | 2196.2317926340 | 1604.7789988942 |
| 1794.8030779501 | 2211.0931711144 | 1632.7286338122 |
| 2196.2570886752 | 2225.0889872299 | 1638.8454405337 |
| 2211.1040000000 | 2233.0632425693 | 1661.8140280350 |
| 2225.1078361254 | 2249.0376612727 | 1666.8517847895 |
| 2233.0738875623 | 2255.0392880149 | 1692.8794358279 |
| 2244.6265043043 | 2267.2967464803 | 1709.8159053815 |
| 2249.0440650732 | 2273.0108112530 | 1791.8610832463 |
| 2255.0578912054 | 2275.0049242440 | 1821.8988527044 |
| 2267.2628369307 | 2283.1656057168 | 1838.9039671136 |
| 2269.3343025489 | 2285.1435788701 | 1946.8898546029 |
| 2271.0289208286 | 2299.1453173335 | 1962.9213453316 |
| 2283.1763067119 | 2305.1384519540 | 1990.9507421119 |
| 2285.1547358553 | 2321.1131035449 | 1993.9605795899 |
| 2299.1605033561 | 2335.9374584108 | 2004.9493756501 |
| 2305.1476180634 | 2346.0837138941 | 2008.8287692889 |
| 2321.1253549754 | 2398.8607871592 | 2019.9692923527 |
| 2383.9596065440 | 2408.0018306038 | 2021.9965927612 |
| 3337.7580000000 | 2575.2732990617 | 2051.0173048171 |
|                 | 2703.3789444362 | 2094.9716128585 |
|                 | 2705.1415126855 | 2132.0764066755 |
|                 | 3337.7562146520 | 2150.0683369731 |
|                 |                 | 2211.1040000000 |
|                 |                 | 2225.1060141545 |
|                 |                 | 2233.0795057752 |
|                 |                 | 2249.0576885100 |
|                 |                 | 2273.0211329804 |
|                 |                 | 2275.0167349775 |
|                 |                 | 2283.1754637108 |
|                 |                 | 2285.1577666489 |
|                 |                 | 2299.1620086454 |
|                 |                 | 2303.3500672996 |
|                 |                 | 2306.1853892346 |
|                 |                 | 2319.1928478019 |
|                 |                 | 2346.0946630094 |
|                 |                 | 2381.1055759325 |
|                 |                 | 3052.6268883292 |
|                 |                 | 3337.7580000000 |
