# Supplementary material
Source: PubMed Central journal article supplement (PMC11115173)
Supplement: 18_2011_752_MOESM12_ESM.pdf [file 18_2011_752_MOESM12_ESM.pdf]

# Protein-Profiling of Genomic Instability in Endometrial Cancer

Timo Gemoll<sup>1,2,3</sup>, Jens K. Habermann<sup>1,2</sup>, Johanna Lahmann<sup>2</sup>,  
Silke Szymczak<sup>4</sup>, Caroline Lundgren<sup>5</sup>, Nana K. Bündgen<sup>2</sup>, Thomas  
Jungbluth<sup>2</sup>, Britta Nordström<sup>5</sup>, Susanne Becker<sup>3</sup>, Marta I. Lomnytska<sup>3,5</sup>,  
Hans-Peter Bruch<sup>2</sup>, Andreas Ziegler<sup>4</sup>, Ulf Hellman<sup>6</sup>, Gert Auer<sup>3</sup>, Uwe J.  
Roblick<sup>1,2</sup>, and Hans Jörnvall<sup>1</sup>

(1) Department of Medical Biochemistry and Biophysics, Karolinska Institutet, SE-17177 Stockholm, Sweden

(2) Department of Surgery, University of Lübeck, D-23538 Lübeck, Germany

(3) Karolinska Biomic Center, Karolinska Institutet, SE-17176 Stockholm, Sweden

(4) Institute of Medical Biometry and Statistics, University of Lübeck, D-23562 Lübeck, Germany

(5) Department of Oncology, Radiumhemmet, Karolinska University Hospital, SE-17176 Stockholm, Sweden

(6) Ludwig Institute for Cancer Research, Ltd., SE-75124 Uppsala, Sweden

Address for correspondence:

Professor Hans Jörnvall, MD  
Department of Medical Biochemistry and Biophysics  
Scheeles väg 2  
Karolinska Institutet  
SE-17177 Stockholm, Sweden  
Phone: +46-8-524 877 02  
Fax: +46-8-33 74 62  
Mail: [Hans.Jornvall@ki.se](mailto:Hans.Jornvall@ki.se)

&

Jens K. Habermann, M.D., Ph.D.  
Laboratory for Surgical Research, Dept. of Surgery  
University Clinic Schleswig-Holstein, Campus Lübeck  
Ratzeburger Allee 160  
D-23538 Lübeck, Germany  
Phone: +49-451-5002676  
Fax: +49-451-5002069  
Mailto: [Jens.Habermann@gmail.com](mailto:Jens.Habermann@gmail.com)

S12

SSP 215

| OK | Accession | Entry                 | Description                                        | mW (Da)    | pI (pH)    | PLGS Score  | Probability (%) | Peptides       | Coverage (%) | Mean Error | RMS Error              | Modified (%)         |                      |
|----|-----------|-----------------------|----------------------------------------------------|------------|------------|-------------|-----------------|----------------|--------------|------------|------------------------|----------------------|----------------------|
|    | 14-3-3    | sp P62258 1433E_HUMAN | protein epsilon OS Homo sapiens GN YWHAE PE 1 SV 1 | 29155      | 4.4355     | 9.9628      | 100             | 2              | 8.6275       | 2.6988     |                        | 3.177                |                      |
| OK | m/z       | Charge                | Peak mW                                            | Peptide mW | Delta (Da) | Delta (ppm) | Ladder Score    | Log Likelihood | Start        | End        | Sequence               | Retention Time (min) | Query Tool           |
|    | 628.8022  |                       | 2                                                  | 1255.5887  | 1255.5833  | 0.005483164 | 4.37489         | 66.6667        | 133.6922     | 131        | 141 (R)YLAEFATGNDNR(K) | 22.39                | PLGS Databank Search |
|    | 597.8048  |                       | 2                                                  | 1193.594   | 1193.5928  | 0.001220703 | 1.0227133       | 52.381         | 100.7239     | 143        | 153 (K)EAAENSLVAYK(A)  | 20.36                | PLGS Databank Search |

SSP 1501

| OK | Accession | Entry                | Description                      | mW (Da)    | pI (pH)    | PLGS Score  | Probability (%) | Peptides       | Coverage (%) | Mean Error | RMS Error               | Modified (%)         |                       |
|----|-----------|----------------------|----------------------------------|------------|------------|-------------|-----------------|----------------|--------------|------------|-------------------------|----------------------|-----------------------|
|    | Vimentin  | sp P08670 VIME_HUMAN | OS Homo sapiens GN VIM PE 1 SV 4 | 53619      | 4.8629     | 9.8356      | 100             | 8              | 17.382       | 17.784     |                         | 18.7326              |                       |
| OK | m/z       | Charge               | Peak mW                          | Peptide mW | Delta (Da) | Delta (ppm) | Ladder Score    | Log Likelihood | Start        | End        | Sequence                | Retention Time (min) | Query Tool            |
|    | 558.2982  |                      | 2                                | 1114.5808  | 1114.5619  | 0.01904     | 17.08561        | 66.6667        | 97.0703      | 105        | 113 (K)VELQELNDR(F)     | 20.98                | PLGS Databank Search  |
|    | 585.3666  |                      | 2                                | 1168.7175  | 1168.7067  | 0.01086     | 9.29597         | 71.9298        | 67.0881      | 130        | 139 (K)ILLAELEQLK(G)    | 29.14                | PLGS Databank Search  |
|    | 538.7625  |                      | 2                                | 1075.5094  | 1075.4967  | 0.0127      | 11.80414        | 62.7451        | 75.5171      | 176        | 184 (R)DNLAEEDIMR(L)    | 26                   | PLGS Databank Search  |
|    | 662.326   |                      | 2                                | 1322.6364  | 1322.6101  | 0.02625     | 19.84343        | 55.5556        | 18.7562      | 197        | 207 (K)EEAENLQSF(R)(Q)  | 22.11                | PLGS Databank Search  |
|    | 544.7871  |                      | 2                                | 1087.5586  | 1087.5258  | 0.03284     | 30.19415        | 78.9474        | 153.5165     | 208        | 217 (R)QDVNLSLAR(L)     | 17.52                | PLGS Databank Search  |
|    | 547.2772  |                      | 2                                | 1092.5388  | 1092.5199  | 0.01892     | 17.31858        | 71.9298        | 111.5425     | 295        | 304 (K)FADLSAANR(N)     | 20.55                | PLGS Databank Search  |
|    | 745.8955  |                      | 2                                | 1489.7754  | 1489.7448  | 0.03064     | 20.56705        | 38.6667        | 18.5221      | 322        | 334 (R)QVQSLTCEVDALK(G) | 24.93                | PLGS Databank Search  |
|    | 559.7887  |                      | 2                                | 1117.5618  | 1117.5437  | 0.01807     | 16.16617        | 88.2353        | 64.5908      | 365        | 373 (R)LDIQNMK(E)       | 19.96                | PLGS Databank Search  |
|    |           |                      |                                  |            |            |             |                 |                |              |            |                         |                      | Carbamidomethyl C (7) |

SSP 1607

| OK | Accession | Entry                 | Description                                           | mW (Da)    | pI (pH)    | PLGS Score   | Probability (%) | Peptides       | Coverage (%) | Mean Error | RMS Error                 | Modified (%)         | Missed Cleavages (%) |
|----|-----------|-----------------------|-------------------------------------------------------|------------|------------|--------------|-----------------|----------------|--------------|------------|---------------------------|----------------------|----------------------|
|    | Protein   | sp P07237 PDIA1_HUMAN | disulfide isomerase OS Homo sapiens GN P4HB PE 1 SV 3 | 57980      | 4.5643     | 9.8356       | 100             | 8              | 16.3386      | 4.7348     |                           | 5.2125               | 12.5                 |
| OK | m/z       | Charge                | Peak mW                                               | Peptide mW | Delta (Da) | Delta (ppm)  | Ladder Score    | Log Likelihood | Start        | End        | Sequence                  | Retention Time (min) | Query Tool           |
|    | 496.2795  |                       | 2                                                     | 990.5434   | 990.5386   | 0.004821777  | 4.867834        | 66.6667        | 110.7623     | 223        | 230 (K)ENLLDFIK(H)        | 30.13                | PLGS Databank Search |
|    | 611.9745  |                       | 3                                                     | 1832.9     | 1832.9058  | -0.005737305 | -3.1301692      | 63.2184        | 91.0543      | 286        | 300 (K)ILFIFDSDHDTDNGR(I) | 29.69                | PLGS Databank Search |
|    | 483.792   |                       | 2                                                     | 965.56936  | 965.5596   | 0.009765625  | 10.113964       | 73.3333        | 108.9123     | 301        | 308 (R)ILEFFGLK(K)        | 30.5                 | PLGS Databank Search |
|    | 603.8211  |                       | 2                                                     | 1205.6266  | 1205.6213  | 0.005249023  | 4.353791        | 71.9298        | 153.577      | 317        | 326 (R)LTLEEEMTK(Y)       | 25.07                | PLGS Databank Search |
|    | 484.5702  |                       | 3                                                     | 1450.6871  | 1450.694   | -0.006835938 | -4.7121844      | 37.6812        | 39.5022      | 327        | 338 (K)YKPESELTAER(I)     | 18.07                | PLGS Databank Search |
|    | 607.2743  |                       | 2                                                     | 1212.533   | 1212.5298  | 0.003173828  | 2.617526        | 73.6842        | 88.7031      | 376        | 385 (K)NFEDVAFDEK(K)      | 24.04                | PLGS Databank Search |
|    | 607.2693  |                       | 2                                                     | 1212.523   | 1212.5298  | -0.006835938 | -5.6377482      | 75.4386        | 162.737      | 376        | 385 (K)NFEDVAFDEK(K)      | 23.8                 | PLGS Databank Search |
|    | 485.7731  |                       | 2                                                     | 969.5306   | 969.5283   | 0.002258301  | 2.3292778       | 62.2222        | 120.3209     | 402        | 409 (K)QLAPIWDLK(L)       | 24.7                 | PLGS Databank Search |
|    | 655.3043  |                       | 2                                                     | 1308.593   | 1308.5867  | 0.006347656  | 4.850773        | 71.0145        | 190.5702     | 425        | 436 (K)MDSTANEVAVK(V)     | 17.89                | PLGS Databank Search |
|    |           |                       |                                                       |            |            |              |                 |                |              |            |                           |                      | Oxidation M (1)      |

SSP 2327

| OK | Accession        | Entry                 | Description                                  | mW (Da)    | pI (pH)    | PLGS Score  | Probability (%) | Peptides       | Coverage (%) | Mean Error | RMS Error            | Modified (%)         | Missed Cleavages (%) |
|----|------------------|-----------------------|----------------------------------------------|------------|------------|-------------|-----------------|----------------|--------------|------------|----------------------|----------------------|----------------------|
|    | Thioredoxin-like | sp O43396 TXNL1_HUMAN | protein 1 OS Homo sapiens GN TXNL1 PE 1 SV 3 | 32230      | 4.6432     | 9.8356      | 100             | 4              | 9.3428       | 10.4205    |                      | 11.7745              | 25                   |
| OK | m/z              | Charge                | Peak mW                                      | Peptide mW | Delta (Da) | Delta (ppm) | Ladder Score    | Log Likelihood | Start        | End        | Sequence             | Retention Time (min) | Query Tool           |
|    | 572.7806         |                       | 2                                            | 1143.5455  | 1143.5308  | 0.01477     | 12.91658        | 61.9048        | 90.3991      | 182        | 192 (K)FQPDNGQGPK(Y) | 16.93                | PLGS Databank Search |
|    | 436.7725         |                       | 2                                            | 871.52936  | 871.5279   | 0.00146     | 1.68078         | 58.9744        | 15.1555      | 196        | 202 (K)IFINLPR(S)    | 26.69                | PLGS Databank Search |
|    | 557.2359         |                       | 2                                            | 1112.4562  | 1112.4445  | 0.01172     | 10.53423        | 68.6274        | 56.4203      | 203        | 211 (R)SMDFEEAER(S)  | 20.78                | PLGS Databank Search |
|    | 565.2368         |                       | 2                                            | 1128.458   | 1128.4393  | 0.01868     | 16.55096        | 45.098         | 10.0545      | 203        | 211 (R)SMDFEEAER(S)  | 18.02                | PLGS Databank Search |
|    |                  |                       |                                              |            |            |             |                 |                |              |            |                      |                      | Oxidation M (2)      |

| SSP 2811 |                   |                        |                                                                         |            |            |              |                 |                |              |            |                                        |                                   |                      |                            |
|----------|-------------------|------------------------|-------------------------------------------------------------------------|------------|------------|--------------|-----------------|----------------|--------------|------------|----------------------------------------|-----------------------------------|----------------------|----------------------------|
| OK       | Accession         | Entry                  | Description                                                             | mW (Da)    | pI (pH)    | PLGS Score   | Probability (%) | Peptides       | Coverage (%) | Mean Error | RMS Error                              | Modified (%)                      | Missed Cleavages (%) |                            |
|          | Heat              | sp P07900 HSP90A_HUMAN | shock protein HSP 90 alpha OS Homo sapiens GN HSP90AA1 PE 1 SV 5        | 84606      | 4.747      | 9.8348       | 89.92           | 2              | 3.1421       | 9.0965     |                                        | 9.2505                            |                      |                            |
|          | Putative          | sp Q58FF7 H90B3_HUMAN  | heat shock protein HSP 90 beta 3 OS Homo sapiens GN HSP90AB3P PE 5 SV 1 | 68282      | 4.513      | 9.4553       | 68.36           | 2              | 3.6851       | 10.4574    |                                        | 10.8908                           |                      |                            |
| OK       | m/z               | Charge                 | Peak mW                                                                 | Peptide mW | Delta (Da) | Delta (ppm)  | Ladder Score    | Log Likelihood | Start        | End        | Sequence                               | Retention Time (min)              | Query Tool           |                            |
|          | 618.3115          | 2                      | 2                                                                       | 1234.6074  | 1234.5941  | 0.01331      | 10.7736         | 33.3333        | 10.0572      | 500        | 510 (K)DQVANSAFVFER(L)                 | 20.37                             | PLGS Databank Search |                            |
|          | 708.8282          | 2                      | 2                                                                       | 1415.6407  | 1415.6302  | 0.0105       | 7.41581         | 60.8696        | 19.8509      | 547        | 558 (K)EGLLELPEDEEEK(K)                | 22.72                             | PLGS Databank Search |                            |
| OK       | m/z               | Charge                 | Peak mW                                                                 | Peptide mW | Delta (Da) | Delta (ppm)  | Ladder Score    | Log Likelihood | Start        | End        | Sequence                               | Retention Time (min)              | Query Tool           |                            |
|          | 597.836           | 2                      | 2                                                                       | 1193.6564  | 1193.6403  | 0.01611      | 13.4928         | 49.1228        | 22.5112      | 73         | 82 (K)DIHPNQER(T)                      | 24.25                             | PLGS Databank Search |                            |
|          | 708.8282          | 2                      | 2                                                                       | 1415.6407  | 1415.6302  | 0.0105       | 7.41581         | 60.8696        | 19.8509      | 412        | 423 (K)EGLLELPEDEEEK(K)                | 22.72                             | PLGS Databank Search |                            |
| SSP 5304 |                   |                        |                                                                         |            |            |              |                 |                |              |            |                                        |                                   |                      |                            |
| OK       | Accession         | Entry                  | Description                                                             | mW (Da)    | pI (pH)    | PLGS Score   | Probability (%) | Peptides       | Coverage (%) | Mean Error | RMS Error                              | Modified (%)                      | Missed Cleavages (%) |                            |
|          | 2 F-actin-capping | sp P52907 CAZA1_HUMAN  | protein subunit alpha 1 OS Homo sapiens GN CAPZA1 PE 1 SV 3             | 32902      | 5.3258     | 9.8357       | 100             | 1              | 2.7972       | 5.0189     |                                        | 5.0189                            | 100                  |                            |
| OK       | m/z               | Charge                 | Peak mW                                                                 | Peptide mW | Delta (Da) | Delta (ppm)  | Ladder Score    | Log Likelihood | Start        | End        | Sequence                               | Modifications                     | Retention Time (min) | Query Tool                 |
|          | 469.2087          | 2                      | 2                                                                       | 936.4018   | 936.3971   | 0.004699707  | 5.018925        | 33.3333        | 93.5765      | 122        | 129 (R)ECSDSLRLA(A)                    | Carbamidomethyl C (3)             |                      | 15.54 PLGS Databank Search |
| SSP 5322 |                   |                        |                                                                         |            |            |              |                 |                |              |            |                                        |                                   |                      |                            |
| OK       | Accession         | Entry                  | Description                                                             | mW (Da)    | pI (pH)    | PLGS Score   | Probability (%) | Peptides       | Coverage (%) | Mean Error | RMS Error                              | Modified (%)                      | Missed Cleavages (%) |                            |
|          | 2 60S             | sp P05388 RLA0_HUMAN   | acidic ribosomal protein P0 OS Homo sapiens GN RPLP0 PE 1 SV 1          | 34251      | 5.6049     | 9.8355       | 99.99           | 8              | 32.4921      | 9.4361     |                                        | 12.3615                           | 37.5                 |                            |
| OK       | m/z               | Charge                 | Peak mW                                                                 | Peptide mW | Delta (Da) | Delta (ppm)  | Ladder Score    | Log Likelihood | Start        | End        | Sequence                               | Modifications                     | Retention Time (min) | Query Tool                 |
|          | 609.3349          | 2                      | 2                                                                       | 1216.6542  | 1216.6702  | -0.01599     | -13.14342       | 57.8947        | 82.7807      | 17         | 26 (K)IILLDDYPK(C)                     |                                   | 27.24                | PLGS Databank Search       |
|          | 633.8206          | 2                      | 2                                                                       | 1265.6256  | 1265.6074  | 0.01819      | 14.37134        | 71.0145        | 63.9052      | 27         | 38 (K)CFIVGADNVGSK(Q)                  | Carbamidomethyl C (1)             | 24.22                | PLGS Databank Search       |
|          | 633.8161          | 2                      | 2                                                                       | 1265.6166  | 1265.6074  | 0.00916      | 7.2339          | 39.1304        | 33.814       | 27         | 38 (K)CFIVGADNVGSK(Q)                  | Carbamidomethyl C (1)             | 22.91                | PLGS Databank Search       |
|          | 633.8053          | 2                      | 2                                                                       | 1265.595   | 1265.6074  | -0.01245     | -9.8381         | 73.913         | 200.7681     | 27         | 38 (K)CFIVGADNVGSK(Q)                  | Carbamidomethyl C (1)             | 22.71                | PLGS Databank Search       |
|          | 484.765           | 2                      | 2                                                                       | 967.5144   | 967.5127   | 0.00171      | 1.76637         | 76.4706        | 177.7671     | 84         | 92 (K)GNVGFVTK(E)                      |                                   | 25.05                | PLGS Databank Search       |
|          | 438.2291          | 2                      | 2                                                                       | 874.44257  | 874.4396   | 0.00299      | 3.42016         | 69.2308        | 60.6649      | 93         | 99 (K)EDLTEIR(D)                       |                                   | 20.48                | PLGS Databank Search       |
|          | 727.3734          | 3                      | 3                                                                       | 2179.0967  | 2179.0945  | 0.0022       | 1.00834         | 56.5891        | 230.7153     | 113        | 134 (R)AGAIAPCEVTPAQTGLGPEK(T)         | Carbamidomethyl C (7)             | 23.76                | PLGS Databank Search       |
|          | 657.3662          | 2                      | 2                                                                       | 1312.7168  | 1312.7028  | 0.01404      | 10.69403        | 76.8116        | 229.4973     | 135        | 146 (K)TSFFQALGITT(K)                  |                                   | 30.69                | PLGS Databank Search       |
|          | 657.3591          | 2                      | 2                                                                       | 1312.7025  | 1312.7028  | 0            | -0.18598        | 43.4783        | -4.5313      | 135        | 146 (K)TSFFQALGITT(K)                  |                                   | 30.81                | PLGS Databank Search       |
|          | 657.8704          | 2                      | 2                                                                       | 1313.7252  | 1313.6868  | 0.03845      | 29.27041        | 53.6232        | 166.3408     | 135        | 146 (K)TSFFQALGITT(K)                  | Deamidation Q (5)                 | 30.69                | PLGS Databank Search       |
|          | 918.1728          | 3                      | 3                                                                       | 2751.4949  | 2751.4959  | 0.0354       | 12.86604        | 38.7978        | -0.0574      | 267        | 297 (K)AFLADPSAFVAAPVAATAAPAAAAAPAK(V) |                                   | 29.89                | PLGS Databank Search       |
| SSP 8101 |                   |                        |                                                                         |            |            |              |                 |                |              |            |                                        |                                   |                      |                            |
| OK       | Accession         | Entry                  | Description                                                             | mW (Da)    | pI (pH)    | PLGS Score   | Probability (%) | Peptides       | Coverage (%) | Mean Error | RMS Error                              | Modified (%)                      | Missed Cleavages (%) |                            |
|          | 2 Protein         | sp Q99497 PARK7_HUMAN  | DJ 1 OS Homo sapiens GN PARK7 PE 1 SV 2                                 | 19878      | 6.3717     | 9.8357       | 100             | 5              | 19.5767      | 17.0567    |                                        | 19.3274                           | 60                   |                            |
| OK       | m/z               | Charge                 | Peak mW                                                                 | Peptide mW | Delta (Da) | Delta (ppm)  | Ladder Score    | Log Likelihood | Start        | End        | Sequence                               | Modifications                     | Retention Time (min) | Query Tool                 |
|          | 838.4333          | 2                      | 2                                                                       | 1674.851   | 1674.7955  | 0.05542      | 33.09056        | 50.5747        | 52.0468      | 13         | 27 (K)GAEMETVIPDVMR(R)                 |                                   | 28.28                | PLGS Databank Search       |
|          | 846.4155          | 2                      | 2                                                                       | 1690.8154  | 1690.7905  | 0.0249       | 14.72823        | 36.7816        | 17.7256      | 13         | 27 (K)GAEMETVIPDVMR(R)                 | Oxidation M (14)                  | 25.92                | PLGS Databank Search       |
|          | 854.4175          | 2                      | 2                                                                       | 1706.8193  | 1706.7854  | 0.03394      | 19.88273        | 31.0345        | 33.8745      | 13         | 27 (K)GAEMETVIPDVMR(R)                 | Oxidation M (5), Oxidation M (14) | 23.8                 | PLGS Databank Search       |
|          | 766.3777          | 2                      | 2                                                                       | 1530.7397  | 1530.7236  | 0.01611      | 10.52658        | 44.4444        | 0.0921       | 49         | 62 (R)DVVICPDASLEDK(K)                 | Carbamidomethyl C (5)             | 24.05                | PLGS Databank Search       |
|          | 437.7569          | 2                      | 2                                                                       | 873.49817  | 873.492    | 0.00616      | 7.05736         | 68.8889        | 42.3717      | 149        | 156 (K)DGLLTSR(G)                      |                                   | 23.14                | PLGS Databank Search       |
| SSP 1222 |                   |                        |                                                                         |            |            |              |                 |                |              |            |                                        |                                   |                      |                            |
| OK       | Accession         | Entry                  | Description                                                             | mW (Da)    | pI (pH)    | PLGS Score   | Probability (%) | Peptides       | Coverage (%) | Mean Error | RMS Error                              | Modified (%)                      | Missed Cleavages (%) |                            |
|          | 2 Heat            | sp P08107 HSP71_HUMAN  | shock 70 kDa protein 1 OS Homo sapiens GN HSPA1A PE 1 SV 5              | 70009      | 5.3187     | 9.8352       | 99.96           | 2              | 2.4961       | 9.2219     |                                        | 9.2255                            |                      |                            |
| OK       | m/z               | Charge                 | Peak mW                                                                 | Peptide mW | Delta (Da) | Delta (ppm)  | Ladder Score    | Log Likelihood | Start        | End        | Sequence                               | Retention Time (min)              | Query Tool           |                            |
|          | 402.7236          | 2                      | 2                                                                       | 803.4316   | 803.4388   | -0.007202148 | -8.964153       | 64.1026        | 91.857       | 501        | 507 (K)ITTTNDK(G)                      |                                   | 16.91                | PLGS Databank Search       |
|          | 474.2427          | 2                      | 2                                                                       | 946.4698   | 946.4608   | 0.008972168  | 9.479703        | 78.4314        | 100.3472     | 551        | 559 (K)SVEDEGLK(G)                     |                                   | 17.2                 | PLGS Databank Search       |
| SSP 1313 |                   |                        |                                                                         |            |            |              |                 |                |              |            |                                        |                                   |                      |                            |
| OK       | Accession         | Entry                  | Description                                                             | mW (Da)    | pI (pH)    | PLGS Score   | Probability (%) | Peptides       | Coverage (%) | Mean Error | RMS Error                              | Modified (%)                      | Missed Cleavages (%) |                            |
|          | 2 Actin,          | sp P60709 ACTB_HUMAN   | cytoplasmic 1 OS Homo sapiens GN ACTB PE 1 SV 1                         | 41709      | 5.142      | 9.1424       | 50              | 5              | 15.2         | 2.755      |                                        | 3.2615                            |                      |                            |
| OK       | m/z               | Charge                 | Peak mW                                                                 | Peptide mW | Delta (Da) | Delta (ppm)  | Ladder Score    | Log Likelihood | Start        | End        | Sequence                               | Retention Time (min)              | Query Tool           |                            |
|          | 488.7295          | 2                      | 2                                                                       | 975.44336  | 975.441    | 0.002380371  | 2.4403026       | 50.8772        | 53.302       | 19         | 28 (K)AGFAGDDAPR(A)                    |                                   | 17.72                | PLGS Databank Search       |
|          | 599.766           | 2                      | 2                                                                       | 1197.5164  | 1197.5149  | 0.001464844  | 1.2232363       | 52.381         | 90.9453      | 51         | 61 (K)DSYVGDDEAGSK(R)                  |                                   | 16.34                | PLGS Databank Search       |
|          | 652.0263          | 3                      | 3                                                                       | 1953.0554  | 1953.0571  | -0.001708984 | -0.8750304      | 49.5238        | 88.4173      | 96         | 113 (R)VAPEEHPVLLTEAPLNPK(A)           |                                   | 24.54                | PLGS Databank Search       |
|          | 498.7504          | 2                      | 2                                                                       | 997.48517  | 997.4791   | 0.006042481  | 6.057751        | 33.3333        | 42.5124      | 184        | 191 (R)DLTLYMK(I)                      |                                   | 27.05                | PLGS Databank Search       |
|          | 566.7697          | 2                      | 2                                                                       | 1131.8238  | 1131.5195  | 0.004272461  | 3.7758615       | 29.8246        | 19.5496      | 197        | 206 (R)GYSFTTAE(R)                     |                                   | 20.45                | PLGS Databank Search       |
|          | 566.7688          | 2                      | 2                                                                       | 1131.522   | 1131.5195  | 0.002441406  | 2.157635        | 57.8947        | 123.0299     | 197        | 206 (R)GYSFTTAE(R)                     |                                   | 20.2                 | PLGS Databank Search       |

| SSP 1342                                                                             |           |          |                          |            |            |              |                 |                |              |            |                               |                        |                      |                      |
|--------------------------------------------------------------------------------------|-----------|----------|--------------------------|------------|------------|--------------|-----------------|----------------|--------------|------------|-------------------------------|------------------------|----------------------|----------------------|
| OK                                                                                   | Accession | Entry    | Description              | mW (Da)    | pI (pH)    | PLGS Score   | Probability (%) | Peptides       | Coverage (%) | Mean Error | RMS Error                     | Modified (%)           | Missed Cleavages (%) |                      |
|                                                                                      | 2         | Keratin, | sp P08729 K2C7_HUMAN     | 51386      | 5.311      | 9.8356       | 100             | 5              | 11.9403      | 5.3699     | 5.5967                        |                        |                      |                      |
| Description: type II cytoskeletal 7 OS Homo sapiens GN KRT7 PE 1 SV 3                |           |          |                          |            |            |              |                 |                |              |            |                               |                        |                      |                      |
| OK                                                                                   | m/z       | Charge   | Peak mW                  | Peptide mW | Delta (Da) | Delta (ppm)  | Ladder Score    | Log Likelihood | Start        | End        | Sequence                      | Retention Time (min)   | Query Tool           |                      |
|                                                                                      | 2         | 721.907  | 2                        | 1441.7983  | 1441.793   | 0.005371094  | 3.725288        | 61.3333        | 53.0113      | 137        | 149 (R)LPDIFEAQIAGLR(G)       | 30.61                  | PLGS Databank Search |                      |
|                                                                                      | 2         | 610.8341 | 2                        | 1219.6526  | 1219.6448  | 0.0078125    | 6.4055533       | 68.254         | 64.4997      | 188        | 198 (R)TAENEFVLK(K)           | 24.7                   | PLGS Databank Search |                      |
|                                                                                      | 2         | 709.8701 | 2                        | 1417.7246  | 1417.72    | 0.004638672  | 3.271924        | 65.2174        | 54.1568      | 215        | 226 (K)VDALNDEINFLR(T)        | 28.39                  | PLGS Databank Search |                      |
|                                                                                      | 2         | 546.7923 | 2                        | 1091.569   | 1091.561   | 0.00793457   | 7.2690125       | 56.1404        | 40.2093      | 287        | 296 (K)FETLQAAQAG(H)          | 19.27                  | PLGS Databank Search |                      |
|                                                                                      | 2         | 593.8109 | 2                        | 1185.6062  | 1185.5989  | 0.007324219  | 6.1776533       | 50.8772        | 24.4728      | 354        | 363 (K)QEELEALQRI(A)          | 22.02                  | PLGS Databank Search |                      |
| SSP 2509                                                                             |           |          |                          |            |            |              |                 |                |              |            |                               |                        |                      |                      |
| OK                                                                                   | Accession | Entry    | Description              | mW (Da)    | pI (pH)    | PLGS Score   | Probability (%) | Peptides       | Coverage (%) | Mean Error | RMS Error                     | Modified (%)           | Missed Cleavages (%) |                      |
|                                                                                      | 2         |          | 60 sp P10809 CH60_HUMAN  | 61016      | 5.5503     | 9.8357       | 100             | 4              | 8.9005       | 3.6777     | 4.0263                        |                        | 25                   |                      |
| Description: kDa heat shock protein mitochondrial OS Homo sapiens GN HSPD1 PE 1 SV 2 |           |          |                          |            |            |              |                 |                |              |            |                               |                        |                      |                      |
| OK                                                                                   | m/z       | Charge   | Peak mW                  | Peptide mW | Delta (Da) | Delta (ppm)  | Ladder Score    | Log Likelihood | Start        | End        | Sequence                      | Modifications          | Retention Time (min) | Query Tool           |
|                                                                                      | 2         | 752.8868 | 2                        | 1503.7579  | 1503.749   | 0.008911133  | 5.9259443       | 53.3333        | 74.5803      | 206        | 218 (K)TLNDELEIEIGMK(F)       |                        | 29.35                | PLGS Databank Search |
|                                                                                      | 2         | 617.3032 | 2                        | 1232.5908  | 1232.5884  | 0.002441406  | 1.980715        | 72.4638        | 75.5546      | 406        | 417 (K)VGGSDEVVEVNEK(K)       |                        | 16.91                | PLGS Databank Search |
|                                                                                      | 2         | 480.7607 | 2                        | 959.5058   | 959.5036   | 0.002197266  | 2.2900023       | 72.549         | 115.3987     | 421        | 429 (R)VDALNATRI(A)           |                        | 17.69                | PLGS Databank Search |
|                                                                                      | 2         | 842.9591 | 2                        | 1683.9026  | 1683.8978  | 0.004760742  | 2.8272157       | 44.4444        | 114.1761     | 430        | 446 (R)AAVEEGIVLGGGCALLR(C)   | Carbamidomethyl C (13) | 27.9                 | PLGS Databank Search |
|                                                                                      | 2         | 562.3041 | 3                        | 1683.8888  | 1683.8978  | -0.009033203 | -5.3644605      | 36.3636        | 26.6871      | 430        | 446 (R)AAVEEGIVLGGGCALLR(C)   | Carbamidomethyl C (13) | 27.9                 | PLGS Databank Search |
| SSP 3301                                                                             |           |          |                          |            |            |              |                 |                |              |            |                               |                        |                      |                      |
| OK                                                                                   | Accession | Entry    | Description              | mW (Da)    | pI (pH)    | PLGS Score   | Probability (%) | Peptides       | Coverage (%) | Mean Error | RMS Error                     | Modified (%)           | Missed Cleavages (%) |                      |
|                                                                                      | 2         | ATP      | sp P06576 ATPB_HUMAN     | 56524      | 5.0955     | 9.8357       | 100             | 4              | 10.586       | 6.1849     | 9.321                         |                        | 25                   |                      |
| Description: synthase subunit beta mitochondrial OS Homo sapiens GN ATP5B PE 1 SV 3  |           |          |                          |            |            |              |                 |                |              |            |                               |                        |                      |                      |
| OK                                                                                   | m/z       | Charge   | Peak mW                  | Peptide mW | Delta (Da) | Delta (ppm)  | Ladder Score    | Log Likelihood | Start        | End        | Sequence                      | Modifications          | Retention Time (min) | Query Tool           |
|                                                                                      | 2         | 519.7918 | 2                        | 1037.568   | 1037.569   | -0.019920898 | -18.235483      | 59.6491        | 107.1699     | 134        | 143 (K)IPVGPETLGR(I)          |                        | 22.03                | PLGS Databank Search |
|                                                                                      | 2         | 737.4204 | 2                        | 1472.8252  | 1472.8273  | -0.002075195 | -1.4089876      | 58.6667        | 23.8625      | 213        | 225 (K)YLVIELNNVAK(K)         | Oxidation M (5)        | 31.36                | PLGS Databank Search |
|                                                                                      | 2         | 718.3793 | 2                        | 1434.7429  | 1434.7467  | -0.00378418  | -2.6375246      | 60.4938        | 61.0572      | 311        | 324 (R)FQTAGSEVALLGR(I)       |                        | 26.64                | PLGS Databank Search |
|                                                                                      | 2         | 994.5184 | 2                        | 1987.0211  | 1987.026   | -0.004882813 | -2.4573472      | 53.1532        | 67.9976      | 388        | 406 (R)AIAELGYTPAVDPLDISTR(I) |                        | 29.25                | PLGS Databank Search |
| SSP 3806                                                                             |           |          |                          |            |            |              |                 |                |              |            |                               |                        |                      |                      |
| OK                                                                                   | Accession | Entry    | Description              | mW (Da)    | pI (pH)    | PLGS Score   | Probability (%) | Peptides       | Coverage (%) | Mean Error | RMS Error                     | Modified (%)           | Missed Cleavages (%) |                      |
|                                                                                      | 2         |          | 78 sp P11021 GRP78_HUMAN | 72288      | 4.8748     | 9.8356       | 100             | 5              | 9.0214       | 1.5216     | 1.9284                        |                        | 20                   |                      |
| Description: kDa glucose regulated protein OS Homo sapiens GN HSPA5 PE 1 SV 2        |           |          |                          |            |            |              |                 |                |              |            |                               |                        |                      |                      |
| OK                                                                                   | m/z       | Charge   | Peak mW                  | Peptide mW | Delta (Da) | Delta (ppm)  | Ladder Score    | Log Likelihood | Start        | End        | Sequence                      | Modifications          | Retention Time (min) | Query Tool           |
|                                                                                      | 2         | 715.85   | 2                        | 1429.6943  | 1429.6938  | 4.89E-04     | 0.3415992       | 46.3768        | 25.3887      | 102        | 113 (R)WNPSPVQQDIK(F)         |                        | 21.78                | PLGS Databank Search |
|                                                                                      | 2         | 768.9054 | 2                        | 1535.7952  | 1535.7905  | 0.004638672  | 3.0203605       | 60.4938        | 79.9421      | 139        | 152 (K)TFARPEEISAMVLT(KM)     |                        | 29.67                | PLGS Databank Search |
|                                                                                      | 2         | 665.3112 | 2                        | 1328.6068  | 1328.6069  | -1.22E-04    | -0.09187843     | 66.6667        | 45.4201      | 327        | 336 (K)FEELNMLFR(S)           | Oxidation M (6)        | 26.85                | PLGS Databank Search |
|                                                                                      | 2         | 730.8856 | 2                        | 1459.7556  | 1459.7517  | 0.00390625   | 2.6759686       | 62.963         | 139.0804     | 354        | 367 (K)FDEIVLVGSTR(I)         |                        | 26.4                 | PLGS Databank Search |
|                                                                                      | 2         | 537.7818 | 2                        | 1073.548   | 1073.5464  | 0.001586914  | 1.4781979       | 66.6667        | 147.1207     | 524        | 532 (K)ITTDGNLR(L)            |                        | 17.28                | PLGS Databank Search |
| SSP 4315                                                                             |           |          |                          |            |            |              |                 |                |              |            |                               |                        |                      |                      |
| OK                                                                                   | Accession | Entry    | Description              | mW (Da)    | pI (pH)    | PLGS Score   | Probability (%) | Peptides       | Coverage (%) | Mean Error | RMS Error                     | Modified (%)           | Missed Cleavages (%) |                      |
|                                                                                      | 2         | Protein  | sp Q15084 PDIA6_HUMAN    | 48091      | 4.7615     | 9.8356       | 100             | 3              | 8.4091       | 3.4036     | 4.8502                        |                        |                      |                      |
| Description: disulfide isomerase A6 OS Homo sapiens GN PDIA6 PE 1 SV 1               |           |          |                          |            |            |              |                 |                |              |            |                               |                        |                      |                      |
| OK                                                                                   | m/z       | Charge   | Peak mW                  | Peptide mW | Delta (Da) | Delta (ppm)  | Ladder Score    | Log Likelihood | Start        | End        | Sequence                      | Retention Time (min)   | Query Tool           |                      |
|                                                                                      | 2         | 693.8848 | 2                        | 1385.754   | 1385.7513  | 0.002685547  | 1.3379718       | 66.6667        | 181.5525     | 119        | 132 (R)TGEAIVDAALSALR(Q)      |                        | 31.29                | PLGS Databank Search |
|                                                                                      | 2         | 693.8841 | 2                        | 1385.7526  | 1385.7513  | 0.001220703  | 0.8808962       | 54.321         | 75.4092      | 119        | 132 (R)TGEAIVDAALSALR(Q)      |                        | 31.41                | PLGS Databank Search |
|                                                                                      | 2         | 698.8281 | 2                        | 1395.6406  | 1395.6405  | 1.22E-04     | 0.08746544      | 56.5217        | 62.7468      | 161        | 172 (K)IDVLDLDSFDK(N)         |                        | 26.2                 | PLGS Databank Search |
|                                                                                      | 2         | 576.2579 | 2                        | 1150.5001  | 1150.489   | 0.011108398  | 9.655372        | 60.3175        | 121.3447     | 246        | 256 (K)GESVVDYDGGRT(T)        |                        | 18.14                | PLGS Databank Search |
|                                                                                      | 2         | 576.2549 | 2                        | 1150.4941  | 1150.489   | 0.005126953  | 4.4563255       | 55.5556        | 45.7493      | 246        | 256 (K)GESVVDYDGGRT(T)        |                        | 18.26                | PLGS Databank Search |
| SSP 5104                                                                             |           |          |                          |            |            |              |                 |                |              |            |                               |                        |                      |                      |
| OK                                                                                   | Accession | Entry    | Description              | mW (Da)    | pI (pH)    | PLGS Score   | Probability (%) | Peptides       | Coverage (%) | Mean Error | RMS Error                     | Modified (%)           | Missed Cleavages (%) |                      |
|                                                                                      | 2         | Actin,   | sp P06709 ACTB_HUMAN     | 41709      | 5.142      | 9.1425       | 50              | 11             | 25.0667      | 15.9678    | 26.2064                       |                        | 18.1818              | 6                    |
| Description: cytoplasmic 1 OS Homo sapiens GN ACTB PE 1 SV 1                         |           |          |                          |            |            |              |                 |                |              |            |                               |                        |                      |                      |
| OK                                                                                   | m/z       | Charge   | Peak mW                  | Peptide mW | Delta (Da) | Delta (ppm)  | Ladder Score    | Log Likelihood | Start        | End        | Sequence                      | Modifications          | Retention Time (min) | Query Tool           |
|                                                                                      | 2         | 488.7314 | 2                        | 975.4472   | 975.441    | 0.00623      | 6.38233         | 47.3684        | 25.8068      | 19         | 28 (K)AGFAGDADAPR(A)          |                        | 18.28                | PLGS Databank Search |
|                                                                                      | 2         | 599.7677 | 2                        | 1197.5198  | 1197.5149  | 0.00488      | 4.07745         | 76.1905        | 68.5301      | 51         | 61 (K)DYSYVGEAAGSK(R)         |                        | 17.11                | PLGS Databank Search |
|                                                                                      | 2         | 499.7475 | 2                        | 997.4794   | 997.4791   | 0            | 0.24476         | 77.7778        | 163.9015     | 184        | 191 (R)DLTDVLMK(I)            |                        | 27.29                | PLGS Databank Search |
|                                                                                      | 2         | 499.7472 | 2                        | 997.47876  | 997.4791   | 0            | -0.36714        | 55.5556        | 28.1325      | 184        | 191 (R)DLTDVLMK(I)            |                        | 27.49                | PLGS Databank Search |
|                                                                                      | 2         | 507.7375 | 2                        | 1013.45935 | 1013.4739  | -0.01453     | -14.33324       | 64.4444        | 110.3209     | 184        | 191 (R)DLTDVLMK(I)            | Oxidation M (7)        | 24.83                | PLGS Databank Search |
|                                                                                      | 2         | 566.7739 | 2                        | 1131.5322  | 1131.5195  | 0.01227      | 11.2197         | 42.1053        | 21.6452      | 197        | 206 (R)GYSFTTAE(R)            |                        | 19.7                 | PLGS Databank Search |
|                                                                                      | 2         | 566.7672 | 2                        | 1131.5188  | 1131.5195  | -0.001       | -0.64729        | 68.4211        | 55.6962      | 197        | 206 (R)GYSFTTAE(R)            |                        | 20.83                | PLGS Databank Search |
|                                                                                      | 2         | 566.7262 | 2                        | 1131.4368  | 1131.5195  | -0.08276     | -73.14383       | 70.1754        | 244.1406     | 197        | 206 (R)GYSFTTAE(R)            |                        | 20.6                 | PLGS Databank Search |
|                                                                                      | 2         | 895.9587 | 2                        | 1789.9017  | 1789.8846  | 0.01709      | 9.54801         | 56.9892        | 40.2347      | 239        | 254 (K)SYLVDPDGVITIGNER(F)    |                        | 27.12                | PLGS Databank Search |
|                                                                                      | 2         | 389.1848 | 2                        | 776.354    | 776.34875  | 0.00525      | 6.76117         | 75.7576        | 111.1564     | 285        | 290 (K)CDVDIR(K)              | Carbamidomethyl C (1)  | 17.97                | PLGS Databank Search |
|                                                                                      | 2         | 581.3212 | 2                        | 1160.6268  | 1160.6111  | 0.01575      | 13.56791        | 76.1905        | 234.7007     | 316        | 326 (K)EITALPSTMK(I)          |                        | 22.5                 | PLGS Databank Search |
|                                                                                      | 2         | 581.2773 | 2                        | 1160.539   | 1160.6111  | -0.07214     | -62.15998       | 73.0159        | 207.1623     | 316        | 326 (K)EITALPSTMK(I)          |                        | 22.67                | PLGS Databank Search |
|                                                                                      | 2         | 518.8332 | 2                        | 1035.6508  | 1035.6439  | 0.00684      | 6.60066         | 19.6078        | -8.6127      | 327        | 335 (K)KIAPPER(K)             |                        | 24.53                | PLGS Databank Search |
|                                                                                      | 2         | 398.2333 | 2                        | 794.451    | 794.465    | -0.01404     | -17.66996       | 61.5385        | 116.008      | 329        | 335 (K)IAPPER(K)              |                        | 18.82                | PLGS Databank Search |
|                                                                                      | 2         | 758.8572 | 2                        | 1515.6987  | 1515.6953  | 0.00342      | 2.25505         | 42.6667        | 41.368       | 360        | 372 (K)QYDESGPSIVHR(K)        |                        | 19.24                | PLGS Databank Search |
|                                                                                      | 2         | 506.2262 | 3                        | 1515.6552  | 1515.6953  | -0.04016     | -26.49684       | 77.3333        | 106.7073     | 360        | 372 (K)QYDESGPSIVHR(K)        |                        | 19.24                | PLGS Databank Search |
| SSP 5230                                                                             |           |          |                          |            |            |              |                 |                |              |            |                               |                        |                      |                      |
| OK                                                                                   | Accession | Entry    | Description              | mW (Da)    | pI (pH)    | PLGS Score   | Probability (%) | Peptides       | Coverage (%) | Mean Error | RMS Error                     | Modified (%)           | Missed Cleavages (%) |                      |
|                                                                                      | 2         | Annexin  | sp P07355 ANXA2_HUMAN    | 38579      | 7.784      | 9.1424       | 50              | 2              | 6.1947       | 2.5099     | 2.9833                        |                        |                      |                      |
| Description: A2 OS Homo sapiens GN ANXA2 PE 1 SV 2                                   |           |          |                          |            |            |              |                 |                |              |            |                               |                        |                      |                      |
| OK                                                                                   | m/z       | Charge   | Peak mW                  | Peptide mW | Delta (Da) | Delta (ppm)  | Ladder Score    | Log Likelihood | Start        | End        | Sequence                      | Retention Time (min)   | Query Tool           |                      |
|                                                                                      | 2         | 457.7685 | 2                        | 913.52136  | 913.5233   | -0.001953125 | -2.1380134      | 56.8627        | 155.932      | 75         | 83 (R)NVPIVTSK(D)             |                        | 19.44                | PLGS Databank Search |
|                                                                                      | 2         | 722.835  | 2                        | 1443.6544  | 1443.6517  | 0.002685547  | 1.8602457       | 59.4203        | 37.4272      | 106        | 117 (R)FTSGEDYDER(V)          |                        | 23.87                | PLGS Databank Search |
|                                                                                      | 2         | 531.7589 | 2                        | 1061.8022  | 1061.4989  | 0.003295898  | 3.1049476       | 64.7059        | 151.4019     | 149        | 157 (R)QVSDDLTER(A)           |                        | 18.12                | PLGS Databank Search |

SSP 6113

| OK | Accession | Entry                 | Description                                             | mW (Da)    | pI (pH)    | PLGS Score   | Probability (%) | Peptides       | Coverage (%) | Mean Error | RMS Error                  |                      |                      |
|----|-----------|-----------------------|---------------------------------------------------------|------------|------------|--------------|-----------------|----------------|--------------|------------|----------------------------|----------------------|----------------------|
|    | 2 Heat    | sp P04792 HSPB1_HUMAN | shock protein beta 1 OS Homo sapiens GN HSPB1 PE 1 SV 2 | 22768      | 5.9588     | 9.8356       | 100             | 3              | 17.0732      | 2.9634     |                            | 4.0497               |                      |
| OK | m/z       | Charge                | Peak mW                                                 | Peptide mW | Delta (Da) | Delta (ppm)  | Ladder Score    | Log Likelihood | Start        | End        | Sequence                   | Retention Time (min) | Query Tool           |
|    | 2         | 582.319               | 2                                                       | 1162.6223  | 1162.6134  | 0.008911133  | 7.664743        | 73.6842        | 146.0217     | 28         | 37 (R)LFDDQAFGLPR(L)       | 27.7                 | PLGS Databank Search |
|    | 2         | 582.3154              | 2                                                       | 1162.6152  | 1162.6134  | 0.001831055  | 1.5749472       | 71.9298        | 80.0376      | 28         | 37 (R)LFDDQAFGLPR(L)       | 27.8                 | PLGS Databank Search |
|    | 2         | 595.3125              | 3                                                       | 1782.9141  | 1782.9152  | -0.001098633 | -0.61620027     | 61.2903        | 22.4163      | 97         | 112 (R)VSLDYNHFAPDELTVK(T) | 26.1                 | PLGS Databank Search |
|    | 2         | 459.252               | 2                                                       | 916.4884   | 916.4866   | 0.001831055  | 1.9979068       | 70.5882        | 114.4933     | 115        | 123 (K)DGVVEITGK(H)        | 20.08                | PLGS Databank Search |

SSP 7123

| OK | Accession | Entry                | Description                                                       | mW (Da)    | pI (pH)    | PLGS Score   | Probability (%) | Peptides       | Coverage (%) | Mean Error | RMS Error           |                      |                      |
|----|-----------|----------------------|-------------------------------------------------------------------|------------|------------|--------------|-----------------|----------------|--------------|------------|---------------------|----------------------|----------------------|
|    | 2 Growth  | sp P62993 GRB2_HUMAN | factor receptor bound protein 2 OS Homo sapiens GN GRB2 PE 1 SV 1 | 25190      | 5.857      | 9.8357       | 100             | 2              | 7.8341       | 5.5098     |                     | 5.6555               |                      |
| OK | m/z       | Charge               | Peak mW                                                           | Peptide mW | Delta (Da) | Delta (ppm)  | Ladder Score    | Log Likelihood | Start        | End        | Sequence            | Retention Time (min) | Query Tool           |
|    | 2         | 548.7643             | 2                                                                 | 1095.513   | 1095.5083  | 0.004638672  | 4.2342644       | 42.1053        | 21.504       | 11         | 20 (K)ATADDELSFK(R) | 21.9                 | PLGS Databank Search |
|    | 2         | 459.7588             | 2                                                                 | 917.50195  | 917.5082   | -0.006225586 | -6.7853193      | 64.1026        | 58.5613      | 143        | 149 (R)NQIFLR(D)    | 22.07                | PLGS Databank Search |
