# Supplementary material
Source: PubMed Central journal article supplement (PMC11115173)
Supplement: 18_2011_752_MOESM13_ESM.pdf [file 18_2011_752_MOESM13_ESM.pdf]

# **Protein-Profiling of Genomic Instability in Endometrial Cancer**

Timo Gemoll<sup>1,2,3</sup>, Jens K. Habermann<sup>1,2</sup>, Johanna Lahmann<sup>2</sup>,  
Silke Szymczak<sup>4</sup>, Caroline Lundgren<sup>5</sup>, Nana K. Bündgen<sup>2</sup>, Thomas  
Jungbluth<sup>2</sup>, Britta Nordström<sup>5</sup>, Susanne Becker<sup>3</sup>, Marta I. Lomnytska<sup>3,5</sup>,  
Hans-Peter Bruch<sup>2</sup>, Andreas Ziegler<sup>4</sup>, Ulf Hellman<sup>6</sup>, Gert Auer<sup>3</sup>, Uwe J.  
Roblick<sup>1,2</sup>, and Hans Jörnvall<sup>1</sup>

(1) Department of Medical Biochemistry and Biophysics, Karolinska Institutet, SE-17177 Stockholm, Sweden

(2) Department of Surgery, University of Lübeck, D-23538 Lübeck, Germany

(3) Karolinska Biomic Center, Karolinska Institutet, SE-17176 Stockholm, Sweden

(4) Institute of Medical Biometry and Statistics, University of Lübeck, D-23562 Lübeck, Germany

(5) Department of Oncology, Radiumhemmet, Karolinska University Hospital, SE-17176 Stockholm, Sweden

(6) Ludwig Institute for Cancer Research, Ltd., SE-75124 Uppsala, Sweden

Address for correspondence:

Professor Hans Jörnvall, MD  
Department of Medical Biochemistry and Biophysics  
Scheeles väg 2  
Karolinska Institutet  
SE-17177 Stockholm, Sweden  
Phone: +46-8-524 877 02  
Fax: +46-8-33 74 62  
Mail: [Hans.Jornvall@ki.se](mailto:Hans.Jornvall@ki.se)

&

Jens K. Habermann, M.D., Ph.D.  
Laboratory for Surgical Research, Dept. of Surgery  
University Clinic Schleswig-Holstein, Campus Lübeck  
Ratzeburger Allee 160  
D-23538 Lübeck, Germany  
Phone: +49-451-5002676  
Fax: +49-451-5002069  
Mailto: [Jens.Habermann@gmail.com](mailto:Jens.Habermann@gmail.com)

| SSP  | Gene symbol | Normal endometrium [mean] | Diploid endometrioid [mean] | Aneuploid endometrioid [mean] | Aneuploid UPSC [mean] | Normal endometrium [standard deviation] | Diploid endometrioid [standard deviation] | Aneuploid endometrioid [standard deviation] | Aneuploid upsc [standard deviation] |
|------|-------------|---------------------------|-----------------------------|-------------------------------|-----------------------|-----------------------------------------|-------------------------------------------|---------------------------------------------|-------------------------------------|
| 210  | KRT10       | 10.69491798               | 8.930775467                 | 8.352501305                   | 7.653597806           | 0.496096775                             | 1.481574259                               | 0.354602419                                 | 0.599118889                         |
| 215  | YWHAE       | 12.1244846                | 11.46739397                 | 10.88608364                   | 10.30571672           | 0.698046749                             | 0.505712622                               | 0.566527565                                 | 0.688661095                         |
| 229  | KRT9        | 9.769693119               | 6.412043732                 | 4.677690145                   | 5.331487051           | 0.62936122                              | 1.551350676                               | 2.4860141                                   | 0.678786907                         |
| 615  | KRT10       | 6.28447362                | 3.9022887                   | 7.222503712                   | 4.848876929           | 0.267529289                             | 1.409127361                               | 0.959018752                                 | 3.256737791                         |
| 1114 | ANXA5       | 6.660351553               | 7.694869977                 | 9.264752276                   | 9.203962513           | 0.817143896                             | 1.079819899                               | 0.619439715                                 | 0.632799957                         |
| 1210 | KRT9        | 6.932834606               | 7.604572282                 | 9.891849667                   | 9.603744554           | 0.678002526                             | 1.162797704                               | 0.59541341                                  | 1.52168342                          |
| 1212 | ATP5B       | 5.422529051               | 8.001186845                 | 9.092746747                   | 10.36141833           | 1.528001054                             | 1.526797475                               | 1.075901853                                 | 1.56393354                          |
| 1222 | HSPA1A      | 6.715617641               | 8.39306792                  | 10.58480884                   | 10.70432313           | 0.267635702                             | 1.543058552                               | 0.805803143                                 | 1.277020958                         |
| 1313 | ACTB        | 8.162118672               | 10.80999626                 | 12.73376984                   | 12.31458636           | 1.149931672                             | 1.0791861                                 | 0.254589777                                 | 0.93583507                          |
| 1320 | ACTB        | 7.279755745               | 9.587546533                 | 11.59591                      | 10.8053617            | 0.347017072                             | 1.36936475                                | 0.165593028                                 | 1.762866333                         |
| 1342 | KRT7        | 5.705930221               | 9.578225045                 | 8.916786723                   | 9.729670405           | 1.289682416                             | 0.99320808                                | 0.466233841                                 | 0.842081344                         |
| 1501 | VIM         | 11.4424058                | 10.45489939                 | 8.253812733                   | 8.321507704           | 1.106627507                             | 0.8552516                                 | 0.700715951                                 | 2.257871705                         |
| 1607 | P4HB        | 12.24424743               | 13.25131091                 | 12.71717501                   | 11.48008914           | 1.312321375                             | 0.795526745                               | 0.773658097                                 | 0.121736151                         |
| 2003 | ANXA5       | 8.565998305               | 8.57625878                  | 11.0984855                    | 12.35726777           | 0.988057616                             | 2.144394632                               | 0.755589533                                 | 0.913681748                         |
| 2006 | THEMIS      | 1.851060318               | 5.106601048                 | 9.047669397                   | 7.277666666           | 3.256857459                             | 1.905927174                               | 1.104853392                                 | 1.699562419                         |
| 2007 | ACTB        | 6.532626593               | 6.778887666                 | 11.37296578                   | 11.4258968            | 1.387418601                             | 2.501598917                               | 0.901454134                                 | 0.412202907                         |
| 2111 | HSP90AB1    | 6.304058339               | 8.123903941                 | 10.63305859                   | 10.70076023           | 2.186708747                             | 0.743602007                               | 0.066134338                                 | 0.43505199                          |
| 2117 | ARHGODIA    | 11.03561344               | 8.418801737                 | 8.546820569                   | 9.510270297           | 0.689863694                             | 0.695276556                               | 2.323355621                                 | 1.016741766                         |
| 2120 | ACTB        | 5.610163533               | 6.516219273                 | 9.665187718                   | 8.822246387           | 0.980519735                             | 1.884848078                               | 0.365764963                                 | 0.13854893                          |
| 2302 | ANXA5       | 13.41036345               | 12.97408715                 | 11.00370659                   | 11.0368081            | 0.214680425                             | 0.641447169                               | 1.166291707                                 | 0.603709291                         |
| 2327 | TXNL1       | 9.161100441               | 8.031325571                 | 7.134664214                   | 7.485405554           | 0.288498105                             | 0.620522118                               | 1.183175023                                 | 0.314930189                         |
| 2509 | HSPD1       | 7.67424627                | 9.858847064                 | 10.8991931                    | 11.7213198            | 0.839063469                             | 1.46049328                                | 0.826355851                                 | 0.836483228                         |
| 2621 | VIM         | 12.09706197               | 9.40252999                  | 7.910754763                   | 7.807234956           | 0.851139088                             | 1.602076181                               | 1.805836394                                 | 0.434939248                         |
| 2623 | ATP5B       | 12.52055935               | 12.71165998                 | 13.91401126                   | 12.74774898           | 0.653023983                             | 0.585308188                               | 0.344516483                                 | 0.755567002                         |
| 2811 | HSP90AB1    | 8.244513826               | 6.841394461                 | 3.716791384                   | 3.608917453           | 1.059070478                             | 1.391152487                               | 1.175704513                                 | 1.645908756                         |
| 3009 | RAB18       | 8.444744317               | 9.263324951                 | 8.618864242                   | 7.417257533           | 0.409491584                             | 0.727552123                               | 0.376697161                                 | 0.572171573                         |
| 3020 | KRT9        | 5.234139311               | 7.025241901                 | 10.21450839                   | 10.23953677           | 3.11213062                              | 2.58706767                                | 0.907771908                                 | 0.741144897                         |
| 3220 | KRT10       | 6.731319176               | 8.984364622                 | 10.76290302                   | 10.41355731           | 0.654441993                             | 1.317574911                               | 0.525478319                                 | 0.674361006                         |
| 3221 | CLIC1       | 11.60509539               | 9.452271737                 | 10.08589437                   | 9.805047477           | 0.662937765                             | 0.816079755                               | 1.001781772                                 | 1.049928333                         |
| 3230 | ACTB        | 10.34509991               | 9.471759241                 | 11.88067819                   | 11.89427511           | 0.497340908                             | 1.423509673                               | 0.403010082                                 | 0.190337934                         |
| 3301 | ATP5B       | 7.551873756               | 9.765061109                 | 10.9089822                    | 10.77712987           | 1.167456956                             | 0.686873685                               | 0.779796284                                 | 0.886399707                         |
| 3314 | ATP5B       | 6.943126221               | 5.987765725                 | 8.490992995                   | 7.42796489            | 0.977185243                             | 0.723791686                               | 0.610478571                                 | 1.993557294                         |
| 3503 | ACTB        | 11.269091301              | 12.72620161                 | 12.16427416                   | 12.45044682           | 0.639940308                             | 0.318283604                               | 0.926214654                                 | 0.593651225                         |
| 3505 | ATP5B       | 10.31089276               | 9.196759243                 | 11.35409859                   | 10.41167854           | 0.283474855                             | 1.014872815                               | 0.502007049                                 | 1.066071519                         |
| 3602 | VIM         | 11.81106205               | 8.479059745                 | 7.287239905                   | 9.288019244           | 0.773036462                             | 0.981060517                               | 0.56561406                                  | 0.660462166                         |
| 3806 | HSPA5       | 7.880644648               | 8.114226216                 | 10.70272697                   | 9.79475924            | 1.963108597                             | 0.73691011                                | 0.730864235                                 | 1.362706893                         |
| 4005 | RBPA        | 8.444795588               | 11.86412834                 | 11.03158331                   | 11.73206422           | 0.546736554                             | 1.032843561                               | 2.23547514                                  | 0.821502249                         |
| 4006 | ACTG1       | 7.305868529               | 8.502768027                 | 11.2157152                    | 11.39464495           | 1.107663124                             | 0.835287208                               | 0.676917351                                 | 0.434945765                         |
| 4011 | RAB18       | 7.022352833               | 9.598298552                 | 9.63583781                    | 9.799328895           | 0.289571838                             | 0.527346304                               | 1.003011225                                 | 1.138005855                         |
| 4107 | HSPB1       | 10.85909759               | 9.826428809                 | 11.85168406                   | 11.53967955           | 1.050294329                             | 0.994445732                               | 0.469199111                                 | 0.576450156                         |
| 4207 | ATP5B       | 10.74758184               | 11.70292621                 | 11.78828936                   | 11.86947925           | 0.280993172                             | 0.33810114                                | 1.017294342                                 | 0.28251772                          |
| 4315 | PDIA6       | 7.32061478                | 8.417131369                 | 10.79171959                   | 11.61301807           | 1.462874897                             | 1.544338015                               | 1.334678784                                 | 0.511935875                         |
| 4419 | ALB         | 8.233056859               | 7.69504237                  | 10.45541231                   | 10.19765688           | 1.158252751                             | 1.122425567                               | 0.270300003                                 | 0.801248954                         |
| 4611 | HSPD1       | 7.37525475                | 9.265381323                 | 9.653972293                   | 10.71425747           | 0.367270151                             | 0.586979188                               | 0.950181906                                 | 0.533678435                         |
| 4621 | DES         | 11.9760606                | 6.714837672                 | 7.87900241                    | 8.514678041           | 0.824331498                             | 1.099020783                               | 1.589549643                                 | 1.064858881                         |
| 5009 | HSPA5       | 5.74070882                | 7.902160969                 | 11.01397678                   | 10.87260203           | 2.026378159                             | 2.245957595                               | 0.674667233                                 | 0.892694441                         |
| 5104 | ACTB        | 9.660372795               | 11.13266062                 | 13.49462679                   | 13.54290014           | 0.35408547                              | 1.175570783                               | 0.573502952                                 | 0.310259962                         |
| 5107 | PRDX4       | 8.032453224               | 7.827400823                 | 9.296505502                   | 9.745442578           | 0.785558236                             | 1.123862197                               | 0.473163467                                 | 0.139780011                         |
| 5217 | DDAH2       | 11.01753609               | 7.920203358                 | 8.56483195                    | 7.760243682           | 0.446778496                             | 1.148071743                               | 1.767096197                                 | 0.339138673                         |
| 5230 | ANXA2       | 6.40213434                | 9.212778434                 | 11.32290059                   | 11.92627534           | 1.363616013                             | 1.187099566                               | 0.461131545                                 | 0.080705222                         |
| 5304 | CAPZA1      | 10.88618347               | 9.592566746                 | 10.20716138                   | 10.48651485           | 0.411744276                             | 0.461175336                               | 0.664105219                                 | 0.923829796                         |
| 5322 | RPLPO       | 12.04747568               | 10.86761443                 | 9.500988321                   | 9.997651671           | 0.554547688                             | 0.677422033                               | 0.636561187                                 | 1.128830877                         |
| 5424 | KRT10       | 9.433656855               | 13.2153308                  | 12.88033418                   | 11.65882141           | 0.978162521                             | 0.384456424                               | 0.752806995                                 | 0.803840676                         |
| 5703 | HNRNPK      | 10.04949355               | 4.330024758                 | 8.103743384                   | 9.428027307           | 1.406542114                             | 2.520656206                               | 1.497123609                                 | 0.248701653                         |
| 5711 | PLCB4       | 6.492656697               | 7.982812049                 | 9.270616892                   | 9.805913016           | 0.849688699                             | 1.002503062                               | 1.635688063                                 | 1.110461038                         |
| 6113 | HSPB1       | 7.775841818               | 10.12438069                 | 11.16413436                   | 10.40097019           | 1.311353676                             | 0.446198205                               | 0.891901134                                 | 0.634304597                         |
| 6304 | ANXA4       | 12.60606169               | 10.65757825                 | 9.931631615                   | 9.627734099           | 0.34123027                              | 0.941861576                               | 1.167219292                                 | 0.892844818                         |
| 7123 | GRB2        | 9.051477505               | 7.989420197                 | 9.679025075                   | 8.742993249           | 0.21090828                              | 0.612105086                               | 0.328108316                                 | 0.338890542                         |
| 7451 | MPST        | 9.07058622                | 5.164444036                 | 5.81800863                    | 6.996736454           | 0.398583798                             | 1.359398627                               | 2.32931764                                  | 0.881041687                         |
| 7519 | PDIA3       | 5.972321986               | 7.876068972                 | 9.877160743                   | 9.615991248           | 0.835462821                             | 1.525812007                               | 1.071829759                                 | 1.155949218                         |
| 7537 | CRKL        | 8.363557499               | 4.383253299                 | 7.35109702                    | 6.527724448           | 0.26830816                              | 1.353383785                               | 1.397681199                                 | 1.243151109                         |
| 7815 | LMNA        | 7.002936524               | 6.385021252                 | 2.34721191                    | 4.161427706           | 2.074134023                             | 1.990774134                               | 1.06878881                                  | 1.470203776                         |
| 8101 | PARK7       | 12.09809183               | 9.202281661                 | 9.887018692                   | 9.659607191           | 0.448337206                             | 0.429607049                               | 1.24943817                                  | 1.627404188                         |
| 8308 | ANXA4       | 5.528110632               | 7.558309025                 | 9.332571101                   | 9.496158212           | 1.941900243                             | 1.126466428                               | 1.437368858                                 | 2.969607041                         |
| 8507 | GDI2        | 10.64028503               | 8.773605565                 | 10.02296634                   | 9.314665449           | 0.446822695                             | 0.723808327                               | 1.166229135                                 | 0.879235697                         |
| 8514 | SEPT2       | 10.83494874               | 6.403196642                 | 7.196757259                   | 5.51510625            | 0.485801531                             | 1.195793547                               | 0.183252686                                 | 0.710461959                         |
| 8609 | CCT2        | 11.02677387               | 7.629357742                 | 7.761979251                   | 7.650095199           | 0.885398734                             | 0.683553685                               | 0.923713399                                 | 1.30267949                          |
| 8620 | PDIA3       | 9.661991183               | 6.170676585                 | 9.368637878                   | 7.649228103           | 0.946379152                             | 1.836306665                               | 0.211435401                                 | 1.157001302                         |
| 9301 | AKR7A2      | 10.0794443                | 7.035073421                 | 7.992612189                   | 10.22717138           | 0.41859352                              | 1.911601517                               | 2.196019451                                 | 0.591620085                         |
